# Supplementary material
Source: publisher figshare collection journal article supplement (https://geolsoc.figshare.com/articles/dataset/_/3453656)
Supplement: Supplementary file 1 [file 1]

| Incremental Heating |         | 36Ar(a)  | 37Ar(ca) | 38Ar(cl) | 39Ar(k)  | 40Ar(r)  | Age ± 2σ (Ma)    | 40Ar(r) (%) |
|---------------------|---------|----------|----------|----------|----------|----------|------------------|-------------|
| 1B16045D            | 600 °C  | 0.000002 | 0.016603 | 0.000003 | 0.000587 | 0.000700 | 1.50 ± 10.77     | 54.25       |
| 1B16046D            | 700 °C  | 0.000057 | 0.057093 | 0.000000 | 0.002488 | 0.005440 | 2.75 ± 2.47      | 24.07       |
| 1B16047D            | 800 °C  | 0.000073 | 0.157971 | 0.000010 | 0.006941 | 0.013265 | 2.41 ± 1.08      | 37.83       |
| 1B16048D            | 870 °C  | 0.000056 | 0.212516 | 0.000000 | 0.010120 | 0.008587 | 1.07 ± 0.92      | 34.08       |
| 1B16049D            | 950 °C  | 0.000068 | 0.175987 | 0.000000 | 0.009112 | 0.009033 | 1.25 ± 0.85      | 30.82       |
| 1B16050D            | 1020 °C | 0.000197 | 0.141253 | 0.000000 | 0.007294 | 0.008220 | 1.42 ± 1.10      | 12.26       |
| 1B16051D            | 1080 °C | 0.000047 | 0.085307 | 0.000000 | 0.004315 | 0.019181 | 5.59 ± 1.68      | 57.96       |
| 1B16052D            | 1130 °C | 0.000058 | 0.075359 | 0.000000 | 0.003838 | 0.001753 | 0.58 ± 2.35      | 9.14        |
| 1B16053D            | 1180 °C | 0.000174 | 0.100253 | 0.000015 | 0.006471 | 0.005342 | 1.04 ± 1.12      | 9.34        |
| 1B16054D            | 1230 °C | 0.000142 | 0.150073 | 0.000006 | 0.011728 | 0.016355 | 1.76 ± 0.98      | 27.78       |
| 1B16055D            | 1280 °C | 0.000334 | 0.182901 | 0.000014 | 0.012571 | 0.013458 | 1.35 ± 0.97      | 11.88       |
| 1B16056D            | 1350 °C | 0.000362 | 0.249312 | 0.000024 | 0.013863 | 0.020364 | 1.85 ± 0.99      | 15.87       |
| 1B16057D            | 1420 °C | 0.001057 | 0.007758 | 0.000000 | 0.000021 | 0.009871 | 713.89 ± 1632.22 | 3.23        |
| 1B16058D            | 1500 °C | 0.000017 | 0.005959 | 0.000017 | 0.000021 | 0.006438 | 351.21 ± 539.44  | 55.79       |
| 1B16059D            | 1550 °C | 0.000192 | 0.003069 | 0.000000 | 0.000012 | 0.008989 | 747.66 ± 1189.67 | 18.62       |
| 1B16711D            | 600 °C  | 0.000122 | 0.056737 | 0.000032 | 0.002585 | 0.035168 | 17.06 ± 3.54     | 3171.74     |
| 1B16712D            | 700 °C  | 0.000091 | 0.208211 | 0.000015 | 0.008854 | 0.017919 | 2.55 ± 1.12      | 39.70       |
| 1B16713D            | 800 °C  | 0.000111 | 0.327326 | 0.000028 | 0.016434 | 0.015255 | 1.17 ± 0.63      | 31.49       |
| 1B16714D            | 870 °C  | 0.000084 | 0.301633 | 0.000000 | 0.015896 | 0.012961 | 1.03 ± 0.65      | 34.06       |
| 1B16715D            | 950 °C  | 0.000082 | 0.233009 | 0.000000 | 0.012546 | 0.012925 | 1.30 ± 0.86      | 34.52       |
| 1B16716D            | 1020 °C | 0.000291 | 0.128629 | 0.000001 | 0.007198 | 0.015733 | 2.75 ± 1.50      | 15.32       |
| 1B16717D            | 1080 °C | 0.000728 | 0.073437 | 0.000004 | 0.004205 | 0.007604 | 2.28 ± 3.37      | 3.38        |
| 1B16718D            | 1130 °C | 0.000373 | 0.077462 | 0.000002 | 0.004395 | 0.005643 | 1.62 ± 2.39      | 4.83        |
| 1B16719D            | 1180 °C | 0.000375 | 0.112198 | 0.000009 | 0.007436 | 0.008663 | 1.47 ± 1.56      | 7.18        |
| 1B16720D            | 1230 °C | 0.000422 | 0.154913 | 0.000013 | 0.012231 | 0.012468 | 1.28 ± 0.94      | 9.00        |
| 1B16721D            | 1280 °C | 0.000461 | 0.184166 | 0.000000 | 0.014190 | 0.014830 | 1.32 ± 0.89      | 9.73        |
| 1B16722D            | 1350 °C | 0.000293 | 0.120707 | 0.000005 | 0.007665 | 0.002550 | 0.42 ± 1.32      | 2.83        |
| 1B16723D            | 1450 °C | 0.000377 | 0.185878 | 0.000000 | 0.010117 | 0.002816 | 0.35 ± 1.44      | 2.44        |
| Σ                   |         | 0.006016 | 3.785721 | 0.000201 | 0.213134 | 0.290390 |                  |             |

**Information on Analysis**

Sample = PLG-D  
 Material = plg  
 Location = Furnace  
 Analyst = Eric Thern  
 Project = ANTILLES-NICE  
 Mass Discrimination Law = POW  
 Irradiation = 18t2h  
 J = 0.00069900 ± 0.00000203  
 GA1550 = 99.769 ± 0.110 Ma

| Results                 | 40(r)/39(k) ± 2σ            | Age ± 2σ (Ma)              | MSWD   |
|-------------------------|-----------------------------|----------------------------|--------|
| <b>Age Plateau</b>      | 1.0569 ± 0.1808<br>± 17.11% | 1.33 ± 0.23<br>± 17.11%    | 0.87   |
|                         |                             | Full External Error ± 0.23 | 2.07   |
|                         |                             | Analytical Error ± 0.23    | 1.0000 |
| <b>Total Fusion Age</b> | 1.3625 ± 0.2147<br>± 15.76% | 1.72 ± 0.27<br>± 15.76%    |        |
|                         |                             | Full External Error ± 0.27 |        |
|                         |                             | Analytical Error ± 0.27    |        |

| $^{39}\text{Ar}(k)$<br>(%) | K/Ca $\pm 2\sigma$  |
|----------------------------|---------------------|
| 0.28                       | 0.0152 $\pm$ 0.0044 |
| 1.17                       | 0.0187 $\pm$ 0.0026 |
| 3.26                       | 0.0189 $\pm$ 0.0020 |
| 4.75                       | 0.0205 $\pm$ 0.0021 |
| 4.28                       | 0.0223 $\pm$ 0.0024 |
| 3.42                       | 0.0222 $\pm$ 0.0024 |
| 2.02                       | 0.0217 $\pm$ 0.0027 |
| 1.80                       | 0.0219 $\pm$ 0.0026 |
| 3.04                       | 0.0278 $\pm$ 0.0033 |
| 5.50                       | 0.0336 $\pm$ 0.0035 |
| 5.90                       | 0.0296 $\pm$ 0.0032 |
| 6.50                       | 0.0239 $\pm$ 0.0024 |
| 0.01                       | 0.0012 $\pm$ 0.0015 |
| 0.01                       | 0.0015 $\pm$ 0.0016 |
| 0.01                       | 0.0017 $\pm$ 0.0036 |
| 1.21                       | 0.0196 $\pm$ 0.0043 |
| 4.15                       | 0.0183 $\pm$ 0.0023 |
| 7.71                       | 0.0216 $\pm$ 0.0026 |
| 7.46                       | 0.0227 $\pm$ 0.0028 |
| 5.89                       | 0.0232 $\pm$ 0.0028 |
| 3.38                       | 0.0241 $\pm$ 0.0035 |
| 1.97                       | 0.0246 $\pm$ 0.0041 |
| 2.06                       | 0.0244 $\pm$ 0.0042 |
| 3.49                       | 0.0285 $\pm$ 0.0038 |
| 5.74                       | 0.0340 $\pm$ 0.0049 |
| 6.66                       | 0.0331 $\pm$ 0.0051 |
| 3.60                       | 0.0273 $\pm$ 0.0037 |
| 4.75                       | 0.0234 $\pm$ 0.0031 |

| $^{39}\text{Ar}(k)$<br>(%,n) | K/Ca $\pm 2\sigma$  |
|------------------------------|---------------------|
| 92.60<br>24                  | 0.0178 $\pm$ 0.0042 |
| Statistical T Ratio          |                     |
| Error Magnification          |                     |
| 28                           | 0.0242 $\pm$ 0.0007 |

| Inverse Isochron |         | $39(k)/40(a+r) \pm 2\sigma$ | $36(a)/40(a+r) \pm 2\sigma$ | r.i.   |
|------------------|---------|-----------------------------|-----------------------------|--------|
| 1B16045D         | 600 °C  | 0.454773 ± 0.831245         | 0.001533 ± 0.011815         | 0.2368 |
| 1B16046D         | 700 °C  | 0.110068 ± 0.012859         | 0.002543 ± 0.000681         | 0.4021 |
| 1B16047D         | 800 °C  | 0.197997 ± 0.014259         | 0.002082 ± 0.000537         | 0.2634 |
| 1B16048D         | 870 °C  | 0.401801 ± 0.038559         | 0.002207 ± 0.000959         | 0.2104 |
| 1B16049D         | 950 °C  | 0.310945 ± 0.025827         | 0.002317 ± 0.000671         | 0.2785 |
| 1B16050D         | 1020 °C | 0.108821 ± 0.004521         | 0.002939 ± 0.000312         | 0.2851 |
| 1B16051D         | 1080 °C | 0.130395 ± 0.009722         | 0.001408 ± 0.000542         | 0.1763 |
| 1B16052D         | 1130 °C | 0.200142 ± 0.024784         | 0.003043 ± 0.001241         | 0.3010 |
| 1B16053D         | 1180 °C | 0.113161 ± 0.005179         | 0.003037 ± 0.000333         | 0.3438 |
| 1B16054D         | 1230 °C | 0.199263 ± 0.013580         | 0.002419 ± 0.000494         | 0.3214 |
| 1B16055D         | 1280 °C | 0.110995 ± 0.004036         | 0.002951 ± 0.000282         | 0.3484 |
| 1B16056D         | 1350 °C | 0.108017 ± 0.003770         | 0.002818 ± 0.000278         | 0.2739 |
| 1B16057D         | 1420 °C | 0.000069 ± 0.000075         | 0.003458 ± 0.000164         | 0.0033 |
| 1B16058D         | 1500 °C | 0.001812 ± 0.001704         | 0.001481 ± 0.002500         | 0.0733 |
| 1B16059D         | 1550 °C | 0.000253 ± 0.000414         | 0.003973 ± 0.000680         | 0.0236 |
| 1B16711D         | 600 °C  | 2.327413 ± 7.082127         | 0.109417 ± 0.333512         | 0.9983 |
| 1B16712D         | 700 °C  | 0.196161 ± 0.015095         | 0.002020 ± 0.000548         | 0.2753 |
| 1B16713D         | 800 °C  | 0.339368 ± 0.024004         | 0.002294 ± 0.000547         | 0.2907 |
| 1B16714D         | 870 °C  | 0.417798 ± 0.037250         | 0.002208 ± 0.000687         | 0.2835 |
| 1B16715D         | 950 °C  | 0.335154 ± 0.030497         | 0.002193 ± 0.000730         | 0.2684 |
| 1B16716D         | 1020 °C | 0.070104 ± 0.002502         | 0.002836 ± 0.000274         | 0.3156 |
| 1B16717D         | 1080 °C | 0.018681 ± 0.000397         | 0.003236 ± 0.000167         | 0.2076 |
| 1B16718D         | 1130 °C | 0.037586 ± 0.001252         | 0.003188 ± 0.000237         | 0.3370 |
| 1B16719D         | 1180 °C | 0.061631 ± 0.001816         | 0.003109 ± 0.000253         | 0.3330 |
| 1B16720D         | 1230 °C | 0.088283 ± 0.002400         | 0.003048 ± 0.000218         | 0.3075 |
| 1B16721D         | 1280 °C | 0.093149 ± 0.002269         | 0.003023 ± 0.000219         | 0.2863 |
| 1B16722D         | 1350 °C | 0.085010 ± 0.003317         | 0.003255 ± 0.000298         | 0.3961 |
| 1B16723D         | 1450 °C | 0.087631 ± 0.002712         | 0.003268 ± 0.000335         | 0.2739 |

| Results          | $40(a)/36(a) \pm 2\sigma$                                           | $40(r)/39(k) \pm 2\sigma$  | Age ± 2σ (Ma)                                          | MSWD                                 |
|------------------|---------------------------------------------------------------------|----------------------------|--------------------------------------------------------|--------------------------------------|
| Inverse Isochron | 298.7981 ± 4.1477<br>± 1.39%                                        | 1.0626 ± 0.1054<br>± 9.92% | 1.34 ± 0.13<br>± 9.94%                                 | 0.99                                 |
|                  |                                                                     |                            | Full External Error ± 0.13<br>Analytical Error ± 0.13  |                                      |
| Statistics       | Statistical F ratio<br>Error Magnification<br>Number of Data Points | 1.54<br>1.0000<br>24       | Convergence<br>Number of Iterations<br>Calculated Line | 0.0019915632<br>4<br>Weighted York-2 |

| Relative Abundances |         | 36Ar      | %1σ     | 37Ar      | %1σ    | 38Ar      | %1σ    | 39Ar      | %1σ    | 40Ar      | %1σ     | Age ± 2σ (Ma)    | 40Ar(r) (%) | 39Ar(k) (%) | K/Ca ± 2σ       |
|---------------------|---------|-----------|---------|-----------|--------|-----------|--------|-----------|--------|-----------|---------|------------------|-------------|-------------|-----------------|
| 1B16045D            | 600 °C  | 0.0000027 | 272.515 | 0.0166030 | 14.218 | 0.0000103 | 85.627 | 0.0005988 | 3.376  | 0.0012896 | 91.353  | 1.50 ± 10.77     | 54.25       | 0.28        | 0.0152 ± 0.0044 |
| 1B16046D            | 700 °C  | 0.0000736 | 9.380   | 0.0570929 | 6.688  | 0.0000406 | 21.172 | 0.0025294 | 1.597  | 0.0226029 | 5.607   | 2.75 ± 2.47      | 24.07       | 1.17        | 0.0187 ± 0.0026 |
| 1B16047D            | 800 °C  | 0.0001175 | 7.434   | 0.1579706 | 5.311  | 0.0001131 | 12.145 | 0.0070563 | 0.817  | 0.0350608 | 3.497   | 2.41 ± 1.08      | 37.83       | 3.26        | 0.0189 ± 0.0020 |
| 1B16048D            | 870 °C  | 0.0001155 | 9.867   | 0.2125164 | 4.978  | 0.0001376 | 9.109  | 0.0102753 | 1.010  | 0.0251938 | 4.682   | 1.07 ± 0.92      | 34.08       | 4.75        | 0.0205 ± 0.0021 |
| 1B16049D            | 950 °C  | 0.0001175 | 7.685   | 0.1759868 | 5.407  | 0.0001235 | 9.493  | 0.0092403 | 0.671  | 0.0293098 | 4.092   | 1.25 ± 0.85      | 30.82       | 4.28        | 0.0223 ± 0.0024 |
| 1B16050D            | 1020 °C | 0.0002368 | 4.064   | 0.1412532 | 5.342  | 0.0001186 | 8.128  | 0.0073974 | 1.052  | 0.0670351 | 1.774   | 1.42 ± 1.10      | 12.26       | 3.42        | 0.0222 ± 0.0024 |
| 1B16051D            | 1080 °C | 0.0000706 | 12.302  | 0.0853072 | 6.159  | 0.0000524 | 19.360 | 0.0043770 | 1.083  | 0.0330925 | 3.557   | 5.59 ± 1.68      | 57.96       | 2.02        | 0.0217 ± 0.0027 |
| 1B16052D            | 1130 °C | 0.0000796 | 14.151  | 0.0753589 | 5.948  | 0.0000579 | 12.957 | 0.0038933 | 0.557  | 0.0191806 | 6.162   | 0.58 ± 2.35      | 9.14        | 1.80        | 0.0219 ± 0.0026 |
| 1B16053D            | 1180 °C | 0.0002019 | 4.288   | 0.1002534 | 5.899  | 0.0001305 | 7.615  | 0.0065437 | 0.937  | 0.0571846 | 2.078   | 1.04 ± 1.12      | 9.34        | 3.04        | 0.0278 ± 0.0033 |
| 1B16054D            | 1230 °C | 0.0001847 | 7.333   | 0.1500727 | 5.235  | 0.0001814 | 7.592  | 0.0118378 | 0.641  | 0.0588661 | 3.343   | 1.76 ± 0.98      | 27.78       | 5.50        | 0.0336 ± 0.0035 |
| 1B16055D            | 1280 °C | 0.0003859 | 3.784   | 0.1829010 | 5.421  | 0.0002370 | 5.274  | 0.0127048 | 0.507  | 0.1132680 | 1.740   | 1.35 ± 0.97      | 11.88       | 5.90        | 0.0296 ± 0.0032 |
| 1B16056D            | 1350 °C | 0.0004320 | 3.830   | 0.2493124 | 5.049  | 0.0002692 | 4.513  | 0.0140452 | 0.805  | 0.1283522 | 1.535   | 1.85 ± 0.99      | 15.87       | 6.50        | 0.0239 ± 0.0024 |
| 1B16057D            | 1420 °C | 0.0010589 | 2.282   | 0.0077576 | 37.063 | 0.0001912 | 6.201  | 0.0000268 | 41.818 | 0.3056253 | 0.647   | 713.89 ± 1632.22 | 3.23        | 0.01        | 0.0012 ± 0.0015 |
| 1B16058D            | 1500 °C | 0.0000188 | 75.180  | 0.0059590 | 28.168 | 0.0000210 | 43.685 | 0.0000253 | 35.888 | 0.0115403 | 17.050  | 351.21 ± 539.44  | 55.79       | 0.01        | 0.0015 ± 0.0016 |
| 1B16059D            | 1550 °C | 0.0001909 | 7.557   | 0.0030692 | 65.981 | 0.0000532 | 19.054 | 0.0000145 | 68.240 | 0.0482653 | 4.067   | 747.66 ± 1189.67 | 18.62       | 0.01        | 0.0017 ± 0.0036 |
| 1B16711D            | 600 °C  | 0.0001055 | 10.127  | 0.0567373 | 11.058 | 0.0000430 | 14.916 | 0.0026261 | 0.835  | 0.0011088 | 152.383 | 17.06 ± 3.54     | 3171.74     | 1.21        | 0.0196 ± 0.0043 |
| 1B16712D            | 700 °C  | 0.0001499 | 7.518   | 0.2082110 | 6.272  | 0.0001471 | 4.820  | 0.0090056 | 0.618  | 0.0451405 | 3.789   | 2.55 ± 1.12      | 39.70       | 4.15        | 0.0183 ± 0.0023 |
| 1B16713D            | 800 °C  | 0.0002034 | 5.573   | 0.3273264 | 5.995  | 0.0002603 | 5.649  | 0.0166733 | 0.474  | 0.0484374 | 3.498   | 1.17 ± 0.63      | 31.49       | 7.71        | 0.0216 ± 0.0026 |
| 1B16714D            | 870 °C  | 0.0001691 | 6.723   | 0.3016335 | 6.107  | 0.0002049 | 6.036  | 0.0161165 | 0.421  | 0.0380585 | 4.433   | 1.03 ± 0.65      | 34.06       | 7.46        | 0.0227 ± 0.0028 |
| 1B16715D            | 950 °C  | 0.0001478 | 8.469   | 0.2330095 | 6.080  | 0.0001664 | 6.101  | 0.0127158 | 0.575  | 0.0374412 | 4.508   | 1.30 ± 0.86      | 34.52       | 5.89        | 0.0232 ± 0.0028 |
| 1B16716D            | 1020 °C | 0.0003275 | 3.950   | 0.1286294 | 7.252  | 0.0001478 | 7.398  | 0.0072917 | 0.654  | 0.1026787 | 1.648   | 2.75 ± 1.50      | 15.32       | 3.38        | 0.0241 ± 0.0035 |
| 1B16717D            | 1080 °C | 0.0007492 | 2.389   | 0.0734366 | 8.364  | 0.0001944 | 4.187  | 0.0042584 | 0.719  | 0.2250922 | 0.755   | 2.28 ± 3.37      | 3.38        | 1.97        | 0.0246 ± 0.0041 |
| 1B16718D            | 1130 °C | 0.0003946 | 3.202   | 0.0774625 | 8.664  | 0.0001276 | 6.916  | 0.0044520 | 0.797  | 0.1169466 | 1.445   | 1.62 ± 2.39      | 4.83        | 2.06        | 0.0244 ± 0.0042 |
| 1B16719D            | 1180 °C | 0.0004067 | 3.486   | 0.1121977 | 6.735  | 0.0001739 | 6.232  | 0.0075177 | 0.384  | 0.1206564 | 1.414   | 1.47 ± 1.56      | 7.18        | 3.49        | 0.0285 ± 0.0038 |
| 1B16720D            | 1230 °C | 0.0004660 | 2.963   | 0.1549128 | 7.152  | 0.0002476 | 3.308  | 0.0123444 | 0.579  | 0.1385552 | 1.221   | 1.28 ± 0.94      | 9.00        | 5.74        | 0.0340 ± 0.0049 |
| 1B16721D            | 1280 °C | 0.0005125 | 2.993   | 0.1841660 | 7.643  | 0.0002555 | 5.118  | 0.0143247 | 0.448  | 0.1523491 | 1.124   | 1.32 ± 0.89      | 9.73        | 6.66        | 0.0331 ± 0.0051 |
| 1B16722D            | 1350 °C | 0.0003275 | 3.669   | 0.1207067 | 6.674  | 0.0001577 | 6.218  | 0.0077531 | 0.495  | 0.0901700 | 1.880   | 0.42 ± 1.32      | 2.83        | 3.60        | 0.0273 ± 0.0037 |
| 1B16723D            | 1450 °C | 0.0004297 | 4.226   | 0.1858776 | 6.702  | 0.0001996 | 5.285  | 0.0102528 | 0.434  | 0.1154585 | 1.473   | 0.35 ± 1.44      | 2.44        | 4.75        | 0.0234 ± 0.0031 |
| Σ                   |         | 0.0070835 | 0.981   | 3.7857214 | 1.365  | 0.0039567 | 1.429  | 0.2158980 | 0.141  | 2.0866326 | 0.411   |                  |             |             |                 |

| Information on Analysis and Constants Used in Calculations |                                                                 |
|------------------------------------------------------------|-----------------------------------------------------------------|
| Sample = PLG-D                                             | Age Equations = Min et al. (2000)                               |
| Material = plg                                             | Negative Intensities = Allowed                                  |
| Location = Furnace                                         | Decay Constant 40K = 5.549 ± 0.009 E-10 1/a                     |
| Analyst = Eric Thern                                       | Decay Constant 39Ar = 2.940 ± 0.029 E-07 1/h                    |
| Project = ANTILLES-NICE                                    | Decay Constant 37Ar = 8.230 ± 0.082 E-04 1/h                    |
| Mass Discrimination Law = POW                              | Decay Constant 36Cl = 2.303 ± 0.046 E-06 1/a                    |
| Irradiation = I812h                                        | Production Ratio 36/38 in Cl = 263.0 ± 13.2                     |
| J = 0.00069900 ± 0.00000203                                | Decay Constant 40K(EC,β <sup>+</sup> ) = 0.576 ± 0.002 E-10 1/a |
| GA1550 = 99.769 ± 0.110 Ma                                 | Decay Constant 40K(β <sup>-</sup> ) = 4.974 ± 0.009 E-10 1/a    |
| IGSN = Undefined                                           | Abundance Ratio 40K/K = 1.1700 ± 0.0100 E-04                    |
| Preferred Age = Undefined                                  | Atomic Weight K = 39.0983 ± 0.0001 g                            |
| Classification = Undefined                                 |                                                                 |
| Experiment Type = Undefined                                |                                                                 |
| Extraction Method = Undefined                              |                                                                 |
| Heating = 60 sec                                           |                                                                 |
| Isolation = 5.00 min                                       |                                                                 |
| Instrument = MAP215-50                                     |                                                                 |
| Lithology = Undefined                                      |                                                                 |
| Lat-Lon = Undefined - Undefined                            |                                                                 |

| Results          | 40(r)/39(k) ± 2σ         | Age ± 2σ (Ma)                                         | MSWD | 39Ar(k) (%n)        | K/Ca ± 2σ           |
|------------------|--------------------------|-------------------------------------------------------|------|---------------------|---------------------|
| Age Plateau      | 1.0569 ± 0.1808 ± 17.11% | 1.33 ± 0.23 ± 17.11%                                  | 0.87 | 92.60<br>24         | 0.0178 ± 0.0042     |
|                  |                          | Full External Error ± 0.23<br>Analytical Error ± 0.23 | 2.07 | Statistical T Ratio | Error Magnification |
| Total Fusion Age | 1.3625 ± 0.2147 ± 15.76% | 1.72 ± 0.27 ± 15.76%                                  |      | 28                  | 0.0242 ± 0.0007     |
|                  |                          | Full External Error ± 0.27<br>Analytical Error ± 0.27 |      |                     |                     |
| Normal Isochron  | 1.0021 ± 0.2353 ± 23.48% | 1.26 ± 0.30 ± 23.48%                                  | 0.81 | 92.60<br>24         |                     |
|                  |                          | Full External Error ± 0.30<br>Analytical Error ± 0.30 | 1.54 | Statistical F ratio | Error Magnification |
| Inverse Isochron | 1.0626 ± 0.1054 ± 9.92%  | 1.34 ± 0.13 ± 9.94%                                   | 0.99 | 92.60<br>24         |                     |
|                  |                          | Full External Error ± 0.13<br>Analytical Error ± 0.13 | 1.54 | Statistical F ratio | Error Magnification |

Institute of Geophysics and Planetary Physics  
 Scripps Institution of Oceanography, La Jolla, USA

| Procedure<br>Blanks |         | 36Ar     | 1σ       | 37Ar     | 1σ       | 38Ar     | 1σ       | 39Ar     | 1σ       | 40Ar     |
|---------------------|---------|----------|----------|----------|----------|----------|----------|----------|----------|----------|
| 1B16045D            | 600 °C  | 0.000053 | 0.000006 | 0.000418 | 0.000013 | 0.000017 | 0.000007 | 0.000016 | 0.000008 | 0.010206 |
| 1B16046D            | 700 °C  | 0.000060 | 0.000006 | 0.000404 | 0.000013 | 0.000019 | 0.000007 | 0.000016 | 0.000008 | 0.010511 |
| 1B16047D            | 800 °C  | 0.000069 | 0.000006 | 0.000389 | 0.000013 | 0.000021 | 0.000007 | 0.000016 | 0.000008 | 0.013075 |
| 1B16048D            | 870 °C  | 0.000065 | 0.000006 | 0.000382 | 0.000013 | 0.000021 | 0.000007 | 0.000016 | 0.000008 | 0.012777 |
| 1B16049D            | 950 °C  | 0.000054 | 0.000006 | 0.000381 | 0.000013 | 0.000020 | 0.000007 | 0.000016 | 0.000008 | 0.010496 |
| 1B16050D            | 1020 °C | 0.000048 | 0.000006 | 0.000386 | 0.000013 | 0.000019 | 0.000007 | 0.000016 | 0.000008 | 0.009313 |
| 1B16051D            | 1080 °C | 0.000048 | 0.000006 | 0.000386 | 0.000013 | 0.000019 | 0.000007 | 0.000016 | 0.000008 | 0.009313 |
| 1B16052D            | 1130 °C | 0.000089 | 0.000006 | 0.000398 | 0.000013 | 0.000024 | 0.000007 | 0.000016 | 0.000008 | 0.020050 |
| 1B16053D            | 1180 °C | 0.000150 | 0.000006 | 0.000401 | 0.000013 | 0.000030 | 0.000007 | 0.000016 | 0.000008 | 0.035810 |
| 1B16054D            | 1230 °C | 0.000086 | 0.000011 | 0.000378 | 0.000012 | 0.000030 | 0.000006 | 0.000015 | 0.000007 | 0.016252 |
| 1B16055D            | 1280 °C | 0.000086 | 0.000011 | 0.000378 | 0.000012 | 0.000028 | 0.000006 | 0.000015 | 0.000007 | 0.016968 |
| 1B16056D            | 1350 °C | 0.000104 | 0.000011 | 0.000384 | 0.000012 | 0.000028 | 0.000006 | 0.000015 | 0.000007 | 0.024405 |
| 1B16057D            | 1420 °C | 0.000181 | 0.000011 | 0.000394 | 0.000012 | 0.000038 | 0.000006 | 0.000015 | 0.000007 | 0.048557 |
| 1B16058D            | 1500 °C | 0.000416 | 0.000011 | 0.000405 | 0.000012 | 0.000085 | 0.000006 | 0.000015 | 0.000007 | 0.114118 |
| 1B16059D            | 1550 °C | 0.000690 | 0.000011 | 0.000407 | 0.000012 | 0.000146 | 0.000006 | 0.000015 | 0.000007 | 0.186448 |
| 1B16711D            | 600 °C  | 0.000267 | 0.000010 | 0.000374 | 0.000012 | 0.000028 | 0.000005 | 0.000137 | 0.000007 | 0.039679 |
| 1B16712D            | 700 °C  | 0.000112 | 0.000010 | 0.000351 | 0.000012 | 0.000013 | 0.000005 | 0.000045 | 0.000007 | 0.018356 |
| 1B16713D            | 800 °C  | 0.000062 | 0.000010 | 0.000342 | 0.000012 | 0.000012 | 0.000005 | 0.000014 | 0.000007 | 0.012828 |
| 1B16714D            | 870 °C  | 0.000060 | 0.000010 | 0.000340 | 0.000012 | 0.000015 | 0.000005 | 0.000012 | 0.000007 | 0.013355 |
| 1B16715D            | 950 °C  | 0.000071 | 0.000010 | 0.000338 | 0.000012 | 0.000018 | 0.000005 | 0.000015 | 0.000007 | 0.015321 |
| 1B16716D            | 1020 °C | 0.000080 | 0.000010 | 0.000336 | 0.000012 | 0.000020 | 0.000005 | 0.000019 | 0.000007 | 0.016991 |
| 1B16717D            | 1080 °C | 0.000086 | 0.000010 | 0.000334 | 0.000012 | 0.000021 | 0.000005 | 0.000020 | 0.000007 | 0.018200 |
| 1B16718D            | 1130 °C | 0.000089 | 0.000010 | 0.000332 | 0.000012 | 0.000021 | 0.000005 | 0.000019 | 0.000007 | 0.019332 |
| 1B16719D            | 1180 °C | 0.000091 | 0.000010 | 0.000331 | 0.000012 | 0.000021 | 0.000005 | 0.000019 | 0.000007 | 0.021082 |
| 1B16720D            | 1230 °C | 0.000096 | 0.000010 | 0.000329 | 0.000012 | 0.000022 | 0.000005 | 0.000020 | 0.000007 | 0.024164 |
| 1B16721D            | 1280 °C | 0.000107 | 0.000010 | 0.000328 | 0.000012 | 0.000026 | 0.000005 | 0.000025 | 0.000007 | 0.029519 |
| 1B16722D            | 1350 °C | 0.000143 | 0.000010 | 0.000331 | 0.000012 | 0.000036 | 0.000005 | 0.000045 | 0.000007 | 0.043105 |
| 1B16723D            | 1450 °C | 0.000267 | 0.000010 | 0.000345 | 0.000012 | 0.000070 | 0.000005 | 0.000120 | 0.000007 | 0.082316 |

---

$1\sigma$

---

0.001176  
0.001176  
0.001176  
0.001176  
0.001176  
0.001176  
0.001176  
0.001176  
0.001958  
0.001958  
0.001958  
0.001958  
0.001958  
0.001958  
0.001686  
0.001686  
0.001686  
0.001686  
0.001686  
0.001686  
0.001686  
0.001686  
0.001686  
0.001686  
0.001686  
0.001686  
0.001686  
0.001686  
0.001686

---

| Sample Parameters |         | Sample | Material | Location |
|-------------------|---------|--------|----------|----------|
| 1B16045D          | 600 °C  | PIg-D  | plg      | Furnace  |
| 1B16046D          | 700 °C  | PIg-D  | plg      | Furnace  |
| 1B16047D          | 800 °C  | PIg-D  | plg      | Furnace  |
| 1B16048D          | 870 °C  | PIg-D  | plg      | Furnace  |
| 1B16049D          | 950 °C  | PIg-D  | plg      | Furnace  |
| 1B16050D          | 1020 °C | PIg-D  | plg      | Furnace  |
| 1B16051D          | 1080 °C | PIg-D  | plg      | Furnace  |
| 1B16052D          | 1130 °C | PIg-D  | plg      | Furnace  |
| 1B16053D          | 1180 °C | PIg-D  | plg      | Furnace  |
| 1B16054D          | 1230 °C | PIg-D  | plg      | Furnace  |
| 1B16055D          | 1280 °C | PIg-D  | plg      | Furnace  |
| 1B16056D          | 1350 °C | PIg-D  | plg      | Furnace  |
| 1B16057D          | 1420 °C | PIg-D  | plg      | Furnace  |
| 1B16058D          | 1500 °C | PIg-D  | plg      | Furnace  |
| 1B16059D          | 1550 °C | PIg-D  | plg      | Furnace  |
| 1B16711D          | 600 °C  | PIg-E  | plg      | Furnace  |
| 1B16712D          | 700 °C  | PIg-E  | plg      | Furnace  |
| 1B16713D          | 800 °C  | PIg-E  | plg      | Furnace  |
| 1B16714D          | 870 °C  | PIg-E  | plg      | Furnace  |
| 1B16715D          | 950 °C  | PIg-E  | plg      | Furnace  |
| 1B16716D          | 1020 °C | PIg-E  | plg      | Furnace  |
| 1B16717D          | 1080 °C | PIg-E  | plg      | Furnace  |
| 1B16718D          | 1130 °C | PIg-E  | plg      | Furnace  |
| 1B16719D          | 1180 °C | PIg-E  | plg      | Furnace  |
| 1B16720D          | 1230 °C | PIg-E  | plg      | Furnace  |
| 1B16721D          | 1280 °C | PIg-E  | plg      | Furnace  |
| 1B16722D          | 1350 °C | PIg-E  | plg      | Furnace  |
| 1B16723D          | 1450 °C | PIg-E  | plg      | Furnace  |

| Analyst      | Temp |
|--------------|------|
| Eric Thern   | 600  |
| Eric Thern   | 700  |
| Eric Thern   | 800  |
| Eric Thern   | 870  |
| Eric Thern   | 950  |
| Eric Thern   | 1020 |
| Eric Thern   | 1080 |
| Eric Thern   | 1130 |
| Eric Thern   | 1180 |
| Eric Thern   | 1230 |
| Eric Thern   | 1280 |
| Eric Thern   | 1350 |
| Eric Thern   | 1420 |
| Eric Thern   | 1500 |
| Eric Thern   | 1550 |
| Fred Jourdan | 600  |
| Fred Jourdan | 700  |
| Fred Jourdan | 800  |
| Fred Jourdan | 870  |
| Fred Jourdan | 950  |
| Fred Jourdan | 1020 |
| Fred Jourdan | 1080 |
| Fred Jourdan | 1130 |
| Fred Jourdan | 1180 |
| Fred Jourdan | 1230 |
| Fred Jourdan | 1280 |
| Fred Jourdan | 1350 |
| Fred Jourdan | 1450 |







| Irradiation<br>Constants | 40/36(a)  |             | 40/36(c)  |             | 38/36(a)  |             | 38/36(c)  |             |   |
|--------------------------|-----------|-------------|-----------|-------------|-----------|-------------|-----------|-------------|---|
|                          | Temp (°C) | %1 $\sigma$ |   |
| 1B16045D                 | 600 °C    | 298.56      | 0.1       | 0.018       | 35        | 0.1869      | 0.1       | 1.493       | 3 |
| 1B16046D                 | 700 °C    | 298.56      | 0.1       | 0.018       | 35        | 0.1869      | 0.1       | 1.493       | 3 |
| 1B16047D                 | 800 °C    | 298.56      | 0.1       | 0.018       | 35        | 0.1869      | 0.1       | 1.493       | 3 |
| 1B16048D                 | 870 °C    | 298.56      | 0.1       | 0.018       | 35        | 0.1869      | 0.1       | 1.493       | 3 |
| 1B16049D                 | 950 °C    | 298.56      | 0.1       | 0.018       | 35        | 0.1869      | 0.1       | 1.493       | 3 |
| 1B16050D                 | 1020 °C   | 298.56      | 0.1       | 0.018       | 35        | 0.1869      | 0.1       | 1.493       | 3 |
| 1B16051D                 | 1080 °C   | 298.56      | 0.1       | 0.018       | 35        | 0.1869      | 0.1       | 1.493       | 3 |
| 1B16052D                 | 1130 °C   | 298.56      | 0.1       | 0.018       | 35        | 0.1869      | 0.1       | 1.493       | 3 |
| 1B16053D                 | 1180 °C   | 298.56      | 0.1       | 0.018       | 35        | 0.1869      | 0.1       | 1.493       | 3 |
| 1B16054D                 | 1230 °C   | 298.56      | 0.1       | 0.018       | 35        | 0.1869      | 0.1       | 1.493       | 3 |
| 1B16055D                 | 1280 °C   | 298.56      | 0.1       | 0.018       | 35        | 0.1869      | 0.1       | 1.493       | 3 |
| 1B16056D                 | 1350 °C   | 298.56      | 0.1       | 0.018       | 35        | 0.1869      | 0.1       | 1.493       | 3 |
| 1B16057D                 | 1420 °C   | 298.56      | 0.1       | 0.018       | 35        | 0.1869      | 0.1       | 1.493       | 3 |
| 1B16058D                 | 1500 °C   | 298.56      | 0.1       | 0.018       | 35        | 0.1869      | 0.1       | 1.493       | 3 |
| 1B16059D                 | 1550 °C   | 298.56      | 0.1       | 0.018       | 35        | 0.1869      | 0.1       | 1.493       | 3 |
| 1B16711D                 | 600 °C    | 298.56      | 0.1       | 0.018       | 35        | 0.1869      | 0.1       | 1.493       | 3 |
| 1B16712D                 | 700 °C    | 298.56      | 0.1       | 0.018       | 35        | 0.1869      | 0.1       | 1.493       | 3 |
| 1B16713D                 | 800 °C    | 298.56      | 0.1       | 0.018       | 35        | 0.1869      | 0.1       | 1.493       | 3 |
| 1B16714D                 | 870 °C    | 298.56      | 0.1       | 0.018       | 35        | 0.1869      | 0.1       | 1.493       | 3 |
| 1B16715D                 | 950 °C    | 298.56      | 0.1       | 0.018       | 35        | 0.1869      | 0.1       | 1.493       | 3 |
| 1B16716D                 | 1020 °C   | 298.56      | 0.1       | 0.018       | 35        | 0.1869      | 0.1       | 1.493       | 3 |
| 1B16717D                 | 1080 °C   | 298.56      | 0.1       | 0.018       | 35        | 0.1869      | 0.1       | 1.493       | 3 |
| 1B16718D                 | 1130 °C   | 298.56      | 0.1       | 0.018       | 35        | 0.1869      | 0.1       | 1.493       | 3 |
| 1B16719D                 | 1180 °C   | 298.56      | 0.1       | 0.018       | 35        | 0.1869      | 0.1       | 1.493       | 3 |
| 1B16720D                 | 1230 °C   | 298.56      | 0.1       | 0.018       | 35        | 0.1869      | 0.1       | 1.493       | 3 |
| 1B16721D                 | 1280 °C   | 298.56      | 0.1       | 0.018       | 35        | 0.1869      | 0.1       | 1.493       | 3 |
| 1B16722D                 | 1350 °C   | 298.56      | 0.1       | 0.018       | 35        | 0.1869      | 0.1       | 1.493       | 3 |
| 1B16723D                 | 1450 °C   | 298.56      | 0.1       | 0.018       | 35        | 0.1869      | 0.1       | 1.493       | 3 |





VERATI-COMBOPLGD+E.AGE >>> PLG-D >>> ANTILLES-NICE PROJECT

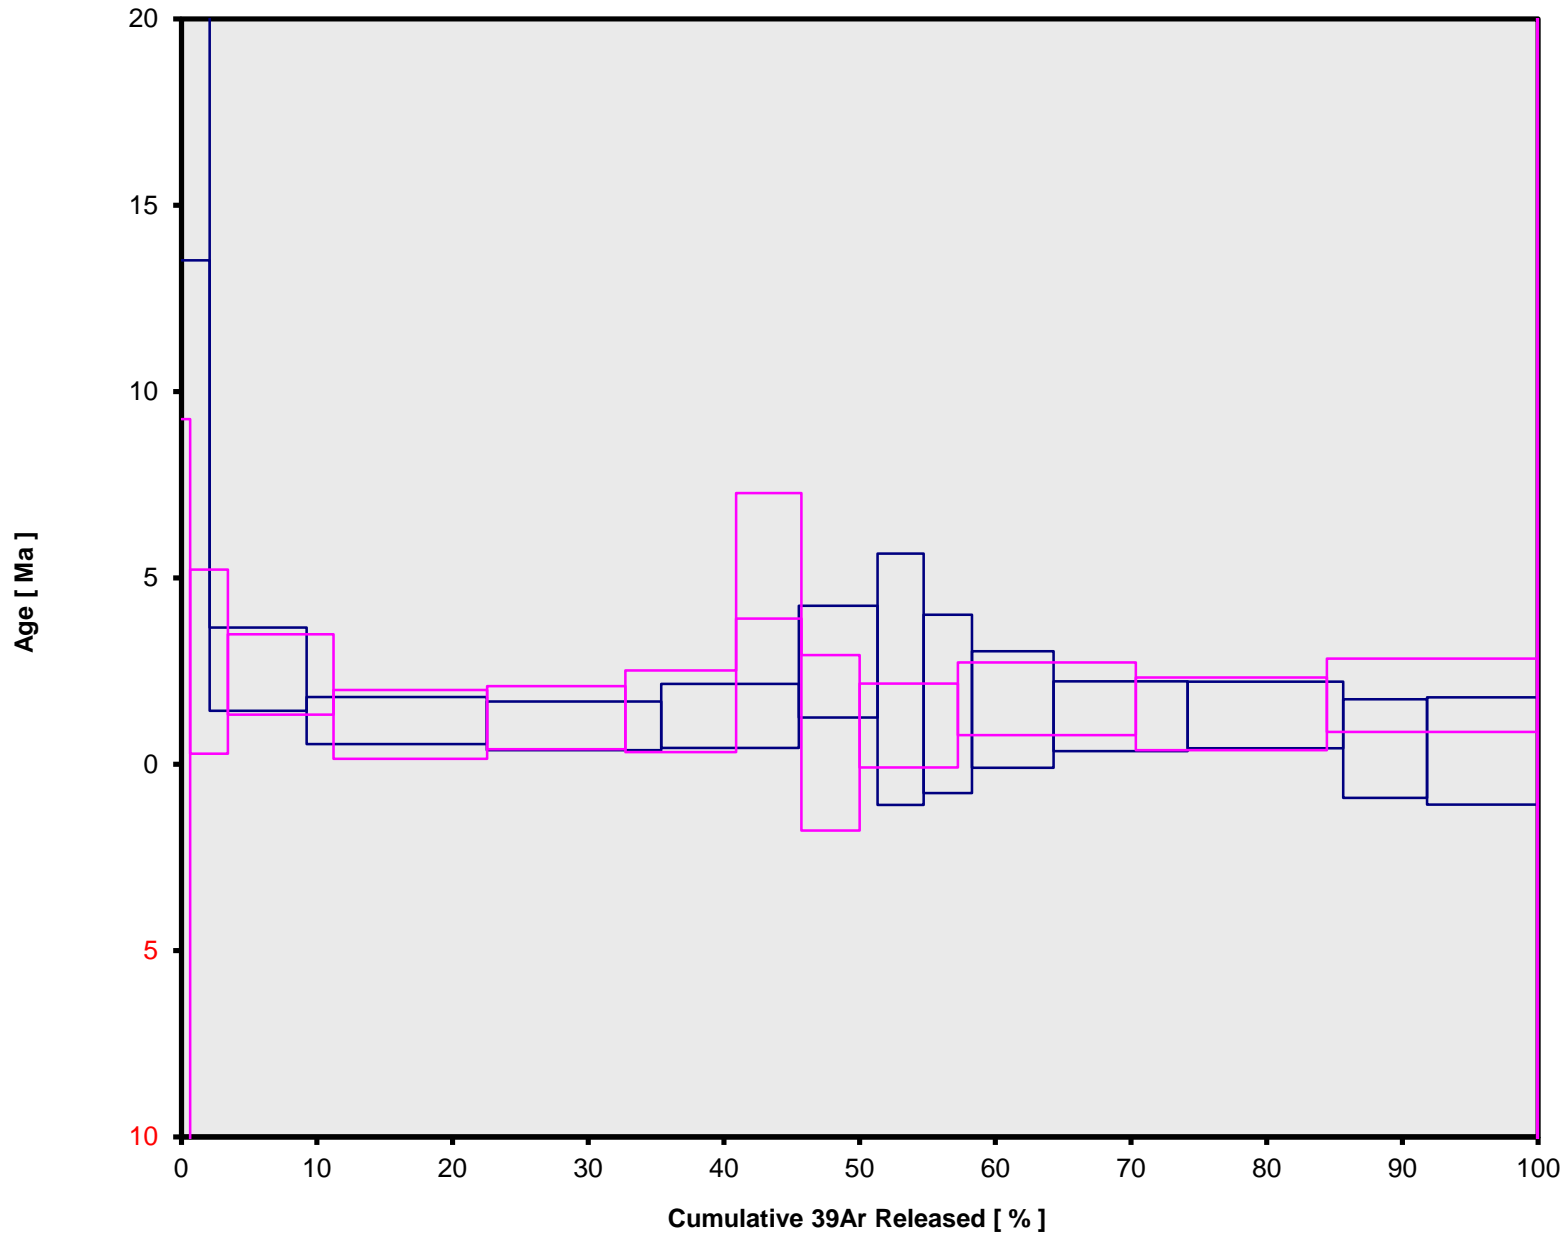

Ar-Ages in Ma

WEIGHTED PLATEAU

$1.33 \pm 0.23$

TOTAL FUSION

$1.72 \pm 0.27$

NORMAL ISOCHRON

$1.26 \pm 0.30$

INVERSE ISOCHRON

$1.34 \pm 0.13$

MSWD

0.87

Sample Info

plg

Furnace

Eric Thern

IRR = 18t2h

$J = 0.00069900 \pm$

$0.00000203$

**VERATI-COMBOPLGD+E.AGE >>> PLG-D >>> ANTILLES-NICE PROJECT**

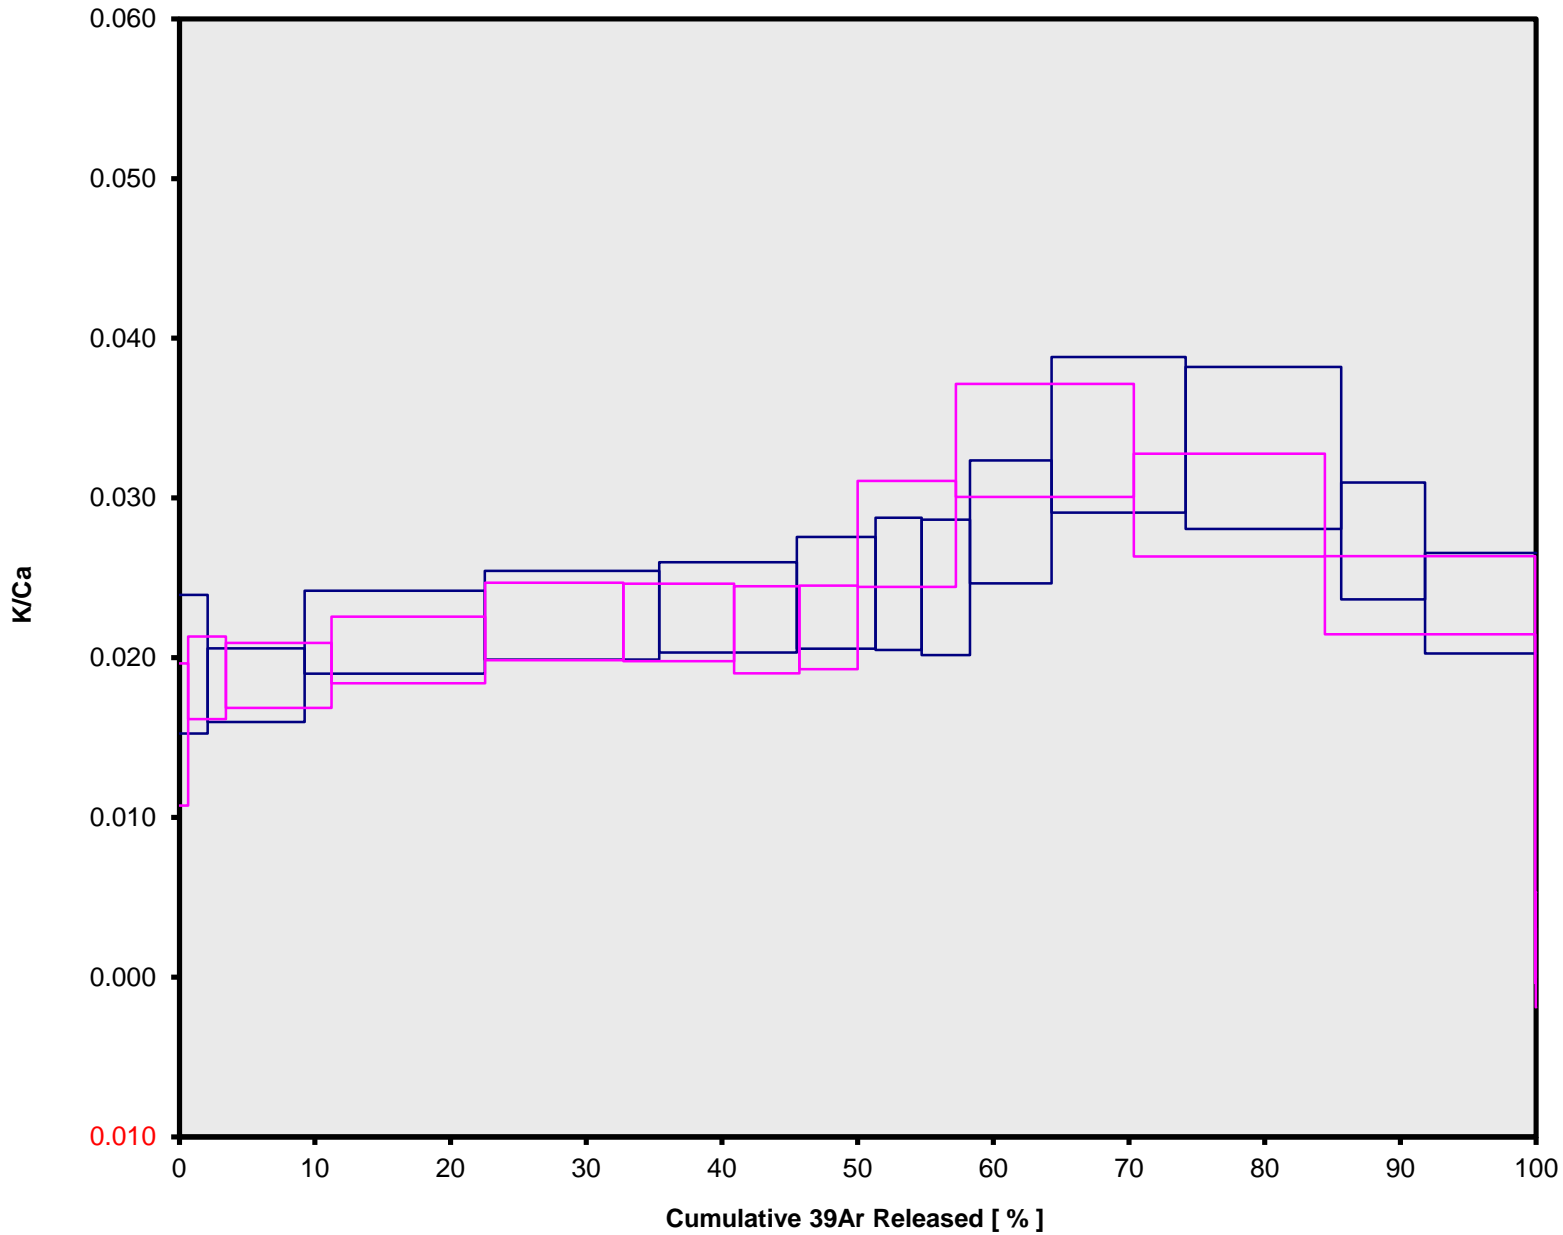

**Ar-Ages in Ma**

**WEIGHTED PLATEAU**  
**1.33 ± 0.23**

**TOTAL FUSION**  
**1.72 ± 0.27**

**NORMAL ISOCHRON**  
**1.26 ± 0.30**

**INVERSE ISOCHRON**  
**1.34 ± 0.13**

**Sample Info**

**plg**  
**Furnace**  
**Eric Thern**

**IRR = 18t2h**  
**J = 0.00069900 ±**  
**0.00000203**

VERATI-COMBOPLGD+E.AGE >>> PLG-D >>> ANTILLES-NICE PROJECT

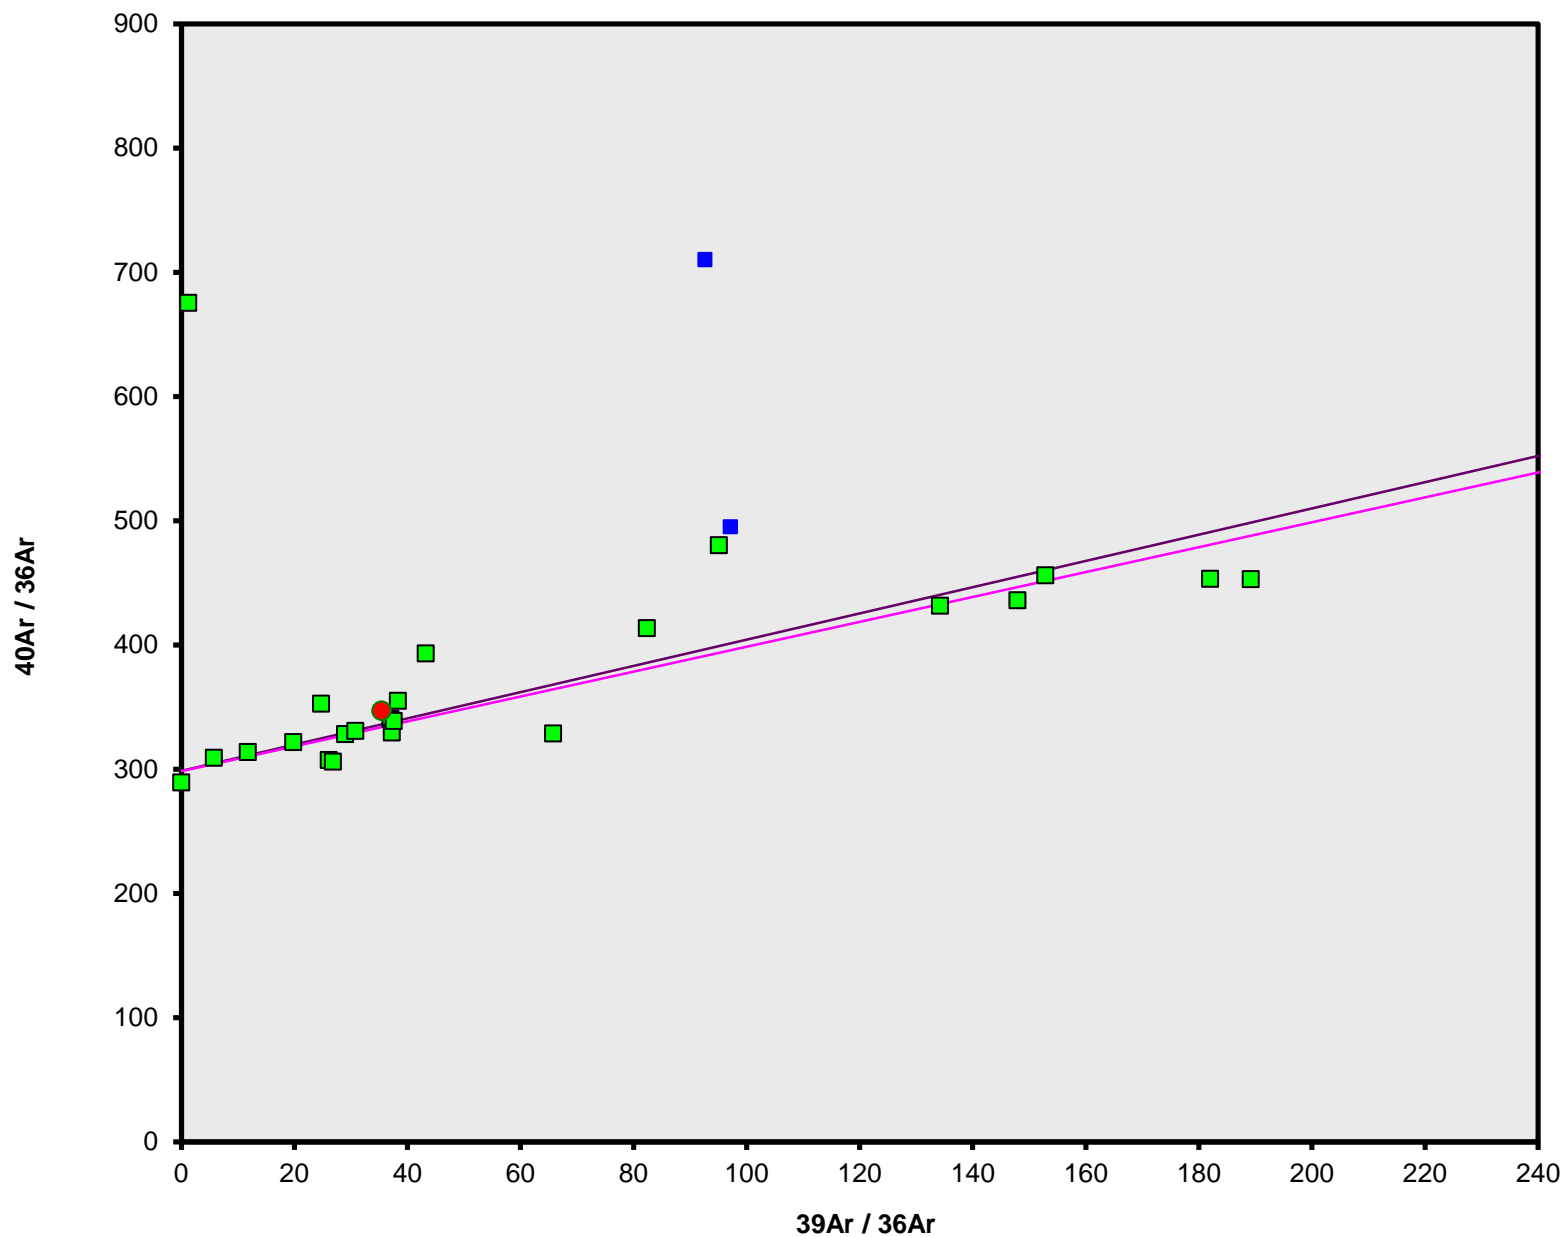

Ar-Ages in Ma

WEIGHTED PLATEAU

$1.33 \pm 0.23$

TOTAL FUSION

$1.72 \pm 0.27$

NORMAL ISOCHRON

$1.26 \pm 0.30$

INVERSE ISOCHRON

$1.34 \pm 0.13$

MSWD

0.81

40AR/36AR

INTERCEPT

$298.3 \pm 8.2$

Sample Info

plg

Furnace

Eric Thern

IRR = 18t2h

$J = 0.00069900 \pm$

$0.00000203$



VERATI-COMBOPLGD+E.AGE >>> PLG-D >>> ANTILLES-NICE PROJECT

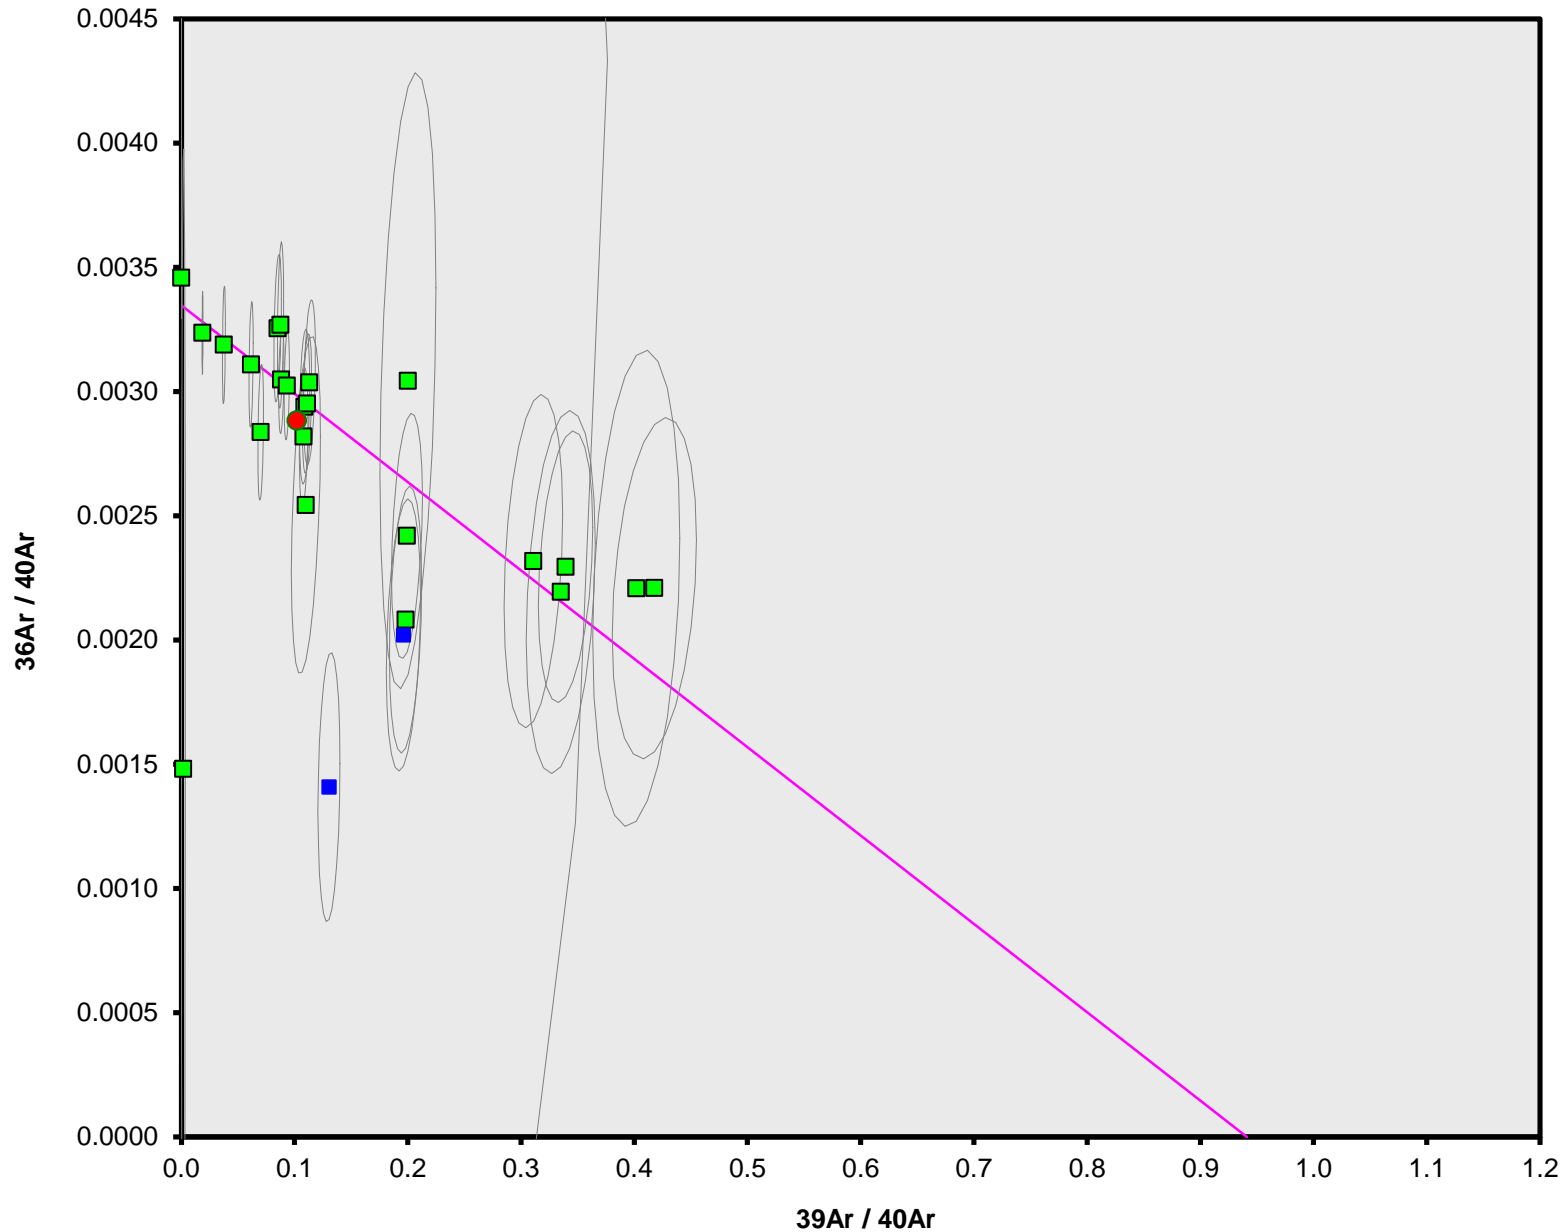

Ar-Ages in Ma

WEIGHTED PLATEAU

$1.33 \pm 0.23$

TOTAL FUSION

$1.72 \pm 0.27$

NORMAL ISOCHRON

$1.26 \pm 0.30$

INVERSE ISOCHRON

$1.34 \pm 0.13$

MSWD

0.99

40AR/36AR

INTERCEPT

$298.8 \pm 4.1$

Sample Info

plg

Furnace

Eric Thern

IRR = 18t2h

$J = 0.00069900 \pm$

$0.00000203$
