# Supplementary material
Source: publisher figshare collection journal article supplement (https://geolsoc.figshare.com/articles/dataset/_/3453656)
Supplement: Supplementary file 2 [file 1]

| Incremental Heating |         | 36Ar(a)  | 37Ar(ca) | 38Ar(cl) | 39Ar(k)  | 40Ar(r)  | Age ± 2σ (Ma)  | 40Ar(r) (%) | 39Ar(k) (%) | K/Ca ± 2σ   |
|---------------------|---------|----------|----------|----------|----------|----------|----------------|-------------|-------------|-------------|
| M1869-01            | 650 °C  | 0.000156 | 0.000450 | 0.000010 | 0.000010 | 0.001895 | 91.69 ± 457.15 | 3.91        | 0.01        | 1.89 ± 3.89 |
| M1869-06            | 700 °C  | 0.000001 | 0.001068 | 0.000000 | 0.000096 | 0.001997 | 10.33 ± 27.70  | 118.88      | 0.06        | 7.62 ± 2.53 |
| M1869-07            | 750 °C  | 0.000457 | 0.067937 | 0.000000 | 0.003790 | 0.014905 | 1.95 ± 3.07    | 9.85        | 2.26        | 4.74 ± 0.63 |
| M1869-08            | 800 °C  | 0.000130 | 0.134476 | 0.000000 | 0.007024 | 0.024990 | 1.77 ± 0.73    | 39.20       | 4.18        | 4.44 ± 0.59 |
| M1869-09            | 900 °C  | 0.000300 | 0.531825 | 0.000000 | 0.027052 | 0.104438 | 1.92 ± 0.43    | 53.78       | 16.10       | 4.32 ± 0.57 |
| M1869-10            | 1000 °C | 0.000362 | 0.862541 | 0.000000 | 0.043821 | 0.170949 | 1.94 ± 0.35    | 61.27       | 26.08       | 4.32 ± 0.57 |
| M1869-11            | 1130 °C | 0.000230 | 0.578576 | 0.000000 | 0.030405 | 0.118924 | 1.94 ± 0.34    | 63.43       | 18.09       | 4.47 ± 0.59 |
| M1869-12            | 1280 °C | 0.000329 | 0.414769 | 0.000000 | 0.022444 | 0.087324 | 1.93 ± 0.50    | 47.07       | 13.36       | 4.60 ± 0.61 |
| M1869-13            | 1430 °C | 0.000351 | 0.670421 | 0.000000 | 0.033400 | 0.134228 | 2.00 ± 0.41    | 56.14       | 19.88       | 4.23 ± 0.56 |
| Σ                   |         | 0.002313 | 3.261163 | 0.000010 | 0.168043 | 0.659649 |                |             |             |             |

**Information on Analysis**

Sample = ALE-7  
 Material = Plagioclases  
 Location = Guadeloupe  
 Analyst = Chrystèle VERATI  
 Project = CHRYSTELE  
 Mass Discrimination Law = LIN  
 Irradiation = MC46  
 J = 0.00027562 ± 0.00000138  
 ACS-2 = 1.193 ± 0.001 Ma

| Results                 | 40(r)/39(k) ± 2σ           | Age ± 2σ (Ma)                                            | MSWD           | 39Ar(k) (% , n)                            | K/Ca ± 2σ   |
|-------------------------|----------------------------|----------------------------------------------------------|----------------|--------------------------------------------|-------------|
| <b>Age Plateau</b>      | 3.8981 ± 0.3431<br>± 8.80% | 1.94 ± 0.17<br>± 8.85%                                   | 0.06           | 97.68<br>6                                 | 4.39 ± 0.24 |
|                         |                            | Minimal External Error ± 0.17<br>Analytical Error ± 0.17 | 2.57<br>1.0000 | Statistical T Ratio<br>Error Magnification |             |
| <b>Total Fusion Age</b> | 3.9255 ± 0.3734<br>± 9.51% | 1.95 ± 0.19<br>± 9.56%                                   |                | 9                                          | 4.38 ± 0.30 |
|                         |                            | Minimal External Error ± 0.19<br>Analytical Error ± 0.19 |                |                                            |             |

| <b>Normal Isochron</b> |         | 39(k)/36(a) ± 2σ | 40(a+r)/36(a) ± 2σ | r.i.   |
|------------------------|---------|------------------|--------------------|--------|
| M1869-01               | 650 °C  | 0.1 ± 0.1        | 310.7 ± 59.5       | 0.0959 |
| M1869-06               | 700 °C  | 90.2 ± 1520.1    | 1581.0 ± 26647.9   | 0.9999 |
| M1869-07               | 750 °C  | 8.3 ± 1.5        | 331.2 ± 56.8       | 0.9724 |
| M1869-08               | 800 °C  | 54.1 ± 14.5      | 491.1 ± 130.4      | 0.9882 |
| M1869-09               | 900 °C  | 90.0 ± 23.4      | 646.1 ± 165.6      | 0.9877 |
| M1869-10               | 1000 °C | 121.1 ± 33.9     | 771.0 ± 213.9      | 0.9894 |
| M1869-11               | 1130 °C | 132.4 ± 39.0     | 816.6 ± 237.9      | 0.9904 |
| M1869-12               | 1280 °C | 68.2 ± 15.7      | 564.1 ± 127.9      | 0.9843 |
| M1869-13               | 1430 °C | 95.1 ± 24.7      | 680.9 ± 174.4      | 0.9876 |

| <b>Results</b>         | 40(a)/36(a) ± 2σ                                                    | 40(r)/39(k) ± 2σ            | Age ± 2σ (Ma)                                            | MSWD                                  |
|------------------------|---------------------------------------------------------------------|-----------------------------|----------------------------------------------------------|---------------------------------------|
| <b>Normal Isochron</b> | 280.7931 ± 106.9879<br>± 38.10%                                     | 4.0749 ± 1.1396<br>± 27.97% | 2.03 ± 0.57<br>± 27.97%                                  | 0.06                                  |
|                        |                                                                     |                             | Minimal External Error ± 0.57<br>Analytical Error ± 0.57 |                                       |
| <b>Statistics</b>      | Statistical F ratio<br>Error Magnification<br>Number of Data Points | 2.37<br>1.0000<br>6         | Convergence<br>Number of Iterations<br>Calculated Line   | 0.0000386305<br>17<br>Weighted York-2 |

| Inverse Isochron |         | 39(k)/40(a+r) ± 2σ  | 36(a)/40(a+r) ± 2σ  | r.i.   |
|------------------|---------|---------------------|---------------------|--------|
| M1869-01         | 650 °C  | 0.000207 ± 0.000411 | 0.003218 ± 0.000617 | 0.0000 |
| M1869-06         | 700 °C  | 0.057038 ± 0.013381 | 0.000633 ± 0.010662 | 0.0006 |
| M1869-07         | 750 °C  | 0.025054 ± 0.001031 | 0.003019 ± 0.000518 | 0.0002 |
| M1869-08         | 800 °C  | 0.110189 ± 0.004543 | 0.002036 ± 0.000541 | 0.0004 |
| M1869-09         | 900 °C  | 0.139334 ± 0.005664 | 0.001548 ± 0.000397 | 0.0002 |
| M1869-10         | 1000 °C | 0.157078 ± 0.006383 | 0.001297 ± 0.000360 | 0.0001 |
| M1869-11         | 1130 °C | 0.162194 ± 0.006594 | 0.001225 ± 0.000357 | 0.0002 |
| M1869-12         | 1280 °C | 0.120987 ± 0.004916 | 0.001773 ± 0.000402 | 0.0001 |
| M1869-13         | 1430 °C | 0.139722 ± 0.005677 | 0.001469 ± 0.000376 | 0.0001 |

| Results          | 40(a)/36(a) ± 2σ                                                    | 40(r)/39(k) ± 2σ            | Age ± 2σ (Ma)                                            | MSWD                                 |
|------------------|---------------------------------------------------------------------|-----------------------------|----------------------------------------------------------|--------------------------------------|
| Inverse Isochron | 282.1430 ± 54.7544<br>± 19.41%                                      | 4.0660 ± 0.5764<br>± 14.18% | 2.02 ± 0.29<br>± 14.20%                                  | 0.06                                 |
|                  |                                                                     |                             | Minimal External Error ± 0.29<br>Analytical Error ± 0.29 |                                      |
| Statistics       | Statistical F ratio<br>Error Magnification<br>Number of Data Points | 2.37<br>1.0000<br>6         | Convergence<br>Number of Iterations<br>Calculated Line   | 0.0001903469<br>3<br>Weighted York-2 |

| Relative Abundances |         | 36Ar      | %1σ      | 37Ar      | %1σ    | 38Ar      | %1σ    | 39Ar      | %1σ     | 40Ar      | %1σ   | Age ± 2σ (Ma)  | 40Ar(r) (%) | 39Ar(k) (%) | K/Ca ± 2σ   |
|---------------------|---------|-----------|----------|-----------|--------|-----------|--------|-----------|---------|-----------|-------|----------------|-------------|-------------|-------------|
| M1869-01            | 650 °C  | 0.0001559 | 9.588    | 0.0004502 | 26.838 | 0.0000371 | 39.914 | 0.0000097 | 102.734 | 0.0484872 | 0.185 | 91.69 ± 457.15 | 3.91        | 0.01        | 1.89 ± 3.89 |
| M1869-06            | 700 °C  | 0.0000008 | 1176.356 | 0.0010682 | 11.816 | 0.0000241 | 73.571 | 0.0000966 | 11.397  | 0.0016796 | 2.358 | 10.33 ± 27.70  | 118.88      | 0.06        | 7.62 ± 2.53 |
| M1869-07            | 750 °C  | 0.0004760 | 8.227    | 0.0679368 | 5.939  | 0.0001600 | 9.009  | 0.0038399 | 2.027   | 0.1512891 | 0.064 | 1.95 ± 3.07    | 9.85        | 2.26        | 4.74 ± 0.63 |
| M1869-08            | 800 °C  | 0.0001677 | 10.181   | 0.1344762 | 5.937  | 0.0001126 | 12.487 | 0.0071217 | 2.028   | 0.0637474 | 0.102 | 1.77 ± 0.73    | 39.20       | 4.18        | 4.44 ± 0.59 |
| M1869-09            | 900 °C  | 0.0004505 | 8.311    | 0.5318251 | 5.933  | 0.0004251 | 5.523  | 0.0274407 | 2.000   | 0.1941823 | 0.071 | 1.92 ± 0.43    | 53.78       | 16.10       | 4.32 ± 0.57 |
| M1869-10            | 1000 °C | 0.0006051 | 7.933    | 0.8625411 | 5.932  | 0.0006413 | 4.586  | 0.0444510 | 2.000   | 0.2790213 | 0.050 | 1.94 ± 0.35    | 61.27       | 26.08       | 4.32 ± 0.57 |
| M1869-11            | 1130 °C | 0.0003927 | 8.139    | 0.5785760 | 5.934  | 0.0004689 | 5.828  | 0.0308277 | 2.001   | 0.1874928 | 0.073 | 1.94 ± 0.34    | 63.43       | 18.09       | 4.47 ± 0.59 |
| M1869-12            | 1280 °C | 0.0004458 | 8.214    | 0.4147692 | 5.934  | 0.0003544 | 6.539  | 0.0227471 | 2.002   | 0.1855321 | 0.056 | 1.93 ± 0.50    | 47.07       | 13.36       | 4.60 ± 0.61 |
| M1869-13            | 1430 °C | 0.0005401 | 8.053    | 0.6704209 | 5.933  | 0.0005443 | 4.867  | 0.0338895 | 1.999   | 0.2390812 | 0.058 | 2.00 ± 0.41    | 56.14       | 19.88       | 4.23 ± 0.56 |
| Σ                   |         | 0.0032331 | 3.107    | 3.2611633 | 2.577  | 0.0027195 | 2.423  | 0.1704239 | 0.863   | 1.3505129 | 0.025 |                |             |             |             |

### Information on Analysis and Constants Used in Calculations

Sample = ALE-7  
Material = Plagioclases  
Location = Guadeloupe  
Analyst = Chrystèle VERATI  
Project = CHRYSTELE  
Mass Discrimination Law = LIN  
Irradiation = MC46  
J = 0.00027562 ± 0.00000138  
ACS-2 = 1.193 ± 0.001 Ma  
IGSN = Undefined  
Preferred Age = Undefined  
Classification = Undefined  
Experiment Type = Undefined  
Extraction Method = Undefined  
Heating = 60 sec  
Isolation = 2.00 min  
Instrument = VG3600  
Lithology = Undefined  
Lat-Lon = Undefined - Undefined

Age Equations = Conventional  
Negative Intensities = Allowed  
Decay Constant 40K = 5.543 ± 0.010 E-10 1/a  
Decay Constant 39Ar = 2.940 ± 0.029 E-07 1/h  
Decay Constant 37Ar = 8.220 ± 0.010 E-04 1/h  
Decay Constant 36Cl = 2.310 ± 0.016 E-06 1/a  
Production Ratio 36/38 in Cl = 316.0 ± 15.8

### Results

|                         | 40(r)/39(k) ± 2σ              | Age ± 2σ (Ma)           | MSWD   | 39Ar(k) (%),n       | K/Ca ± 2σ   |
|-------------------------|-------------------------------|-------------------------|--------|---------------------|-------------|
| <b>Age Plateau</b>      | 3.8981 ± 0.3431<br>± 8.80%    | 1.94 ± 0.17<br>± 8.85%  | 0.06   | 97.68<br>6          | 4.39 ± 0.24 |
|                         | Minimal External Error ± 0.17 |                         | 2.57   | Statistical T Ratio |             |
|                         | Analytical Error ± 0.17       |                         | 1.0000 | Error Magnification |             |
| <b>Total Fusion Age</b> | 3.9255 ± 0.3734<br>± 9.51%    | 1.95 ± 0.19<br>± 9.56%  |        | 9                   | 4.38 ± 0.30 |
|                         | Minimal External Error ± 0.19 |                         |        |                     |             |
|                         | Analytical Error ± 0.19       |                         |        |                     |             |
| <b>Normal Isochron</b>  | 4.0749 ± 1.1396<br>± 27.97%   | 2.03 ± 0.57<br>± 27.97% | 0.06   | 97.68<br>6          |             |
|                         | Minimal External Error ± 0.57 |                         | 2.37   | Statistical F ratio |             |
|                         | Analytical Error ± 0.57       |                         | 1.0000 | Error Magnification |             |
| <b>Inverse Isochron</b> | 4.0660 ± 0.5764<br>± 14.18%   | 2.02 ± 0.29<br>± 14.20% | 0.06   | 97.68<br>6          |             |
|                         | Minimal External Error ± 0.29 |                         | 2.37   | Statistical F ratio |             |
|                         | Analytical Error ± 0.29       |                         | 1.0000 | Error Magnification |             |

| Degassing Patterns |         | 36Ar(a)  | %1σ      | 36Ar(c)  | %1σ      | 36Ar(ca) | %1σ      | 36Ar(cl) | %1σ      | 37Ar(ca) | %1σ      |      |
|--------------------|---------|----------|----------|----------|----------|----------|----------|----------|----------|----------|----------|------|
| M1869-01           | 650 °C  | 0.000156 | 9.58     | 0.000000 | 0.00     | 0.000000 | 26.86    | 0.000000 | 149.34   | 0.000450 | 26.84    |      |
| M1869-06           | 700 °C  | 0.000001 | 842.78   | 0.000000 | 0.00     | 0.000000 | 11.86    | 0.000000 | 0.00     | 0.001068 | 11.82    |      |
| M1869-07           | 750 °C  | 0.000457 | 8.58     | 0.000000 | 0.00     | 0.000019 | 6.02     | 0.000000 | 0.00     | 0.067937 | 5.94     |      |
| M1869-08           | 800 °C  | 0.000130 | 13.27    | 0.000000 | 0.00     | 0.000038 | 6.02     | 0.000000 | 0.00     | 0.134476 | 5.94     |      |
| M1869-09           | 900 °C  | 0.000300 | 12.82    | 0.000000 | 0.00     | 0.000150 | 6.02     | 0.000000 | 0.00     | 0.531825 | 5.93     |      |
| M1869-10           | 1000 °C | 0.000362 | 13.87    | 0.000000 | 0.00     | 0.000243 | 6.02     | 0.000000 | 0.00     | 0.862541 | 5.93     |      |
| M1869-11           | 1130 °C | 0.000230 | 14.57    | 0.000000 | 0.00     | 0.000163 | 6.02     | 0.000000 | 0.00     | 0.578576 | 5.93     |      |
| M1869-12           | 1280 °C | 0.000329 | 11.34    | 0.000000 | 0.00     | 0.000117 | 6.02     | 0.000000 | 0.00     | 0.414769 | 5.93     |      |
| M1869-13           | 1430 °C | 0.000351 | 12.81    | 0.000000 | 0.00     | 0.000189 | 6.02     | 0.000000 | 0.00     | 0.670421 | 5.93     |      |
|                    |         | Σ        | 0.002313 | 4.46     | 0.000000 | 0.00     | 0.000920 | 2.61     | 0.000000 | 149.34   | 3.261163 | 2.58 |
|                    |         | Σ        |          |          |          |          |          |          | 0.003233 | 3.28     | 3.261163 | 2.58 |

| 38Ar(a)  | %1σ    | 38Ar(c)  | %1σ  | 38Ar(k)  | %1σ   | 38Ar(ca) | %1σ   | 38Ar(cl) | %1σ    |
|----------|--------|----------|------|----------|-------|----------|-------|----------|--------|
| 0.000029 | 9.58   | 0.000000 | 0.00 | 0.000000 | 99.39 | 0.000003 | 93.92 | 0.000010 | 149.67 |
| 0.000000 | 842.78 | 0.000000 | 0.00 | 0.000001 | 11.66 | 0.000006 | 90.77 | 0.000000 | 0.00   |
| 0.000086 | 8.58   | 0.000000 | 0.00 | 0.000045 | 2.87  | 0.000408 | 90.20 | 0.000000 | 0.00   |
| 0.000024 | 13.27  | 0.000000 | 0.00 | 0.000084 | 2.87  | 0.000807 | 90.20 | 0.000000 | 0.00   |
| 0.000057 | 12.82  | 0.000000 | 0.00 | 0.000325 | 2.85  | 0.003191 | 90.20 | 0.000000 | 0.00   |
| 0.000068 | 13.87  | 0.000000 | 0.00 | 0.000526 | 2.85  | 0.005175 | 90.20 | 0.000000 | 0.00   |
| 0.000043 | 14.57  | 0.000000 | 0.00 | 0.000365 | 2.85  | 0.003471 | 90.20 | 0.000000 | 0.00   |
| 0.000062 | 11.34  | 0.000000 | 0.00 | 0.000269 | 2.85  | 0.002489 | 90.20 | 0.000000 | 0.00   |
| 0.000066 | 12.81  | 0.000000 | 0.00 | 0.000401 | 2.85  | 0.004023 | 90.20 | 0.000000 | 0.00   |
| 0.000436 | 4.46   | 0.000000 | 0.00 | 0.002017 | 1.23  | 0.019567 | 39.17 | 0.000010 | 149.67 |
|          |        |          |      |          |       |          |       | 0.022030 | 34.79  |

| 39Ar(k)  | %1σ   | 39Ar(ca) | %1σ   | 40Ar(r)  | %1σ    | 40Ar(a)  | %1σ    | 40Ar(c)  | %1σ  | 40Ar(k)  | %1σ   |
|----------|-------|----------|-------|----------|--------|----------|--------|----------|------|----------|-------|
| 0.000010 | 99.37 | 0.000000 | 27.13 | 0.001895 | 235.58 | 0.046592 | 9.58   | 0.000000 | 0.00 | 0.000000 | 99.41 |
| 0.000096 | 11.49 | 0.000001 | 12.47 | 0.001997 | 133.89 | 0.000317 | 842.78 | 0.000000 | 0.00 | 0.000000 | 11.88 |
| 0.003790 | 2.06  | 0.000050 | 7.16  | 0.014905 | 78.48  | 0.136381 | 8.58   | 0.000000 | 0.00 | 0.000004 | 3.64  |
| 0.007024 | 2.06  | 0.000098 | 7.16  | 0.024990 | 20.58  | 0.038751 | 13.27  | 0.000000 | 0.00 | 0.000007 | 3.64  |
| 0.027052 | 2.03  | 0.000388 | 7.16  | 0.104438 | 11.01  | 0.089717 | 12.82  | 0.000000 | 0.00 | 0.000027 | 3.62  |
| 0.043821 | 2.03  | 0.000630 | 7.15  | 0.170949 | 8.76   | 0.108028 | 13.87  | 0.000000 | 0.00 | 0.000044 | 3.62  |
| 0.030405 | 2.03  | 0.000422 | 7.16  | 0.118924 | 8.40   | 0.068539 | 14.57  | 0.000000 | 0.00 | 0.000030 | 3.62  |
| 0.022444 | 2.03  | 0.000303 | 7.16  | 0.087324 | 12.75  | 0.098185 | 11.34  | 0.000000 | 0.00 | 0.000022 | 3.62  |
| 0.033400 | 2.03  | 0.000489 | 7.16  | 0.134228 | 10.00  | 0.104820 | 12.81  | 0.000000 | 0.00 | 0.000033 | 3.62  |
| 0.168043 | 0.88  | 0.002381 | 3.11  | 0.659649 | 4.67   | 0.690695 | 4.46   | 0.000000 | 0.00 | 0.000168 | 1.56  |
|          |       | 0.170424 | 0.87  |          |        |          |        |          |      | 1.350513 | 3.23  |

| Additional Parameters |         | 40(r)/39(k)              | 1 $\sigma$ | 40(r+a)  | 1 $\sigma$ | 40Ar/39Ar   | 1 $\sigma$ | 37Ar/39Ar        | 1 $\sigma$ | 36Ar/39Ar       | 1 $\sigma$ |
|-----------------------|---------|--------------------------|------------|----------|------------|-------------|------------|------------------|------------|-----------------|------------|
| M1869-01              | 650 °C  | 189.162153               | 483.64949  | 0.048487 | 0.00009    | 5003.655464 | 5140.48524 | <b>46.462606</b> | 49.33492   | 16.091372       | 16.60322   |
| M1869-06              | 700 °C  | 20.843125                | 28.00926   | 0.001679 | 0.00004    | 17.391626   | 2.02410    | 11.061578        | 1.81592    | <b>0.007881</b> | 0.09271    |
| M1869-07              | 750 °C  | 3.932334                 | 3.08698    | 0.151285 | 0.00010    | 39.399578   | 0.79915    | 17.692493        | 1.11035    | 0.123950        | 0.01050    |
| M1869-08              | 800 °C  | <a href="#">3.558005</a> | 0.73604    | 0.063740 | 0.00006    | 8.951174    | 0.18176    | 18.882651        | 1.18475    | 0.023550        | 0.00244    |
| M1869-09              | 900 °C  | <a href="#">3.860584</a> | 0.43224    | 0.194155 | 0.00014    | 7.076430    | 0.14162    | 19.380880        | 1.21335    | 0.016416        | 0.00140    |
| M1869-10              | 1000 °C | <a href="#">3.901044</a> | 0.35096    | 0.278977 | 0.00014    | 6.277053    | 0.12557    | 19.404311        | 1.21480    | 0.013612        | 0.00111    |
| M1869-11              | 1130 °C | <a href="#">3.911271</a> | 0.33785    | 0.187462 | 0.00014    | 6.081959    | 0.12180    | 18.768054        | 1.17531    | 0.012739        | 0.00107    |
| M1869-12              | 1280 °C | <a href="#">3.890704</a> | 0.50236    | 0.185510 | 0.00010    | 8.156290    | 0.16333    | 18.233918        | 1.14187    | 0.019599        | 0.00166    |
| M1869-13              | 1430 °C | <a href="#">4.018789</a> | 0.41012    | 0.239048 | 0.00014    | 7.054722    | 0.14106    | 19.782543        | 1.23854    | 0.015938        | 0.00132    |



| Time<br>(days) | 37Ar<br>(decay) | 39Ar<br>(decay) | 40Ar<br>(moles) |
|----------------|-----------------|-----------------|-----------------|
| 119.646        | 10.59998368     | 1.00084475      | 9.697E-16       |
| 120.735        | 10.83030000     | 1.00085244      | 3.359E-17       |
| 120.669        | 10.81606535     | 1.00085197      | 3.026E-15       |
| 120.685        | 10.81962226     | 1.00085209      | 1.275E-15       |
| 120.703        | 10.82332862     | 1.00085221      | 3.884E-15       |
| 120.720        | 10.82703624     | 1.00085234      | 5.580E-15       |
| 120.737        | 10.83059676     | 1.00085245      | 3.750E-15       |
| 120.755        | 10.83445530     | 1.00085258      | 3.711E-15       |
| 120.772        | 10.83801826     | 1.00085270      | 4.782E-15       |

| Procedure<br>Blanks |         | 36Ar     | 1σ       | 37Ar     | 1σ       | 38Ar     | 1σ       | 39Ar     | 1σ       | 40Ar     | 1σ       |
|---------------------|---------|----------|----------|----------|----------|----------|----------|----------|----------|----------|----------|
| M1869-01            | 650 °C  | 0.000064 | 0.000006 | 0.000193 | 0.000008 | 0.000019 | 0.000010 | 0.000027 | 0.000006 | 0.005884 | 0.000031 |
| M1869-06            | 700 °C  | 0.000065 | 0.000006 | 0.000190 | 0.000008 | 0.000036 | 0.000009 | 0.000025 | 0.000006 | 0.006959 | 0.000031 |
| M1869-07            | 750 °C  | 0.000081 | 0.000010 | 0.000175 | 0.000012 | 0.000017 | 0.000010 | 0.000035 | 0.000008 | 0.011803 | 0.000034 |
| M1869-08            | 800 °C  | 0.000081 | 0.000010 | 0.000175 | 0.000012 | 0.000017 | 0.000010 | 0.000035 | 0.000008 | 0.011803 | 0.000034 |
| M1869-09            | 900 °C  | 0.000081 | 0.000010 | 0.000175 | 0.000012 | 0.000017 | 0.000010 | 0.000035 | 0.000008 | 0.011803 | 0.000034 |
| M1869-10            | 1000 °C | 0.000062 | 0.000006 | 0.000179 | 0.000008 | 0.000019 | 0.000010 | 0.000050 | 0.000007 | 0.007024 | 0.000027 |
| M1869-11            | 1130 °C | 0.000062 | 0.000006 | 0.000179 | 0.000008 | 0.000019 | 0.000010 | 0.000050 | 0.000007 | 0.007024 | 0.000027 |
| M1869-12            | 1280 °C | 0.000056 | 0.000008 | 0.000170 | 0.000010 | 0.000046 | 0.000014 | 0.000037 | 0.000009 | 0.008251 | 0.000019 |
| M1869-13            | 1430 °C | 0.000061 | 0.000006 | 0.000173 | 0.000006 | 0.000025 | 0.000006 | 0.000028 | 0.000008 | 0.009033 | 0.000027 |

| Sample Parameters | Sample  | Material | Location     | Analyst    | Temp             |      |
|-------------------|---------|----------|--------------|------------|------------------|------|
| M1869-01          | 650 °C  | ALE-7    | Plagioclases | Guadeloupe | Chrystèle VERATI | 650  |
| M1869-06          | 700 °C  | ALE-7    | Plagioclases | Guadeloupe | Chrystèle VERATI | 700  |
| M1869-07          | 750 °C  | ALE-7    | Plagioclases | Guadeloupe | Chrystèle VERATI | 750  |
| M1869-08          | 800 °C  | ALE-7    | Plagioclases | Guadeloupe | Chrystèle VERATI | 800  |
| M1869-09          | 900 °C  | ALE-7    | Plagioclases | Guadeloupe | Chrystèle VERATI | 900  |
| M1869-10          | 1000 °C | ALE-7    | Plagioclases | Guadeloupe | Chrystèle VERATI | 1000 |
| M1869-11          | 1130 °C | ALE-7    | Plagioclases | Guadeloupe | Chrystèle VERATI | 1130 |
| M1869-12          | 1280 °C | ALE-7    | Plagioclases | Guadeloupe | Chrystèle VERATI | 1280 |
| M1869-13          | 1430 °C | ALE-7    | Plagioclases | Guadeloupe | Chrystèle VERATI | 1430 |

| Standard<br>(in Ma) | %1 $\sigma$ | J          | %1 $\sigma$ | MDF      | %1 $\sigma$ | Volume<br>Ratio | Sensitivity<br>(mol/volt) |
|---------------------|-------------|------------|-------------|----------|-------------|-----------------|---------------------------|
| 1.193               | 0.1         | 0.00027562 | 0.5         | 1.005643 | 2           | 1               | 2.000E-14                 |
| 1.193               | 0.1         | 0.00027562 | 0.5         | 1.005643 | 2           | 1               | 2.000E-14                 |
| 1.193               | 0.1         | 0.00027562 | 0.5         | 1.005643 | 2           | 1               | 2.000E-14                 |
| 1.193               | 0.1         | 0.00027562 | 0.5         | 1.005643 | 2           | 1               | 2.000E-14                 |
| 1.193               | 0.1         | 0.00027562 | 0.5         | 1.005643 | 2           | 1               | 2.000E-14                 |
| 1.193               | 0.1         | 0.00027562 | 0.5         | 1.005643 | 2           | 1               | 2.000E-14                 |
| 1.193               | 0.1         | 0.00027562 | 0.5         | 1.005643 | 2           | 1               | 2.000E-14                 |
| 1.193               | 0.1         | 0.00027562 | 0.5         | 1.005643 | 2           | 1               | 2.000E-14                 |
| 1.193               | 0.1         | 0.00027562 | 0.5         | 1.005643 | 2           | 1               | 2.000E-14                 |
| 1.193               | 0.1         | 0.00027562 | 0.5         | 1.005643 | 2           | 1               | 2.000E-14                 |

| Day | Month | Year | Hour | Min | Resist | Irradiation | Project | Experiment | Nmb | Standard Name |
|-----|-------|------|------|-----|--------|-------------|---------|------------|-----|---------------|
| 20  | JUL   | 2005 | 05   | 01  | 001    | MC46        | Chryste | M1869c     | 01  | ACS-2         |
| 21  | JUL   | 2005 | 07   | 10  | 001    | MC46        | Chryste | M1869c     | 01  | ACS-2         |
| 21  | JUL   | 2005 | 05   | 34  | 001    | MC46        | Chryste | M1869c     | 01  | ACS-2         |
| 21  | JUL   | 2005 | 05   | 58  | 001    | MC46        | Chryste | M1869c     | 01  | ACS-2         |
| 21  | JUL   | 2005 | 06   | 23  | 001    | MC46        | Chryste | M1869c     | 01  | ACS-2         |
| 21  | JUL   | 2005 | 06   | 48  | 001    | MC46        | Chryste | M1869c     | 01  | ACS-2         |
| 21  | JUL   | 2005 | 07   | 12  | 001    | MC46        | Chryste | M1869c     | 01  | ACS-2         |
| 21  | JUL   | 2005 | 07   | 38  | 001    | MC46        | Chryste | M1869c     | 01  | ACS-2         |
| 21  | JUL   | 2005 | 08   | 02  | 001    | MC46        | Chryste | M1869c     | 01  | ACS-2         |

| Irradiation<br>Constants |         | 40/36(a) |             | 40/36(c) |             | 38/36(a) |             | 38/36(c) |             |
|--------------------------|---------|----------|-------------|----------|-------------|----------|-------------|----------|-------------|
|                          |         |          | %1 $\sigma$ |          | %1 $\sigma$ |          | %1 $\sigma$ |          | %1 $\sigma$ |
| M1869-01                 | 650 °C  | 298.56   | 0.1         | 0.018    | 35          | 0.1885   | 0.16        | 1.7      | 3           |
| M1869-06                 | 700 °C  | 298.56   | 0.1         | 0.018    | 35          | 0.1885   | 0.16        | 1.7      | 3           |
| M1869-07                 | 750 °C  | 298.56   | 0.1         | 0.018    | 35          | 0.1885   | 0.16        | 1.7      | 3           |
| M1869-08                 | 800 °C  | 298.56   | 0.1         | 0.018    | 35          | 0.1885   | 0.16        | 1.7      | 3           |
| M1869-09                 | 900 °C  | 298.56   | 0.1         | 0.018    | 35          | 0.1885   | 0.16        | 1.7      | 3           |
| M1869-10                 | 1000 °C | 298.56   | 0.1         | 0.018    | 35          | 0.1885   | 0.16        | 1.7      | 3           |
| M1869-11                 | 1130 °C | 298.56   | 0.1         | 0.018    | 35          | 0.1885   | 0.16        | 1.7      | 3           |
| M1869-12                 | 1280 °C | 298.56   | 0.1         | 0.018    | 35          | 0.1885   | 0.16        | 1.7      | 3           |
| M1869-13                 | 1430 °C | 298.56   | 0.1         | 0.018    | 35          | 0.1885   | 0.16        | 1.7      | 3           |

| Irradiation<br>Constants | 39/37(ca) |             | 38/37(ca) |             | 36/37(ca) |             | 40/39(k) |             | 38/39(k) |             | 36/38(cl) |             |    |
|--------------------------|-----------|-------------|-----------|-------------|-----------|-------------|----------|-------------|----------|-------------|-----------|-------------|----|
|                          |           | %1 $\sigma$ |           | %1 $\sigma$ |           | %1 $\sigma$ |          | %1 $\sigma$ |          | %1 $\sigma$ |           | %1 $\sigma$ |    |
| M1869-01                 | 650 °C    | 0.00073     | 4         | 0.006       | 90        | 0.000282    | 1        | 0.001       | 3        | 0.012       | 2         | 316         | 10 |
| M1869-06                 | 700 °C    | 0.00073     | 4         | 0.006       | 90        | 0.000282    | 1        | 0.001       | 3        | 0.012       | 2         | 316         | 10 |
| M1869-07                 | 750 °C    | 0.00073     | 4         | 0.006       | 90        | 0.000282    | 1        | 0.001       | 3        | 0.012       | 2         | 316         | 10 |
| M1869-08                 | 800 °C    | 0.00073     | 4         | 0.006       | 90        | 0.000282    | 1        | 0.001       | 3        | 0.012       | 2         | 316         | 10 |
| M1869-09                 | 900 °C    | 0.00073     | 4         | 0.006       | 90        | 0.000282    | 1        | 0.001       | 3        | 0.012       | 2         | 316         | 10 |
| M1869-10                 | 1000 °C   | 0.00073     | 4         | 0.006       | 90        | 0.000282    | 1        | 0.001       | 3        | 0.012       | 2         | 316         | 10 |
| M1869-11                 | 1130 °C   | 0.00073     | 4         | 0.006       | 90        | 0.000282    | 1        | 0.001       | 3        | 0.012       | 2         | 316         | 10 |
| M1869-12                 | 1280 °C   | 0.00073     | 4         | 0.006       | 90        | 0.000282    | 1        | 0.001       | 3        | 0.012       | 2         | 316         | 10 |
| M1869-13                 | 1430 °C   | 0.00073     | 4         | 0.006       | 90        | 0.000282    | 1        | 0.001       | 3        | 0.012       | 2         | 316         | 10 |

| <b>Irradiation<br/>Constants</b> |         | K/Ca | %1 $\sigma$ | K/Cl | %1 $\sigma$ | Ca/Cl | %1 $\sigma$ |
|----------------------------------|---------|------|-------------|------|-------------|-------|-------------|
| M1869-01                         | 650 °C  | 85   | 2           | 0    | 0           | 0     | 0           |
| M1869-06                         | 700 °C  | 85   | 2           | 0    | 0           | 0     | 0           |
| M1869-07                         | 750 °C  | 85   | 2           | 0    | 0           | 0     | 0           |
| M1869-08                         | 800 °C  | 85   | 2           | 0    | 0           | 0     | 0           |
| M1869-09                         | 900 °C  | 85   | 2           | 0    | 0           | 0     | 0           |
| M1869-10                         | 1000 °C | 85   | 2           | 0    | 0           | 0     | 0           |
| M1869-11                         | 1130 °C | 85   | 2           | 0    | 0           | 0     | 0           |
| M1869-12                         | 1280 °C | 85   | 2           | 0    | 0           | 0     | 0           |
| M1869-13                         | 1430 °C | 85   | 2           | 0    | 0           | 0     | 0           |



**M1869C.AGE >>> ALE-7 >>> CHRYSTELE PROJECT**

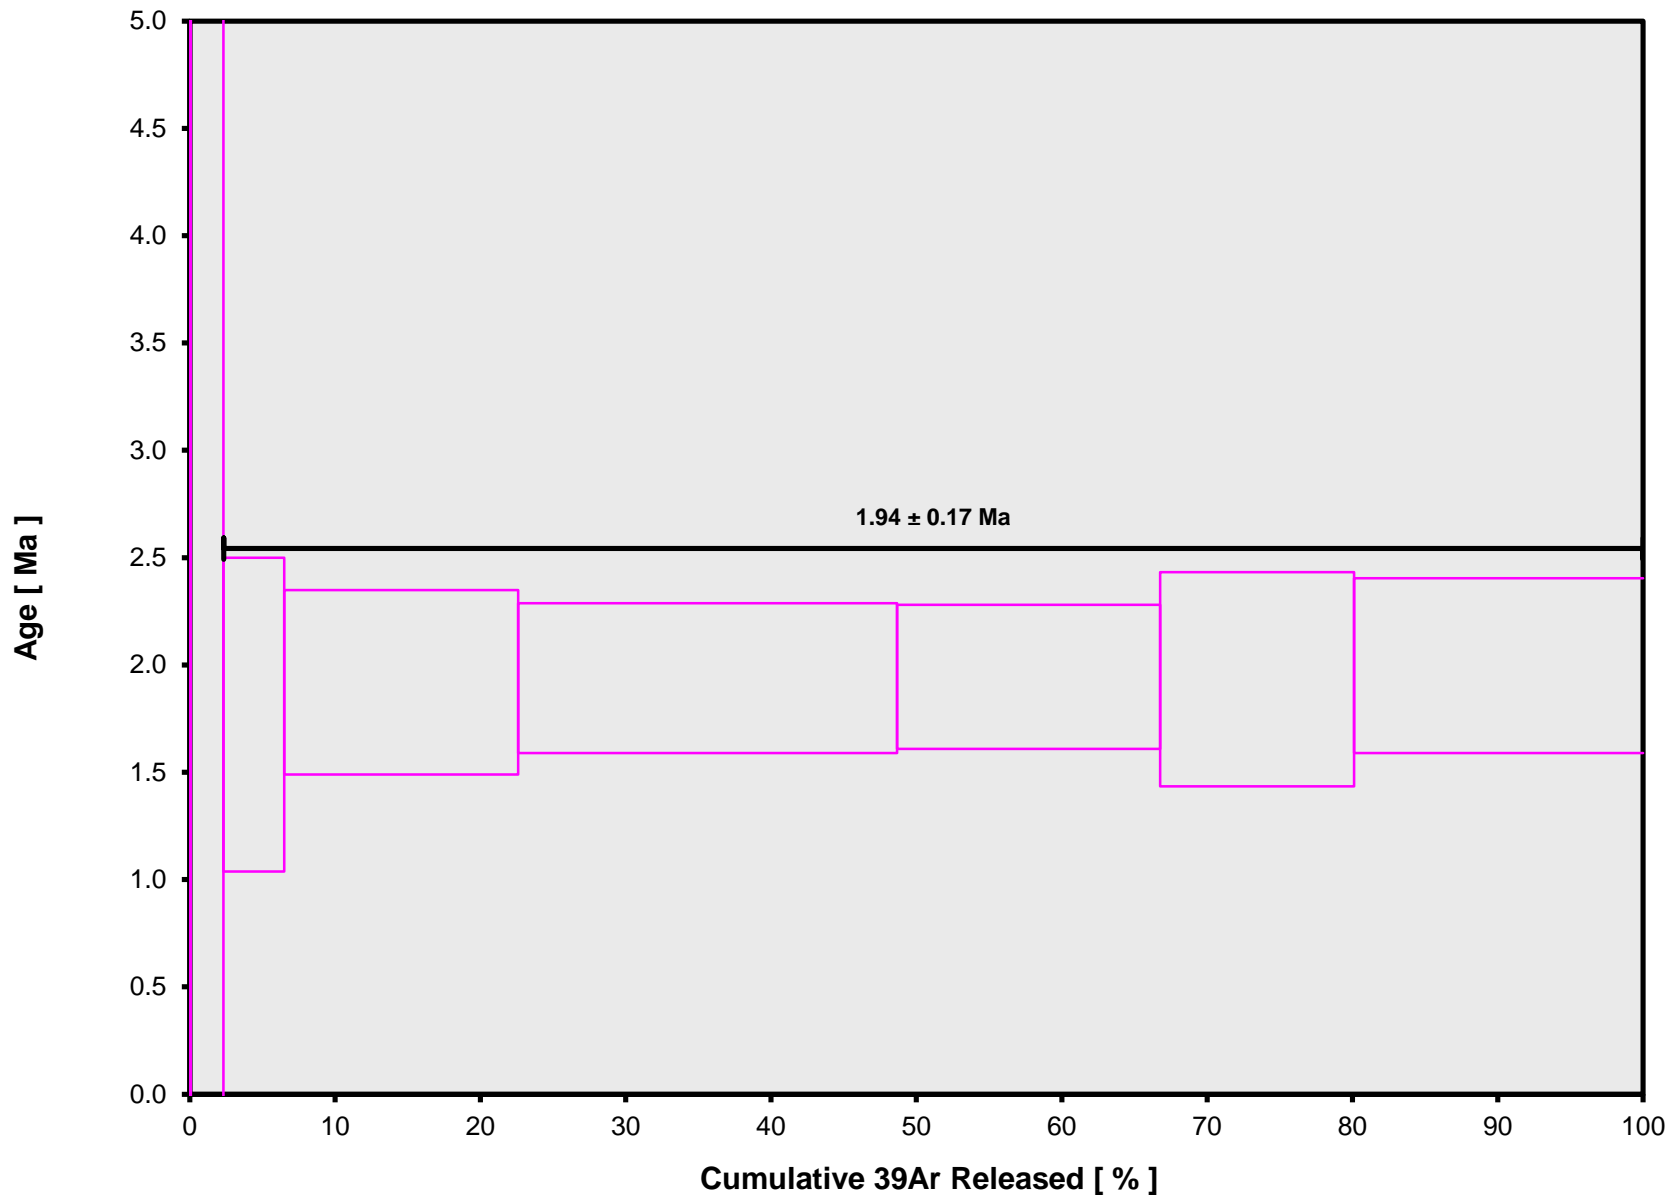

**Ar-Ages in Ma**

**WEIGHTED PLATEAU**

**1.94 ± 0.17**

**TOTAL FUSION**

**1.95 ± 0.19**

**NORMAL ISOCHRON**

**2.03 ± 0.57**

**INVERSE ISOCHRON**

**2.02 ± 0.29**

**MSWD**

**0.06**

**Sample Info**

**Plagioclases**

**Guadeloupe**

**Chrystèle VERATI**

**IRR = MC46**

**J = 0.00027562 ±**

**0.00000138**

**M1869C.AGE >>> ALE-7 >>> CHRYSTELE PROJECT**

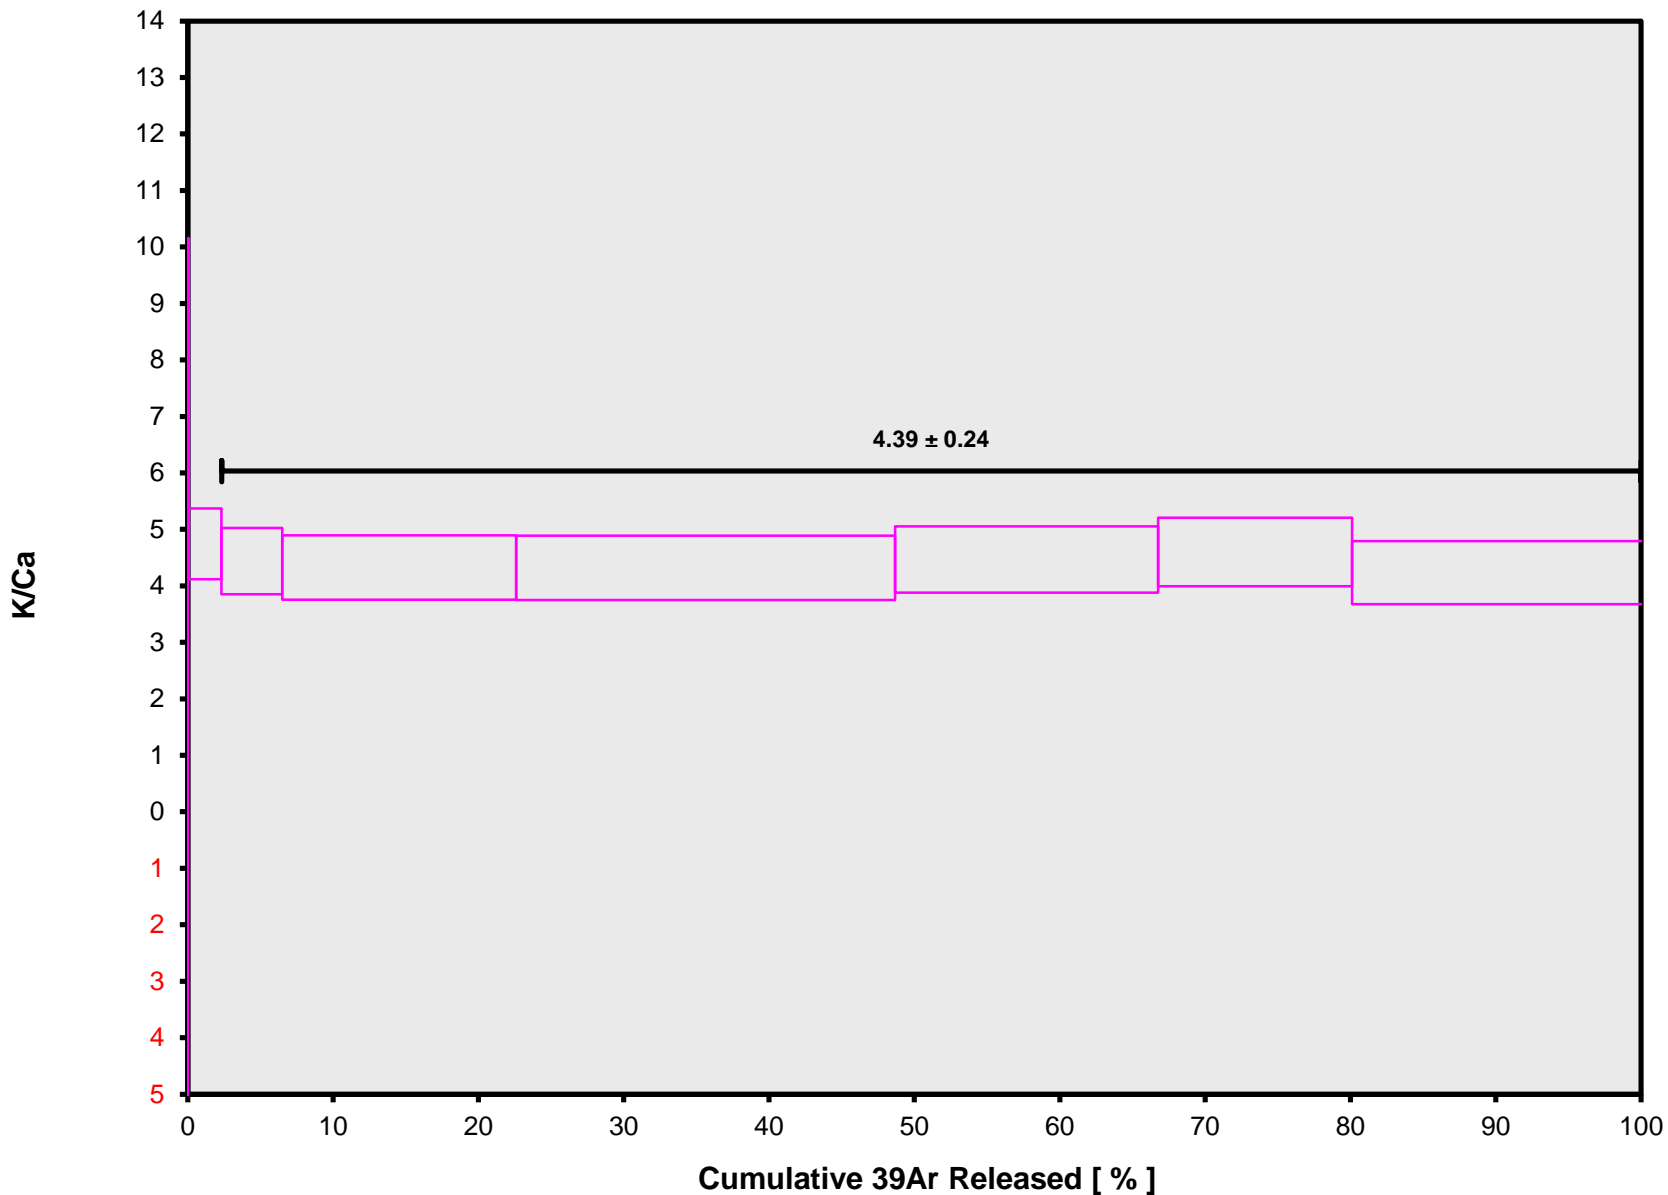

**Ar-Ages in Ma**

**WEIGHTED PLATEAU**  
**1.94 ± 0.17**  
**TOTAL FUSION**  
**1.95 ± 0.19**  
**NORMAL ISOCHRON**  
**2.03 ± 0.57**  
**INVERSE ISOCHRON**  
**2.02 ± 0.29**

**Sample Info**

**Plagioclases**  
**Guadeloupe**  
**Chrystèle VERATI**

**IRR = MC46**  
**J = 0.00027562 ±**  
**0.00000138**

**M1869C.AGE >>> ALE-7 >>> CHRYSTELE PROJECT**

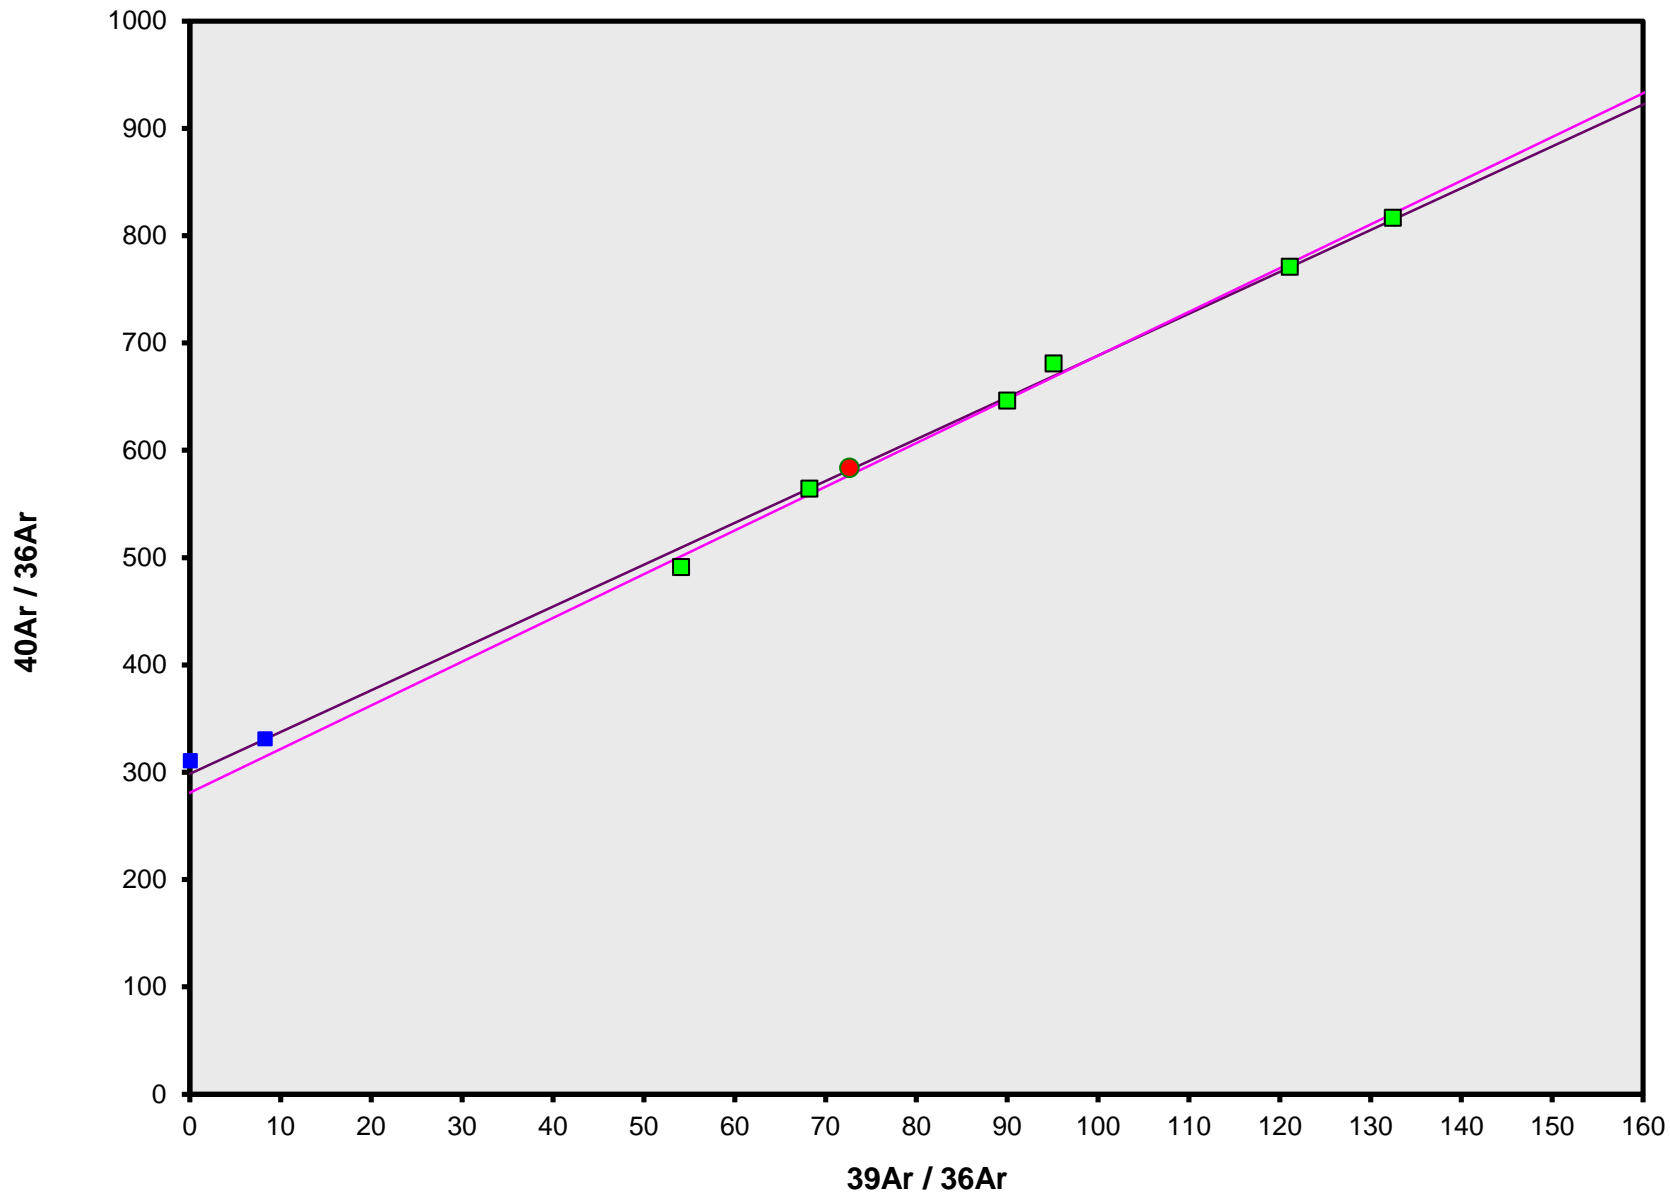

**Ar-Ages in Ma**

**WEIGHTED PLATEAU**

$1.94 \pm 0.17$

**TOTAL FUSION**

$1.95 \pm 0.19$

**NORMAL ISOCHRON**

$2.03 \pm 0.57$

**INVERSE ISOCHRON**

$2.02 \pm 0.29$

**MSWD**

0.06

**40AR/36AR INTERCEPT**

$280.8 \pm 107.0$

**Sample Info**

**Plagioclases**

**Guadeloupe**

**Chrystèle VERATI**

**IRR = MC46**

**J =  $0.00027562 \pm$**

**$0.00000138$**

**M1869C.AGE >>> ALE-7 >>> CHRYSTELE PROJECT**

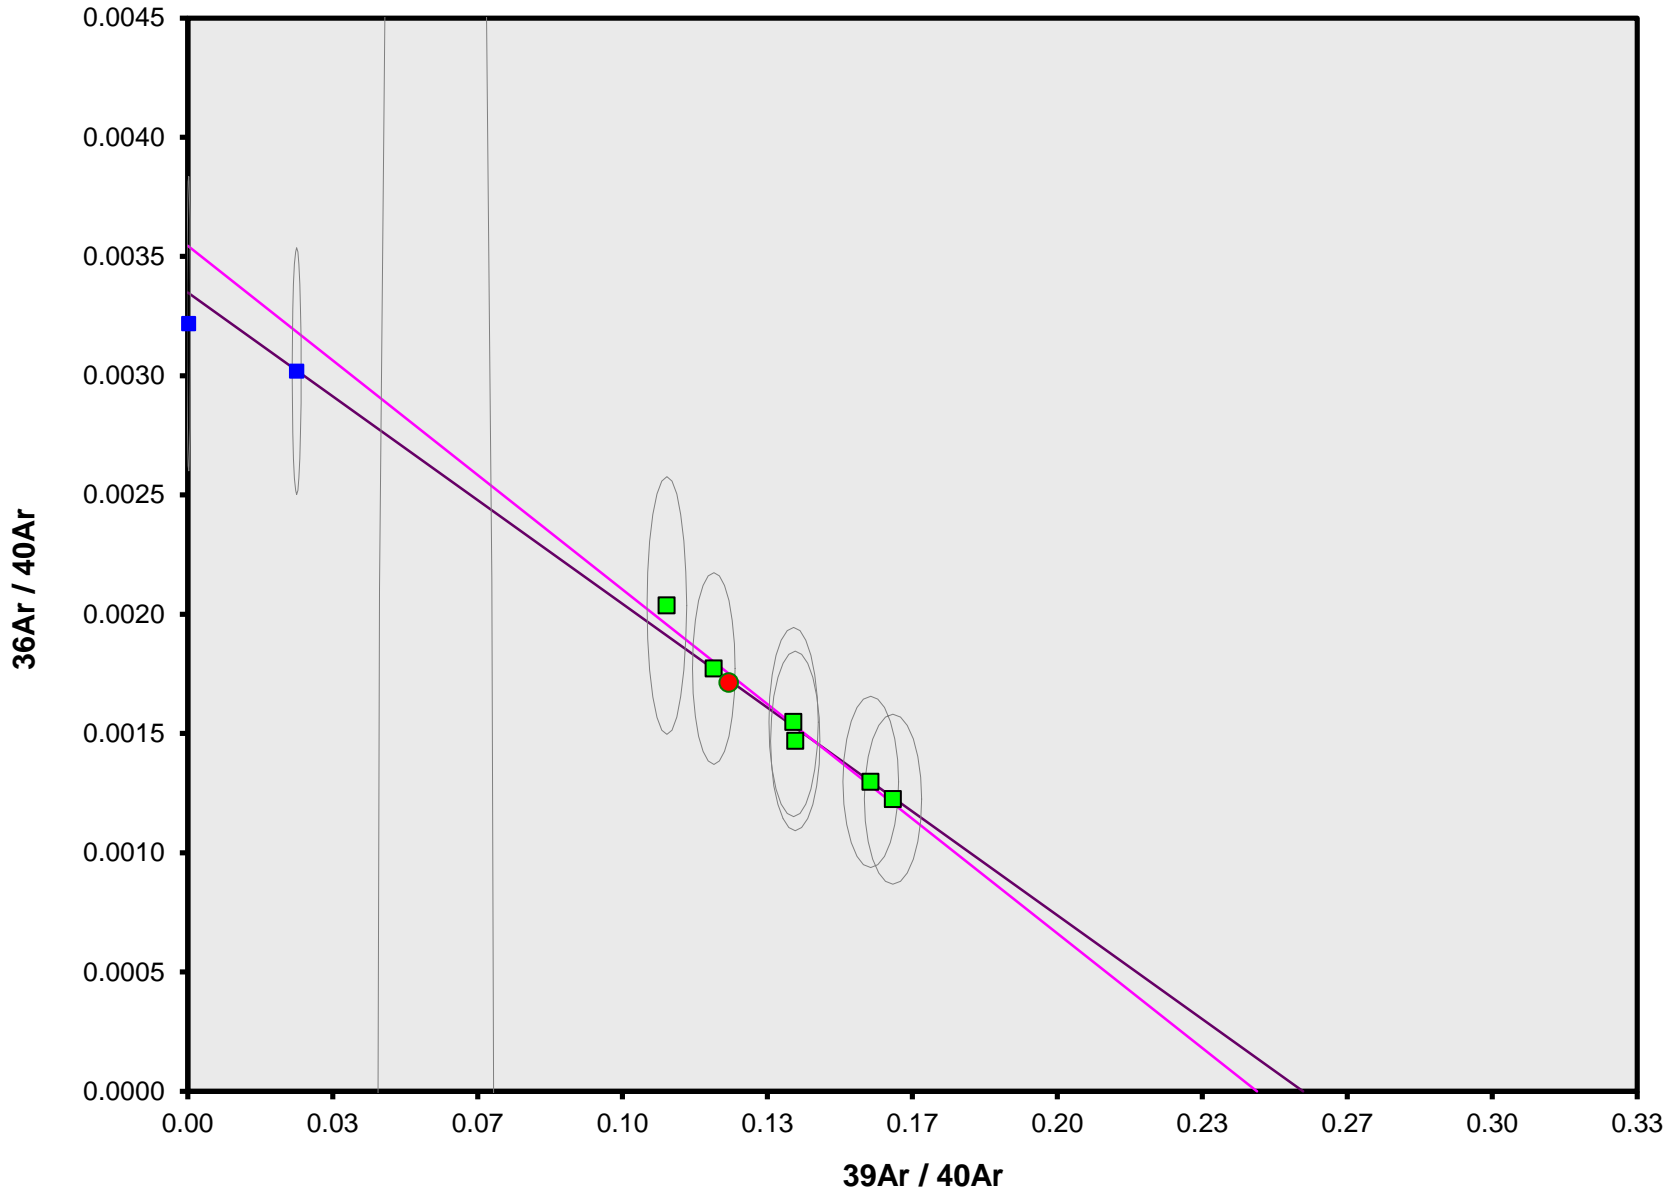

**Ar-Ages in Ma**

**WEIGHTED PLATEAU**

$1.94 \pm 0.17$

**TOTAL FUSION**

$1.95 \pm 0.19$

**NORMAL ISOCHRON**

$2.03 \pm 0.57$

**INVERSE ISOCHRON**

$2.02 \pm 0.29$

**MSWD**

0.06

**40AR/36AR INTERCEPT**

$282.1 \pm 54.8$

**Sample Info**

Plagioclases

Guadeloupe

Chrystèle VERATI

IRR = MC46

J =  $0.00027562 \pm$

$0.00000138$
