# Supplementary material
Source: publisher figshare collection journal article supplement (https://geolsoc.figshare.com/articles/dataset/_/3453656)
Supplement: Supplementary file 3 [file 1]

| Incremental Heating |         | 36Ar(a)  | 37Ar(ca) | 38Ar(cl) | 39Ar(k)  | 40Ar(r)  | Age ± 2σ (Ma)   | 40Ar(r) (%) |
|---------------------|---------|----------|----------|----------|----------|----------|-----------------|-------------|
| 1B15835D            | 670 °C  | 0.000001 | 0.078288 | 0.000010 | 0.001470 | 0.010633 | 9.19 ± 5.10     | 102.74      |
| 1B15836D            | 730 °C  | 0.000014 | 0.177702 | 0.000001 | 0.003337 | 0.024667 | 9.39 ± 2.08     | 85.42       |
| 1B15837D            | 800 °C  | 0.000016 | 0.377023 | 0.000000 | 0.007333 | 0.056934 | 9.87 ± 1.31     | 92.11       |
| 1B15838D            | 870 °C  | 0.000026 | 0.655841 | 0.000000 | 0.012548 | 0.090949 | 9.21 ± 0.85     | 92.23       |
| 1B15839D            | 950 °C  | 0.000115 | 0.869587 | 0.000000 | 0.016984 | 0.112181 | 8.40 ± 0.75     | 76.57       |
| 1B15840D            | 1020 °C | 0.000357 | 0.569216 | 0.000000 | 0.011923 | 0.070506 | 7.52 ± 0.96     | 39.81       |
| 1B15841D            | 1080 °C | 0.000080 | 0.240061 | 0.000000 | 0.005459 | 0.034507 | 8.04 ± 1.76     | 59.00       |
| 1B15842D            | 1130 °C | 0.000060 | 0.172970 | 0.000000 | 0.003553 | 0.023475 | 8.40 ± 2.16     | 56.81       |
| 1B15843D            | 1180 °C | 0.000086 | 0.190620 | 0.000008 | 0.003911 | 0.026043 | 8.46 ± 3.94     | 50.46       |
| 1B15844D            | 1230 °C | 0.000087 | 0.211337 | 0.000000 | 0.004799 | 0.033647 | 8.91 ± 3.36     | 56.36       |
| 1B15845D            | 1280 °C | 0.000126 | 0.256507 | 0.000000 | 0.005179 | 0.031705 | 7.78 ± 3.12     | 45.68       |
| 1B15846D            | 1350 °C | 0.001235 | 0.676045 | 0.000027 | 0.011957 | 0.074139 | 7.88 ± 1.97     | 16.74       |
| 1B15847D            | 1420 °C | 0.001875 | 0.033905 | 0.000000 | 0.000576 | 0.013115 | 28.79 ± 48.60   | 2.29        |
| 1B15848D            | 1500 °C | 0.000729 | 0.003091 | 0.000000 | 0.000045 | 0.001209 | 34.10 ± 442.56  | 0.55        |
| 1B15849D            | 1550 °C | 0.001513 | 0.003900 | 0.000000 | 0.000054 | 0.015206 | 403.90 ± 611.26 | 3.48        |
| Σ                   |         | 0.006318 | 4.516093 | 0.000046 | 0.089125 | 0.588505 |                 |             |

**Information on Analysis**

Sample = EY113.4  
 Material = Groundmass  
 Location = Furnace  
 Analyst = Eric Thorn  
 Project = ANTILLES-NICE  
 Mass Discrimination Law = POW  
 Irradiation = 18t2h  
 J = 0.00070700 ± 0.00000502  
 GA1550 = 99.769 ± 0.110 Ma

| Results                                | 40(r)/39(k) ± 2σ           | Age ± 2σ (Ma)              | MSWD   |
|----------------------------------------|----------------------------|----------------------------|--------|
| <b>Age Plateau</b>                     | 6.7397 ± 0.3276<br>± 4.86% | 8.57 ± 0.43<br>± 5.05%     | 1.06   |
| <b>MSWD = 1.06, probability = 0.39</b> |                            | Full External Error ± 0.44 | 2.16   |
|                                        |                            | Analytical Error ± 0.42    | 1.0273 |
| <b>Total Fusion Age</b>                | 6.6032 ± 0.5484<br>± 8.31% | 8.39 ± 0.71<br>± 8.41%     |        |
|                                        |                            | Full External Error ± 0.71 |        |
|                                        |                            | Analytical Error ± 0.70    |        |

---

| $^{39}\text{Ar}(k)$<br>(%) | K/Ca $\pm 2\sigma$  |
|----------------------------|---------------------|
| 1.65                       | 0.0081 $\pm$ 0.0009 |
| 3.74                       | 0.0081 $\pm$ 0.0008 |
| 8.23                       | 0.0084 $\pm$ 0.0008 |
| 14.08                      | 0.0082 $\pm$ 0.0008 |
| 19.06                      | 0.0084 $\pm$ 0.0008 |
| 13.38                      | 0.0090 $\pm$ 0.0009 |
| 6.12                       | 0.0098 $\pm$ 0.0009 |
| 3.99                       | 0.0088 $\pm$ 0.0009 |
| 4.39                       | 0.0088 $\pm$ 0.0009 |
| 5.38                       | 0.0098 $\pm$ 0.0010 |
| 5.81                       | 0.0087 $\pm$ 0.0009 |
| 13.42                      | 0.0076 $\pm$ 0.0007 |
| 0.65                       | 0.0073 $\pm$ 0.0011 |
| 0.05                       | 0.0062 $\pm$ 0.0082 |
| 0.06                       | 0.0059 $\pm$ 0.0065 |

---

---

| $^{39}\text{Ar}(k)$<br>(%,n)                                               | K/Ca $\pm 2\sigma$  |
|----------------------------------------------------------------------------|---------------------|
| 99.94<br>14                                                                | 0.0085 $\pm$ 0.0004 |
| <a href="#">Statistical T Ratio</a><br><a href="#">Error Magnification</a> |                     |
| 15                                                                         | 0.0085 $\pm$ 0.0003 |

---

| Inverse Isochron |         |  | 39(k)/40(a+r) ± 2σ  | 36(a)/40(a+r) ± 2σ  | r.i.   |
|------------------|---------|--|---------------------|---------------------|--------|
| 1B15835D         | 670 °C  |  | 0.142035 ± 0.017603 | 0.000092 ± 0.001870 | 0.0058 |
| 1B15836D         | 730 °C  |  | 0.115554 ± 0.005784 | 0.000488 ± 0.000614 | 0.0318 |
| 1B15837D         | 800 °C  |  | 0.118632 ± 0.003434 | 0.000264 ± 0.000399 | 0.0105 |
| 1B15838D         | 870 °C  |  | 0.127258 ± 0.002375 | 0.000260 ± 0.000281 | 0.0087 |
| 1B15839D         | 950 °C  |  | 0.115930 ± 0.001738 | 0.000785 ± 0.000227 | 0.0178 |
| 1B15840D         | 1020 °C |  | 0.067329 ± 0.001194 | 0.002016 ± 0.000169 | 0.0365 |
| 1B15841D         | 1080 °C |  | 0.093342 ± 0.002550 | 0.001373 ± 0.000426 | 0.0570 |
| 1B15842D         | 1130 °C |  | 0.085974 ± 0.003129 | 0.001447 ± 0.000480 | 0.0793 |
| 1B15843D         | 1180 °C |  | 0.075765 ± 0.009986 | 0.001659 ± 0.000690 | 0.3095 |
| 1B15844D         | 1230 °C |  | 0.080389 ± 0.009179 | 0.001461 ± 0.000627 | 0.2588 |
| 1B15845D         | 1280 °C |  | 0.074626 ± 0.007399 | 0.001819 ± 0.000550 | 0.3131 |
| 1B15846D         | 1350 °C |  | 0.027002 ± 0.000599 | 0.002789 ± 0.000137 | 0.2154 |
| 1B15847D         | 1420 °C |  | 0.001005 ± 0.000069 | 0.003273 ± 0.000130 | 0.0511 |
| 1B15848D         | 1500 °C |  | 0.000205 ± 0.000092 | 0.003331 ± 0.000242 | 0.0291 |
| 1B15849D         | 1550 °C |  | 0.000123 ± 0.000067 | 0.003466 ± 0.000145 | 0.0105 |

| Results          | 40(a)/36(a) ± 2σ                                                    | 40(r)/39(k) ± 2σ           | Age ± 2σ (Ma)                                          | MSWD                                 |
|------------------|---------------------------------------------------------------------|----------------------------|--------------------------------------------------------|--------------------------------------|
| Inverse Isochron | 297.0425 ± 4.5592<br>± 1.53%                                        | 6.7676 ± 0.1810<br>± 2.67% | 8.60 ± 0.26<br>± 3.02%                                 | 1.14                                 |
|                  |                                                                     |                            | Full External Error ± 0.26<br>Analytical Error ± 0.23  |                                      |
| Statistics       | Statistical F ratio<br>Error Magnification<br>Number of Data Points | 1.75<br>1.0657<br>14       | Convergence<br>Number of Iterations<br>Calculated Line | 0.0001608485<br>3<br>Weighted York-2 |

| Relative Abundances |         |   | 36Ar      | %1σ    | 37Ar      | %1σ    | 38Ar      | %1σ    | 39Ar      | %1σ    |
|---------------------|---------|---|-----------|--------|-----------|--------|-----------|--------|-----------|--------|
| 1B15835D            | 670 °C  | 📄 | 0.0000211 | 45.443 | 0.0782877 | 5.301  | 0.0000294 | 31.388 | 0.0015270 | 1.237  |
| 1B15836D            | 730 °C  | 📄 | 0.0000642 | 13.243 | 0.1777020 | 4.834  | 0.0000490 | 18.642 | 0.0034664 | 0.986  |
| 1B15837D            | 800 °C  | 📄 | 0.0001226 | 9.102  | 0.3770229 | 4.813  | 0.0001013 | 10.108 | 0.0076078 | 0.833  |
| 1B15838D            | 870 °C  | 📄 | 0.0002106 | 5.025  | 0.6558413 | 4.715  | 0.0001709 | 4.551  | 0.0130272 | 0.455  |
| 1B15839D            | 950 °C  | 📄 | 0.0003602 | 3.253  | 0.8695871 | 4.698  | 0.0002444 | 5.607  | 0.0176184 | 0.397  |
| 1B15840D            | 1020 °C | 📄 | 0.0005175 | 2.461  | 0.5692157 | 4.709  | 0.0002256 | 5.500  | 0.0123382 | 0.667  |
| 1B15841D            | 1080 °C | 📄 | 0.0001480 | 8.099  | 0.2400611 | 4.770  | 0.0000828 | 15.129 | 0.0056338 | 0.691  |
| 1B15842D            | 1130 °C | 📄 | 0.0001085 | 8.814  | 0.1729697 | 4.914  | 0.0000592 | 16.404 | 0.0036788 | 0.827  |
| 1B15843D            | 1180 °C | 📄 | 0.0001394 | 11.960 | 0.1906200 | 5.189  | 0.0000771 | 10.482 | 0.0040497 | 0.881  |
| 1B15844D            | 1230 °C | 📄 | 0.0001468 | 12.125 | 0.2113368 | 4.886  | 0.0000698 | 19.037 | 0.0049530 | 0.847  |
| 1B15845D            | 1280 °C | 📄 | 0.0001986 | 8.924  | 0.2565074 | 4.859  | 0.0000804 | 12.655 | 0.0053666 | 0.927  |
| 1B15846D            | 1350 °C | 📄 | 0.0014256 | 1.922  | 0.6760451 | 4.704  | 0.0004214 | 3.857  | 0.0124509 | 0.607  |
| 1B15847D            | 1420 °C | 📄 | 0.0018844 | 1.885  | 0.0339051 | 6.708  | 0.0003323 | 3.379  | 0.0006005 | 3.219  |
| 1B15848D            | 1500 °C | 📄 | 0.0007297 | 3.287  | 0.0030911 | 61.859 | 0.0001008 | 10.477 | 0.0000470 | 21.035 |
| 1B15849D            | 1550 °C |   | 0.0015138 | 1.936  | 0.0039001 | 47.841 | 0.0002711 | 5.959  | 0.0000564 | 25.817 |
| Σ                   |         |   | 0.0075912 | 0.958  | 4.5160931 | 1.620  | 0.0023156 | 1.948  | 0.0924217 | 0.203  |

### Information on Analysis and Constants Used in Calculations

Sample = EY113.4  
 Material = Groundmass  
 Location = Furnace  
 Analyst = Eric Thern  
 Project = ANTILLES-NICE  
 Mass Discrimination Law = POW  
 Irradiation = 18t2h  
 J = 0.00070700 ± 0.00000502  
 GA1550 = 99.769 ± 0.110 Ma  
 IGSN = **Undefined**  
 Preferred Age = **Undefined**  
 Classification = **Undefined**  
 Experiment Type = **Undefined**  
 Extraction Method = **Undefined**  
 Heating = 60 sec  
 Isolation = 5.00 min  
 Instrument = MAP215-50  
 Lithology = **Undefined**  
 Lat-Lon = **Undefined - Undefined**

Age Equations = Min et al. (2000)  
 Negative Intensities = Allowed  
 Decay Constant 40K = 5.549 ± 0.009 E-10 1/a  
 Decay Constant 39Ar = 2.940 ± 0.029 E-07 1/h  
 Decay Constant 37Ar = 8.230 ± 0.082 E-04 1/h  
 Decay Constant 36Cl = 2.303 ± 0.046 E-06 1/a  
 Production Ratio 36/38 in Cl = 263.0 ± 13.2  
 Decay Constant 40K(EC,β<sup>+</sup>) = 0.576 ± 0.002 E-10 1/a  
 Decay Constant 40K(β<sup>-</sup>) = 4.974 ± 0.009 E-10 1/a  
 Abundance Ratio 40K/K = 1.1700 ± 0.0100 E-04  
 Atomic Weight K = 39.0983 ± 0.0001 g

### Results

#### Age Plateau

#### Total Fusion Age

Normal Isochron  
**No Convergence**

#### Inverse Isochron

| 40Ar      | %1σ   | Age ± 2σ<br>(Ma) | 40Ar(r)<br>(%) | 39Ar(k)<br>(%) | K/Ca ± 2σ       |
|-----------|-------|------------------|----------------|----------------|-----------------|
| 0.0103497 | 6.043 | 9.19 ± 5.10      | 102.74         | 1.65           | 0.0081 ± 0.0009 |
| 0.0288776 | 2.235 | 9.39 ± 2.08      | 85.42          | 3.74           | 0.0081 ± 0.0008 |
| 0.0618142 | 1.070 | 9.87 ± 1.31      | 92.11          | 8.23           | 0.0084 ± 0.0008 |
| 0.0986148 | 0.662 | 9.21 ± 0.85      | 92.23          | 14.08          | 0.0082 ± 0.0008 |
| 0.1465106 | 0.439 | 8.40 ± 0.75      | 76.57          | 19.06          | 0.0084 ± 0.0008 |
| 0.1770903 | 0.368 | 7.52 ± 0.96      | 39.81          | 13.38          | 0.0090 ± 0.0009 |
| 0.0584827 | 1.099 | 8.04 ± 1.76      | 59.00          | 6.12           | 0.0098 ± 0.0009 |
| 0.0413231 | 1.547 | 8.40 ± 2.16      | 56.81          | 3.99           | 0.0088 ± 0.0009 |
| 0.0516168 | 6.512 | 8.46 ± 3.94      | 50.46          | 4.39           | 0.0088 ± 0.0009 |
| 0.0596967 | 5.628 | 8.91 ± 3.36      | 56.36          | 5.38           | 0.0098 ± 0.0010 |
| 0.0694069 | 4.844 | 7.78 ± 3.12      | 45.68          | 5.81           | 0.0087 ± 0.0009 |
| 0.4428433 | 0.767 | 7.88 ± 1.97      | 16.74          | 13.42          | 0.0076 ± 0.0007 |
| 0.5728770 | 0.592 | 28.79 ± 48.60    | 2.29           | 0.65           | 0.0073 ± 0.0011 |
| 0.2188126 | 1.539 | 34.10 ± 442.56   | 0.55           | 0.05           | 0.0062 ± 0.0082 |
| 0.4364337 | 0.773 | 403.90 ± 611.26  | 3.48           | 0.06           | 0.0059 ± 0.0065 |

2.4747500    0.368

| 40(r)/39(k) ± 2σ           | Age ± 2σ<br>(Ma)       | MSWD   | 39Ar(k)<br>(%,n)    | K/Ca ± 2σ       |
|----------------------------|------------------------|--------|---------------------|-----------------|
| 6.7397 ± 0.3276<br>± 4.86% | 8.57 ± 0.43<br>± 5.05% | 1.06   | 99.94<br>14         | 0.0085 ± 0.0004 |
| Full External Error ± 0.44 |                        | 2.16   | Statistical T Ratio |                 |
| Analytical Error ± 0.42    |                        | 1.0273 | Error Magnification |                 |
| 6.6032 ± 0.5484<br>± 8.31% | 8.39 ± 0.71<br>± 8.41% |        | 15                  | 0.0085 ± 0.0003 |
| Full External Error ± 0.71 |                        |        |                     |                 |
| Analytical Error ± 0.70    |                        |        |                     |                 |
| 7.0645 ± 0.3953<br>± 5.59% | 8.98 ± 0.52<br>± 5.76% | 1.53   | 99.94<br>14         |                 |
| Full External Error ± 0.52 |                        | 1.75   | Statistical F ratio |                 |
| Analytical Error ± 0.50    |                        | 1.2364 | Error Magnification |                 |
| 6.7676 ± 0.1810<br>± 2.67% | 8.60 ± 0.26<br>± 3.02% | 1.14   | 99.94<br>14         |                 |
| Full External Error ± 0.26 |                        | 1.75   | Statistical F ratio |                 |
| Analytical Error ± 0.23    |                        | 1.0657 | Error Magnification |                 |

| Procedure Blanks |         | 36Ar     | 1 $\sigma$ | 37Ar     | 1 $\sigma$ | 38Ar     | 1 $\sigma$ | 39Ar     | 1 $\sigma$ | 40Ar     |
|------------------|---------|----------|------------|----------|------------|----------|------------|----------|------------|----------|
| 1B15835D         | 670 °C  | 0.000066 | 0.000008   | 0.000385 | 0.000013   | 0.000020 | 0.000006   | 0.000014 | 0.000007   | 0.013613 |
| 1B15836D         | 730 °C  | 0.000069 | 0.000008   | 0.000387 | 0.000013   | 0.000020 | 0.000006   | 0.000014 | 0.000007   | 0.013762 |
| 1B15837D         | 800 °C  | 0.000071 | 0.000008   | 0.000390 | 0.000013   | 0.000020 | 0.000006   | 0.000014 | 0.000007   | 0.014043 |
| 1B15838D         | 870 °C  | 0.000068 | 0.000008   | 0.000393 | 0.000013   | 0.000020 | 0.000006   | 0.000014 | 0.000007   | 0.013500 |
| 1B15839D         | 950 °C  | 0.000061 | 0.000008   | 0.000398 | 0.000013   | 0.000020 | 0.000006   | 0.000014 | 0.000007   | 0.012002 |
| 1B15840D         | 1020 °C | 0.000058 | 0.000008   | 0.000402 | 0.000013   | 0.000020 | 0.000006   | 0.000014 | 0.000007   | 0.011306 |
| 1B15841D         | 1080 °C | 0.000066 | 0.000008   | 0.000406 | 0.000013   | 0.000020 | 0.000006   | 0.000014 | 0.000007   | 0.013015 |
| 1B15842D         | 1130 °C | 0.000087 | 0.000008   | 0.000409 | 0.000013   | 0.000020 | 0.000006   | 0.000014 | 0.000007   | 0.017670 |
| 1B15843D         | 1180 °C | 0.000095 | 0.000016   | 0.000405 | 0.000012   | 0.000026 | 0.000006   | 0.000012 | 0.000007   | 0.019014 |
| 1B15844D         | 1230 °C | 0.000099 | 0.000016   | 0.000405 | 0.000012   | 0.000027 | 0.000006   | 0.000012 | 0.000007   | 0.019854 |
| 1B15845D         | 1280 °C | 0.000105 | 0.000016   | 0.000405 | 0.000012   | 0.000028 | 0.000006   | 0.000012 | 0.000007   | 0.021357 |
| 1B15846D         | 1350 °C | 0.000129 | 0.000016   | 0.000405 | 0.000012   | 0.000029 | 0.000006   | 0.000012 | 0.000007   | 0.028822 |
| 1B15847D         | 1420 °C | 0.000199 | 0.000016   | 0.000405 | 0.000012   | 0.000040 | 0.000006   | 0.000012 | 0.000007   | 0.050645 |
| 1B15848D         | 1500 °C | 0.000384 | 0.000016   | 0.000405 | 0.000012   | 0.000080 | 0.000006   | 0.000012 | 0.000007   | 0.108745 |
| 1B15849D         | 1550 °C | 0.000591 | 0.000016   | 0.000405 | 0.000012   | 0.000132 | 0.000006   | 0.000012 | 0.000007   | 0.172705 |

---

1 $\sigma$

---

0.000621  
0.000621  
0.000621  
0.000621  
0.000621  
0.000621  
0.000621  
0.000621  
0.003356  
0.003356  
0.003356  
0.003356  
0.003356  
0.003356  
0.003356  
0.003356

---

| Sample Parameters |         | Sample  | Material   | Location |
|-------------------|---------|---------|------------|----------|
| 1B15835D          | 670 °C  | EY113.4 | Groundmass | Furnace  |
| 1B15836D          | 730 °C  | EY113.4 | Groundmass | Furnace  |
| 1B15837D          | 800 °C  | EY113.4 | Groundmass | Furnace  |
| 1B15838D          | 870 °C  | EY113.4 | Groundmass | Furnace  |
| 1B15839D          | 950 °C  | EY113.4 | Groundmass | Furnace  |
| 1B15840D          | 1020 °C | EY113.4 | Groundmass | Furnace  |
| 1B15841D          | 1080 °C | EY113.4 | Groundmass | Furnace  |
| 1B15842D          | 1130 °C | EY113.4 | Groundmass | Furnace  |
| 1B15843D          | 1180 °C | EY113.4 | Groundmass | Furnace  |
| 1B15844D          | 1230 °C | EY113.4 | Groundmass | Furnace  |
| 1B15845D          | 1280 °C | EY113.4 | Groundmass | Furnace  |
| 1B15846D          | 1350 °C | EY113.4 | Groundmass | Furnace  |
| 1B15847D          | 1420 °C | EY113.4 | Groundmass | Furnace  |
| 1B15848D          | 1500 °C | EY113.4 | Groundmass | Furnace  |
| 1B15849D          | 1550 °C | EY113.4 | Groundmass | Furnace  |



| Analyst    | Temp |
|------------|------|
| Eric Thorn | 670  |
| Eric Thorn | 730  |
| Eric Thorn | 800  |
| Eric Thorn | 870  |
| Eric Thorn | 950  |
| Eric Thorn | 1020 |
| Eric Thorn | 1080 |
| Eric Thorn | 1130 |
| Eric Thorn | 1180 |
| Eric Thorn | 1230 |
| Eric Thorn | 1280 |
| Eric Thorn | 1350 |
| Eric Thorn | 1420 |
| Eric Thorn | 1500 |
| Eric Thorn | 1550 |

| Standard<br>(in Ma) | %1 $\sigma$ | J        | %1 $\sigma$ | MDF      | %1 $\sigma$ | Volume<br>Ratio | Sensitivity<br>(mol/volt) |
|---------------------|-------------|----------|-------------|----------|-------------|-----------------|---------------------------|
| 99.769              | 0.11        | 0.000707 | 0.71        | 1.006626 | 0.31        | 1               | 4.050E-14                 |
| 99.769              | 0.11        | 0.000707 | 0.71        | 1.006626 | 0.31        | 1               | 4.050E-14                 |
| 99.769              | 0.11        | 0.000707 | 0.71        | 1.006626 | 0.31        | 1               | 4.050E-14                 |
| 99.769              | 0.11        | 0.000707 | 0.71        | 1.006626 | 0.31        | 1               | 4.050E-14                 |
| 99.769              | 0.11        | 0.000707 | 0.71        | 1.006626 | 0.31        | 1               | 4.050E-14                 |
| 99.769              | 0.11        | 0.000707 | 0.71        | 1.006626 | 0.31        | 1               | 4.050E-14                 |
| 99.769              | 0.11        | 0.000707 | 0.71        | 1.006626 | 0.31        | 1               | 4.050E-14                 |
| 99.769              | 0.11        | 0.000707 | 0.71        | 1.006626 | 0.31        | 1               | 4.050E-14                 |
| 99.769              | 0.11        | 0.000707 | 0.71        | 1.006626 | 0.31        | 1               | 4.050E-14                 |
| 99.769              | 0.11        | 0.000707 | 0.71        | 1.006626 | 0.31        | 1               | 4.050E-14                 |
| 99.769              | 0.11        | 0.000707 | 0.71        | 1.006626 | 0.31        | 1               | 4.050E-14                 |
| 99.769              | 0.11        | 0.000707 | 0.71        | 1.006626 | 0.31        | 1               | 4.050E-14                 |
| 99.769              | 0.11        | 0.000707 | 0.71        | 1.006626 | 0.31        | 1               | 4.050E-14                 |
| 99.769              | 0.11        | 0.000707 | 0.71        | 1.006626 | 0.31        | 1               | 4.050E-14                 |
| 99.769              | 0.11        | 0.000707 | 0.71        | 1.006626 | 0.31        | 1               | 4.050E-14                 |

Institute of Geophysics and Planetary Physics  
 Scripps Institution of Oceanography, La Jolla, USA

| Day | Month | Year | Hour | Min | Resist | Irradiation | Project       | Experiment  | Nmb | Standard Name |
|-----|-------|------|------|-----|--------|-------------|---------------|-------------|-----|---------------|
| 20  | APR   | 2011 | 20   | 58  | 001    | l8t2h       | Antilles-Nice | verati-plgA | 01  | GA1550        |
| 20  | APR   | 2011 | 21   | 41  | 001    | l8t2h       | Antilles-Nice | verati-plgA | 01  | GA1550        |
| 20  | APR   | 2011 | 22   | 24  | 001    | l8t2h       | Antilles-Nice | verati-plgA | 01  | GA1550        |
| 20  | APR   | 2011 | 23   | 06  | 001    | l8t2h       | Antilles-Nice | verati-plgA | 01  | GA1550        |
| 20  | APR   | 2011 | 23   | 49  | 001    | l8t2h       | Antilles-Nice | verati-plgA | 01  | GA1550        |
| 21  | APR   | 2011 | 00   | 32  | 001    | l8t2h       | Antilles-Nice | verati-plgA | 01  | GA1550        |
| 21  | APR   | 2011 | 01   | 15  | 001    | l8t2h       | Antilles-Nice | verati-plgA | 01  | GA1550        |
| 21  | APR   | 2011 | 01   | 58  | 001    | l8t2h       | Antilles-Nice | verati-plgA | 01  | GA1550        |
| 21  | APR   | 2011 | 02   | 40  | 001    | l8t2h       | Antilles-Nice | verati-plgA | 01  | GA1550        |
| 21  | APR   | 2011 | 03   | 23  | 001    | l8t2h       | Antilles-Nice | verati-plgA | 01  | GA1550        |
| 21  | APR   | 2011 | 04   | 06  | 001    | l8t2h       | Antilles-Nice | verati-plgA | 01  | GA1550        |
| 21  | APR   | 2011 | 04   | 49  | 001    | l8t2h       | Antilles-Nice | verati-plgA | 01  | GA1550        |
| 21  | APR   | 2011 | 05   | 31  | 001    | l8t2h       | Antilles-Nice | verati-plgA | 01  | GA1550        |
| 21  | APR   | 2011 | 06   | 14  | 001    | l8t2h       | Antilles-Nice | verati-plgA | 01  | GA1550        |
| 21  | APR   | 2011 | 06   | 57  | 001    | l8t2h       | Antilles-Nice | verati-plgA | 01  | GA1550        |

| <b>Irradiation Constants</b> |         | <b>40/36(a)</b> | <b>%1<math>\sigma</math></b> | <b>40/36(c)</b> | <b>%1<math>\sigma</math></b> | <b>38/36(a)</b> | <b>%1<math>\sigma</math></b> | <b>38/36(c)</b> | <b>%1<math>\sigma</math></b> |
|------------------------------|---------|-----------------|------------------------------|-----------------|------------------------------|-----------------|------------------------------|-----------------|------------------------------|
| 1B15835D                     | 670 °C  | 298.56          | 0.1                          | 0.018           | 35                           | 0.1869          | 0.1                          | 1.493           | 3                            |
| 1B15836D                     | 730 °C  | 298.56          | 0.1                          | 0.018           | 35                           | 0.1869          | 0.1                          | 1.493           | 3                            |
| 1B15837D                     | 800 °C  | 298.56          | 0.1                          | 0.018           | 35                           | 0.1869          | 0.1                          | 1.493           | 3                            |
| 1B15838D                     | 870 °C  | 298.56          | 0.1                          | 0.018           | 35                           | 0.1869          | 0.1                          | 1.493           | 3                            |
| 1B15839D                     | 950 °C  | 298.56          | 0.1                          | 0.018           | 35                           | 0.1869          | 0.1                          | 1.493           | 3                            |
| 1B15840D                     | 1020 °C | 298.56          | 0.1                          | 0.018           | 35                           | 0.1869          | 0.1                          | 1.493           | 3                            |
| 1B15841D                     | 1080 °C | 298.56          | 0.1                          | 0.018           | 35                           | 0.1869          | 0.1                          | 1.493           | 3                            |
| 1B15842D                     | 1130 °C | 298.56          | 0.1                          | 0.018           | 35                           | 0.1869          | 0.1                          | 1.493           | 3                            |
| 1B15843D                     | 1180 °C | 298.56          | 0.1                          | 0.018           | 35                           | 0.1869          | 0.1                          | 1.493           | 3                            |
| 1B15844D                     | 1230 °C | 298.56          | 0.1                          | 0.018           | 35                           | 0.1869          | 0.1                          | 1.493           | 3                            |
| 1B15845D                     | 1280 °C | 298.56          | 0.1                          | 0.018           | 35                           | 0.1869          | 0.1                          | 1.493           | 3                            |
| 1B15846D                     | 1350 °C | 298.56          | 0.1                          | 0.018           | 35                           | 0.1869          | 0.1                          | 1.493           | 3                            |
| 1B15847D                     | 1420 °C | 298.56          | 0.1                          | 0.018           | 35                           | 0.1869          | 0.1                          | 1.493           | 3                            |
| 1B15848D                     | 1500 °C | 298.56          | 0.1                          | 0.018           | 35                           | 0.1869          | 0.1                          | 1.493           | 3                            |
| 1B15849D                     | 1550 °C | 298.56          | 0.1                          | 0.018           | 35                           | 0.1869          | 0.1                          | 1.493           | 3                            |

| 39/37(ca) | %1 $\sigma$ | 38/37(ca) | %1 $\sigma$ | 36/37(ca) | %1 $\sigma$ | 40/39(k) | %1 $\sigma$ | 38/39(k) | %1 $\sigma$ | 36/38(cl) | %1 $\sigma$ |
|-----------|-------------|-----------|-------------|-----------|-------------|----------|-------------|----------|-------------|-----------|-------------|
| 0.00073   | 11          | 0.0000229 | 10          | 0.000282  | 1           | 0.000676 | 10          | 0.0124   | 32          | 270       | 0           |
| 0.00073   | 11          | 0.0000229 | 10          | 0.000282  | 1           | 0.000676 | 10          | 0.0124   | 32          | 270       | 0           |
| 0.00073   | 11          | 0.0000229 | 10          | 0.000282  | 1           | 0.000676 | 10          | 0.0124   | 32          | 270       | 0           |
| 0.00073   | 11          | 0.0000229 | 10          | 0.000282  | 1           | 0.000676 | 10          | 0.0124   | 32          | 270       | 0           |
| 0.00073   | 11          | 0.0000229 | 10          | 0.000282  | 1           | 0.000676 | 10          | 0.0124   | 32          | 270       | 0           |
| 0.00073   | 11          | 0.0000229 | 10          | 0.000282  | 1           | 0.000676 | 10          | 0.0124   | 32          | 270       | 0           |
| 0.00073   | 11          | 0.0000229 | 10          | 0.000282  | 1           | 0.000676 | 10          | 0.0124   | 32          | 270       | 0           |
| 0.00073   | 11          | 0.0000229 | 10          | 0.000282  | 1           | 0.000676 | 10          | 0.0124   | 32          | 270       | 0           |
| 0.00073   | 11          | 0.0000229 | 10          | 0.000282  | 1           | 0.000676 | 10          | 0.0124   | 32          | 270       | 0           |
| 0.00073   | 11          | 0.0000229 | 10          | 0.000282  | 1           | 0.000676 | 10          | 0.0124   | 32          | 270       | 0           |
| 0.00073   | 11          | 0.0000229 | 10          | 0.000282  | 1           | 0.000676 | 10          | 0.0124   | 32          | 270       | 0           |
| 0.00073   | 11          | 0.0000229 | 10          | 0.000282  | 1           | 0.000676 | 10          | 0.0124   | 32          | 270       | 0           |
| 0.00073   | 11          | 0.0000229 | 10          | 0.000282  | 1           | 0.000676 | 10          | 0.0124   | 32          | 270       | 0           |
| 0.00073   | 11          | 0.0000229 | 10          | 0.000282  | 1           | 0.000676 | 10          | 0.0124   | 32          | 270       | 0           |
| 0.00073   | 11          | 0.0000229 | 10          | 0.000282  | 1           | 0.000676 | 10          | 0.0124   | 32          | 270       | 0           |
| 0.00073   | 11          | 0.0000229 | 10          | 0.000282  | 1           | 0.000676 | 10          | 0.0124   | 32          | 270       | 0           |
| 0.00073   | 11          | 0.0000229 | 10          | 0.000282  | 1           | 0.000676 | 10          | 0.0124   | 32          | 270       | 0           |

| K/Ca | %1 $\sigma$ | K/Cl | %1 $\sigma$ | Ca/Cl | %1 $\sigma$ |
|------|-------------|------|-------------|-------|-------------|
| 0.43 | 0           | 0    | 0           | 0     | 0           |
| 0.43 | 0           | 0    | 0           | 0     | 0           |
| 0.43 | 0           | 0    | 0           | 0     | 0           |
| 0.43 | 0           | 0    | 0           | 0     | 0           |
| 0.43 | 0           | 0    | 0           | 0     | 0           |
| 0.43 | 0           | 0    | 0           | 0     | 0           |
| 0.43 | 0           | 0    | 0           | 0     | 0           |
| 0.43 | 0           | 0    | 0           | 0     | 0           |
| 0.43 | 0           | 0    | 0           | 0     | 0           |
| 0.43 | 0           | 0    | 0           | 0     | 0           |
| 0.43 | 0           | 0    | 0           | 0     | 0           |
| 0.43 | 0           | 0    | 0           | 0     | 0           |
| 0.43 | 0           | 0    | 0           | 0     | 0           |
| 0.43 | 0           | 0    | 0           | 0     | 0           |
| 0.43 | 0           | 0    | 0           | 0     | 0           |
| 0.43 | 0           | 0    | 0           | 0     | 0           |

VERATI-PLGA.AGE >>> EY113.4 >>> ANTILLES-NICE PROJECT

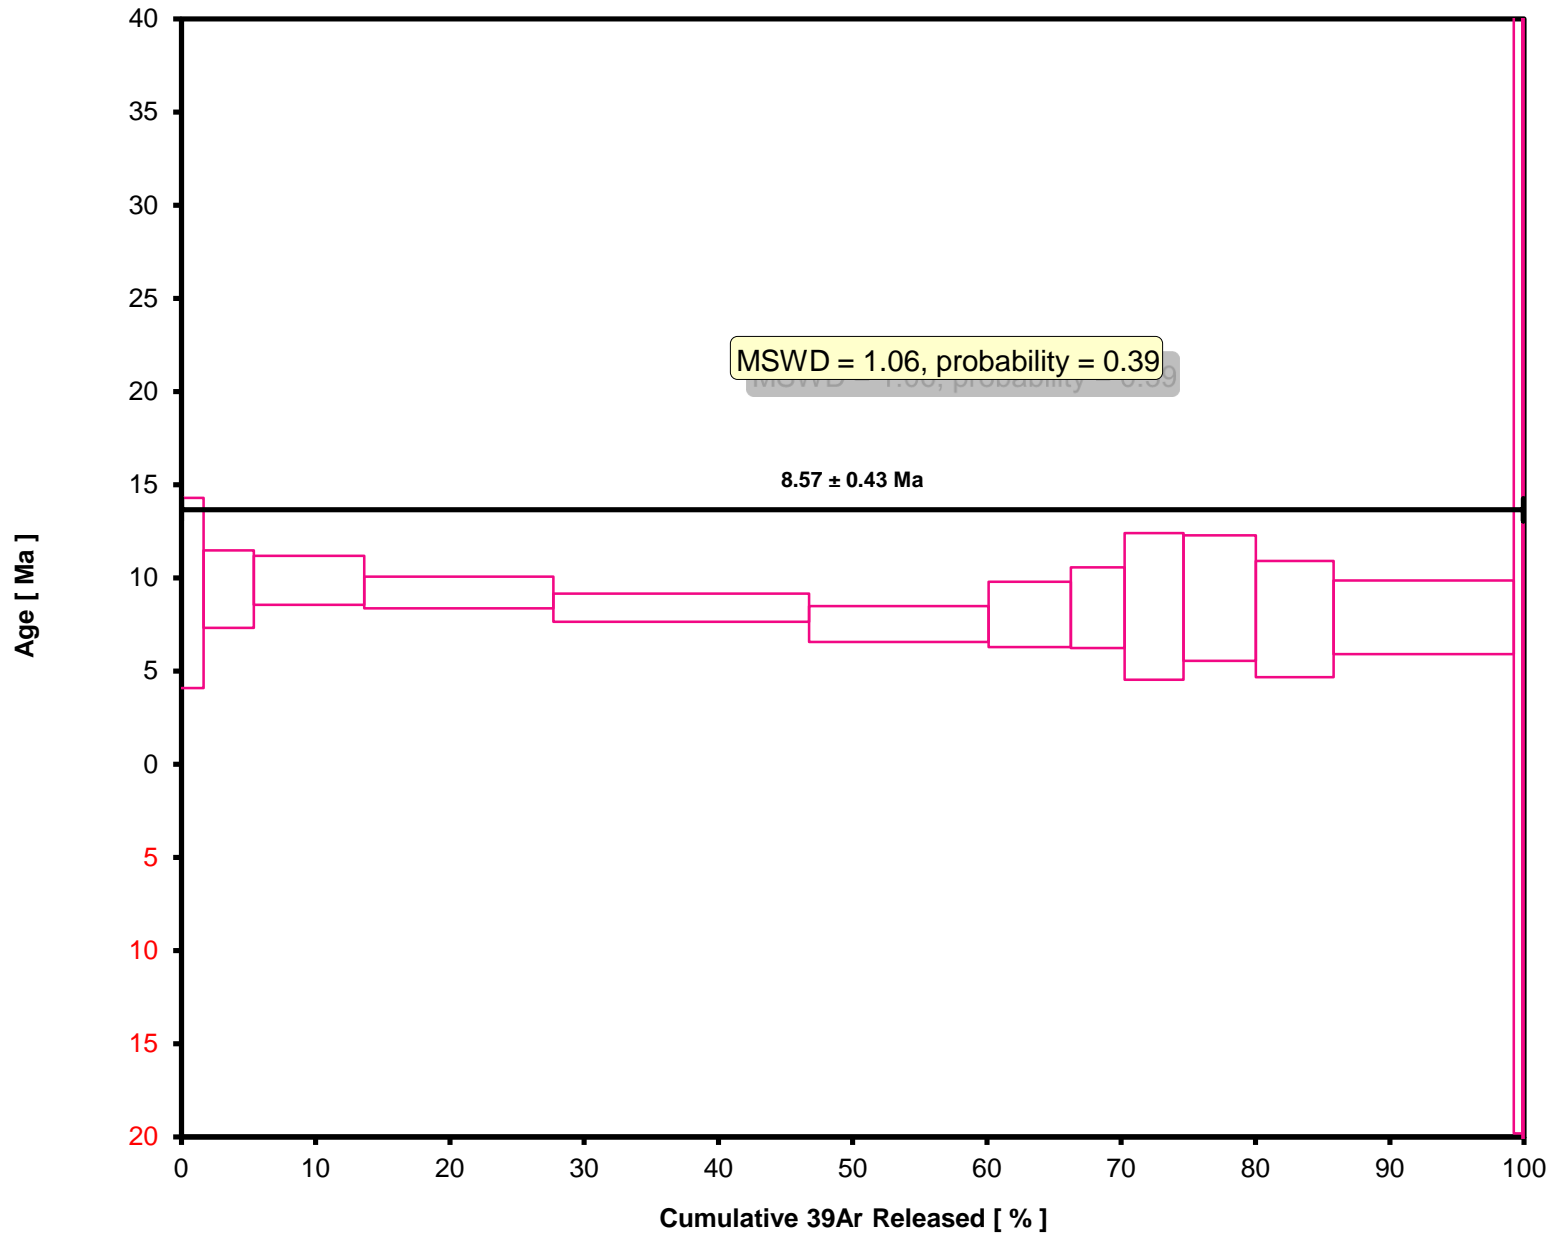

**Ar-Ages in Ma**

**WEIGHTED PLATEAU**

**8.57 ± 0.43**

**TOTAL FUSION**

**8.39 ± 0.71**

**NORMAL ISOCHRON**

**8.98 ± 0.52**

**INVERSE ISOCHRON**

**8.60 ± 0.26**

**MSWD**

**1.06**

**Sample Info**

**Groundmass**

**Furnace**

**Eric Thorn**

**IRR = I8t2h**

**J = 0.00070700 ±**

**0.00000502**

VERATI-PLGA.AGE >>> EY113.4 >>> ANTILLES-NICE PROJECT

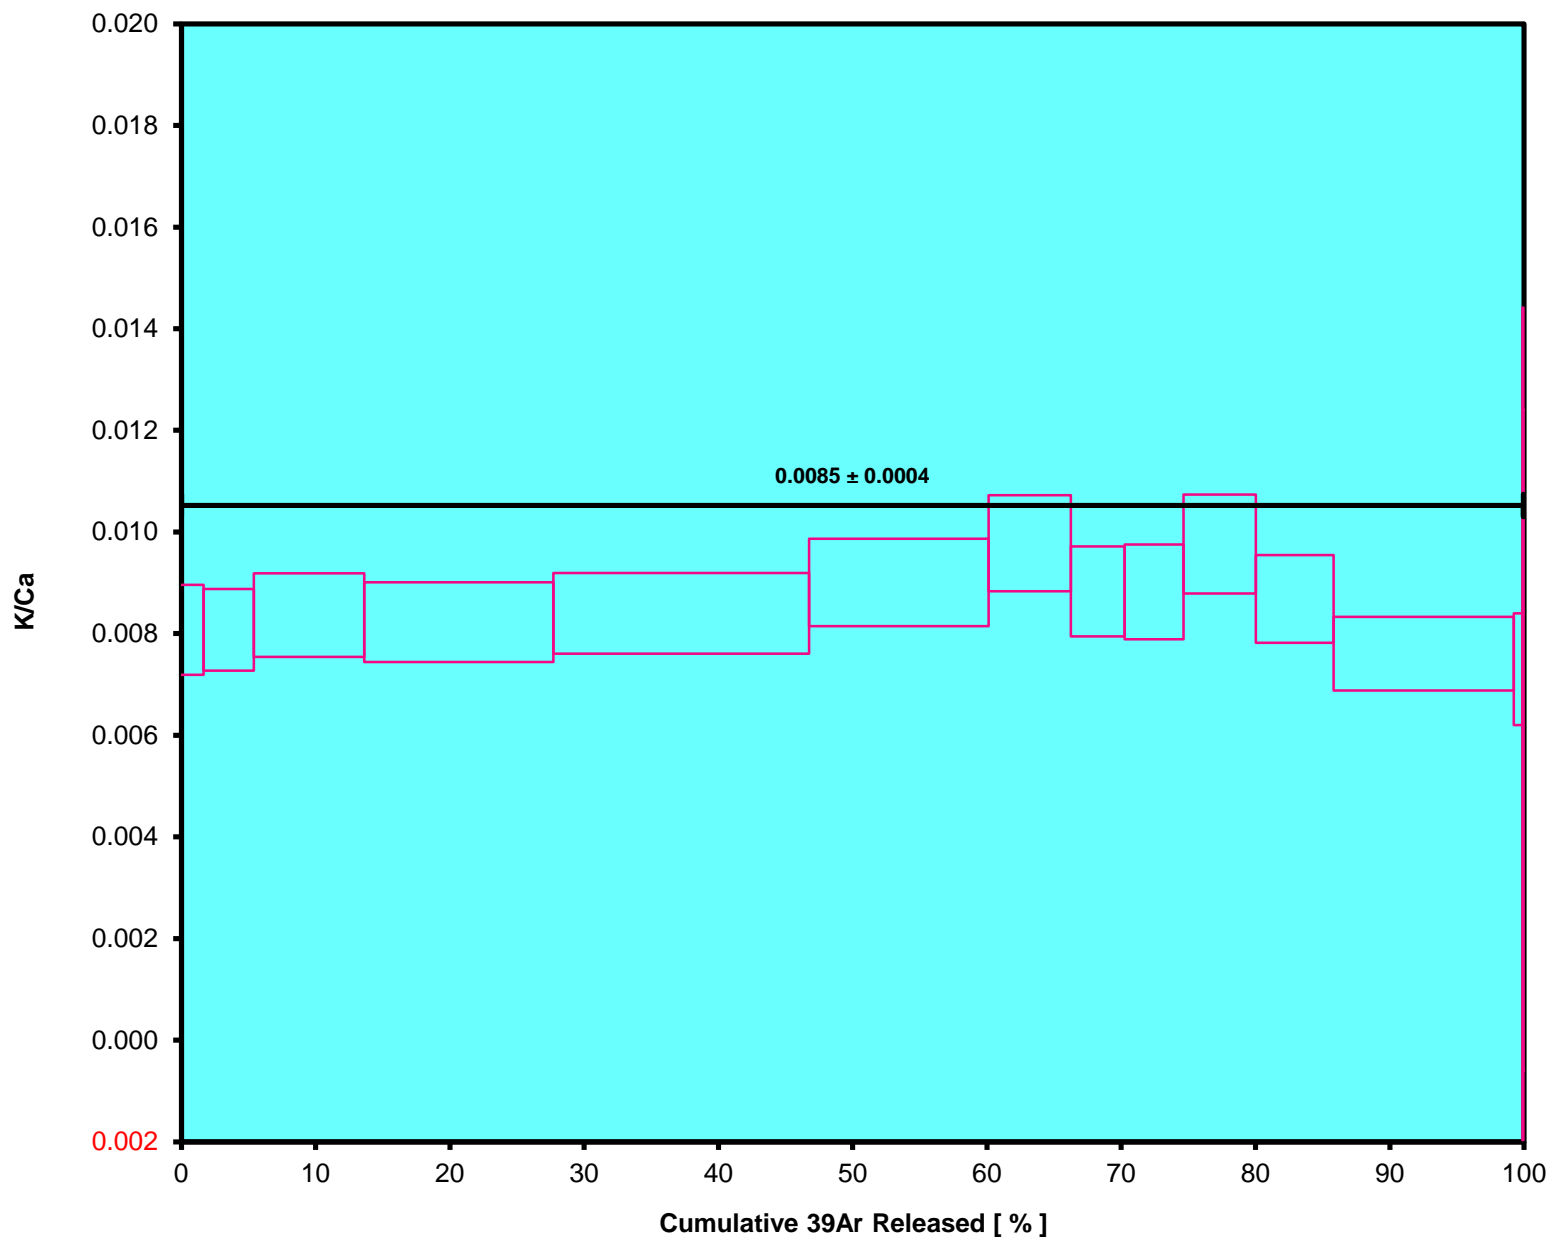

Ar-Ages in Ma

WEIGHTED PLATEAU

8.57 ± 0.43

TOTAL FUSION

8.39 ± 0.71

NORMAL ISOCHRON

8.98 ± 0.52

INVERSE ISOCHRON

8.60 ± 0.26

Sample Info

Groundmass

Furnace

Eric Thorn

IRR = 18t2h

J = 0.00070700 ±

0.00000502



VERATI-PLGA.AGE >>> EY113.4 >>> ANTILLES-NICE PROJECT

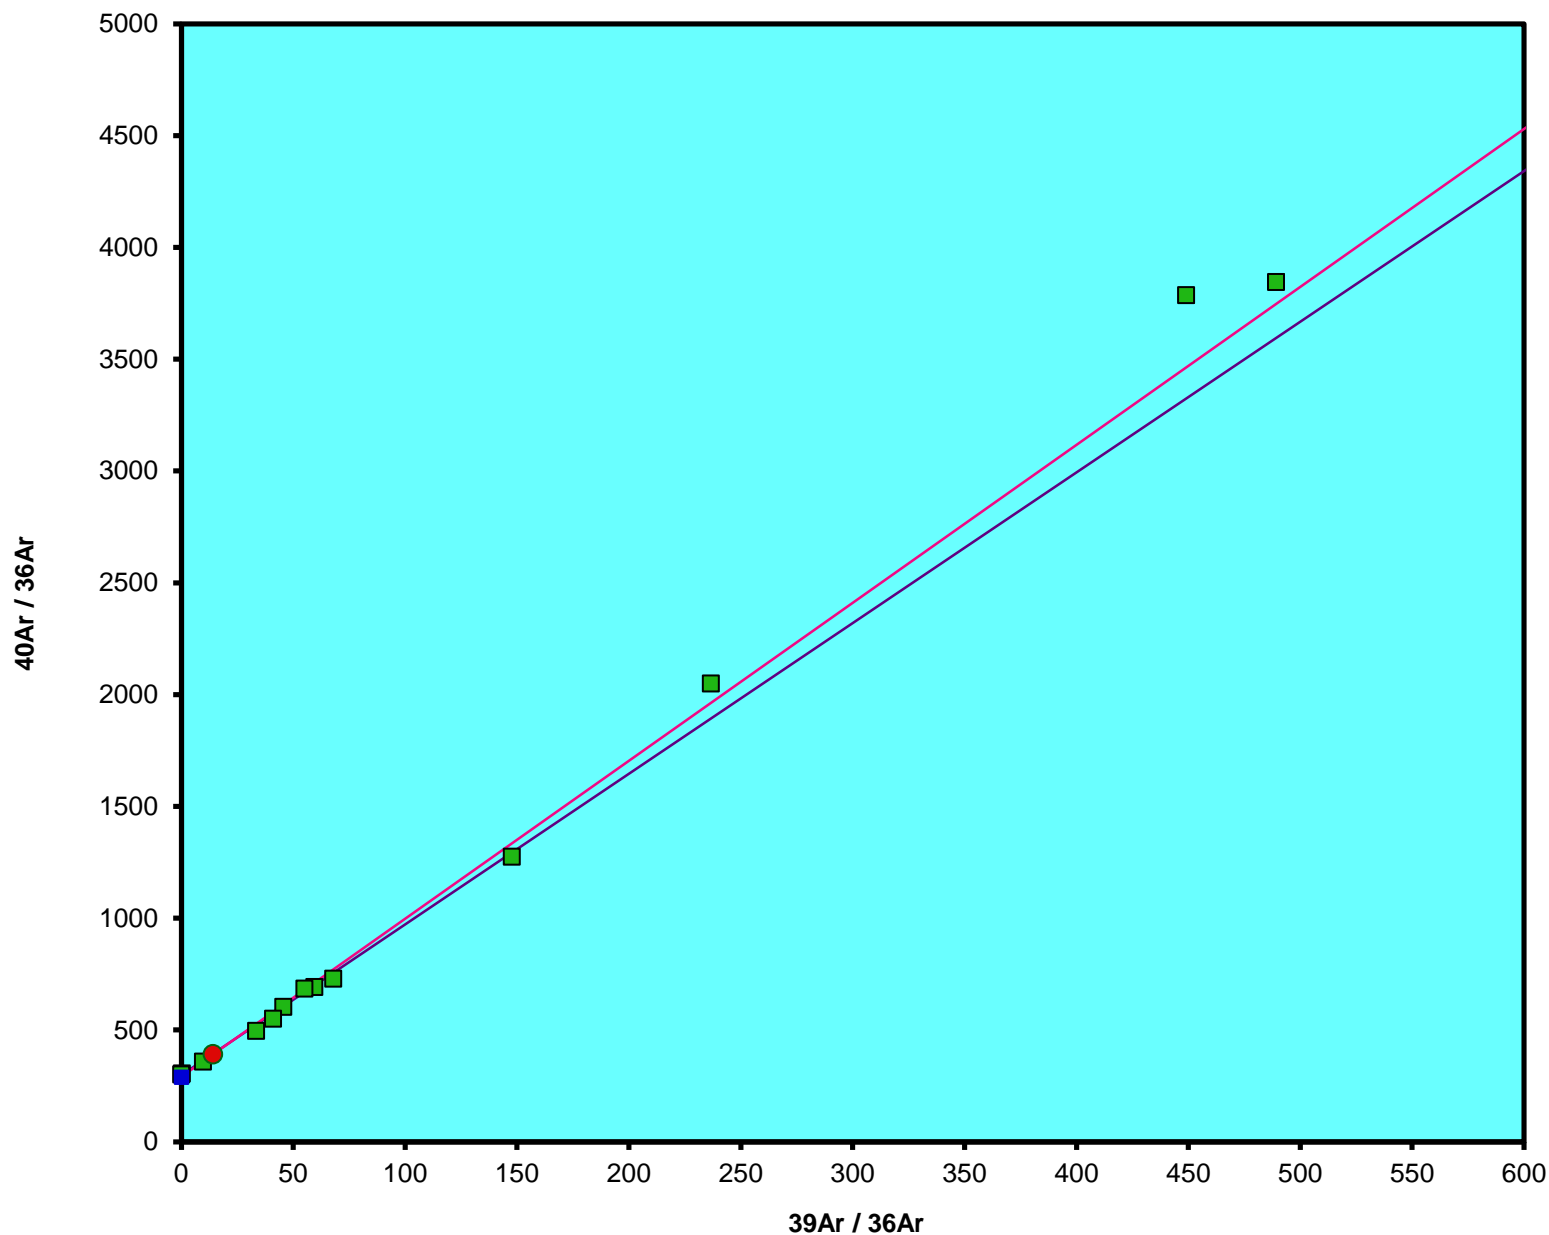

**Ar-Ages in Ma**

**WEIGHTED PLATEAU**

$8.57 \pm 0.43$

**TOTAL FUSION**

$8.39 \pm 0.71$

**NORMAL ISOCHRON**

$8.98 \pm 0.52$

**INVERSE ISOCHRON**

$8.60 \pm 0.26$

**MSWD**

1.53

**40AR/36AR**

**INTERCEPT**

$291.8 \pm 10.6$

**Sample Info**

**Groundmass**

**Furnace**

**Eric Thorn**

**IRR = 18t2h**

**J = 0.00070700 ±**

**0.00000502**

VERATI-PLGA.AGE >>> EY113.4 >>> ANTILLES-NICE PROJECT

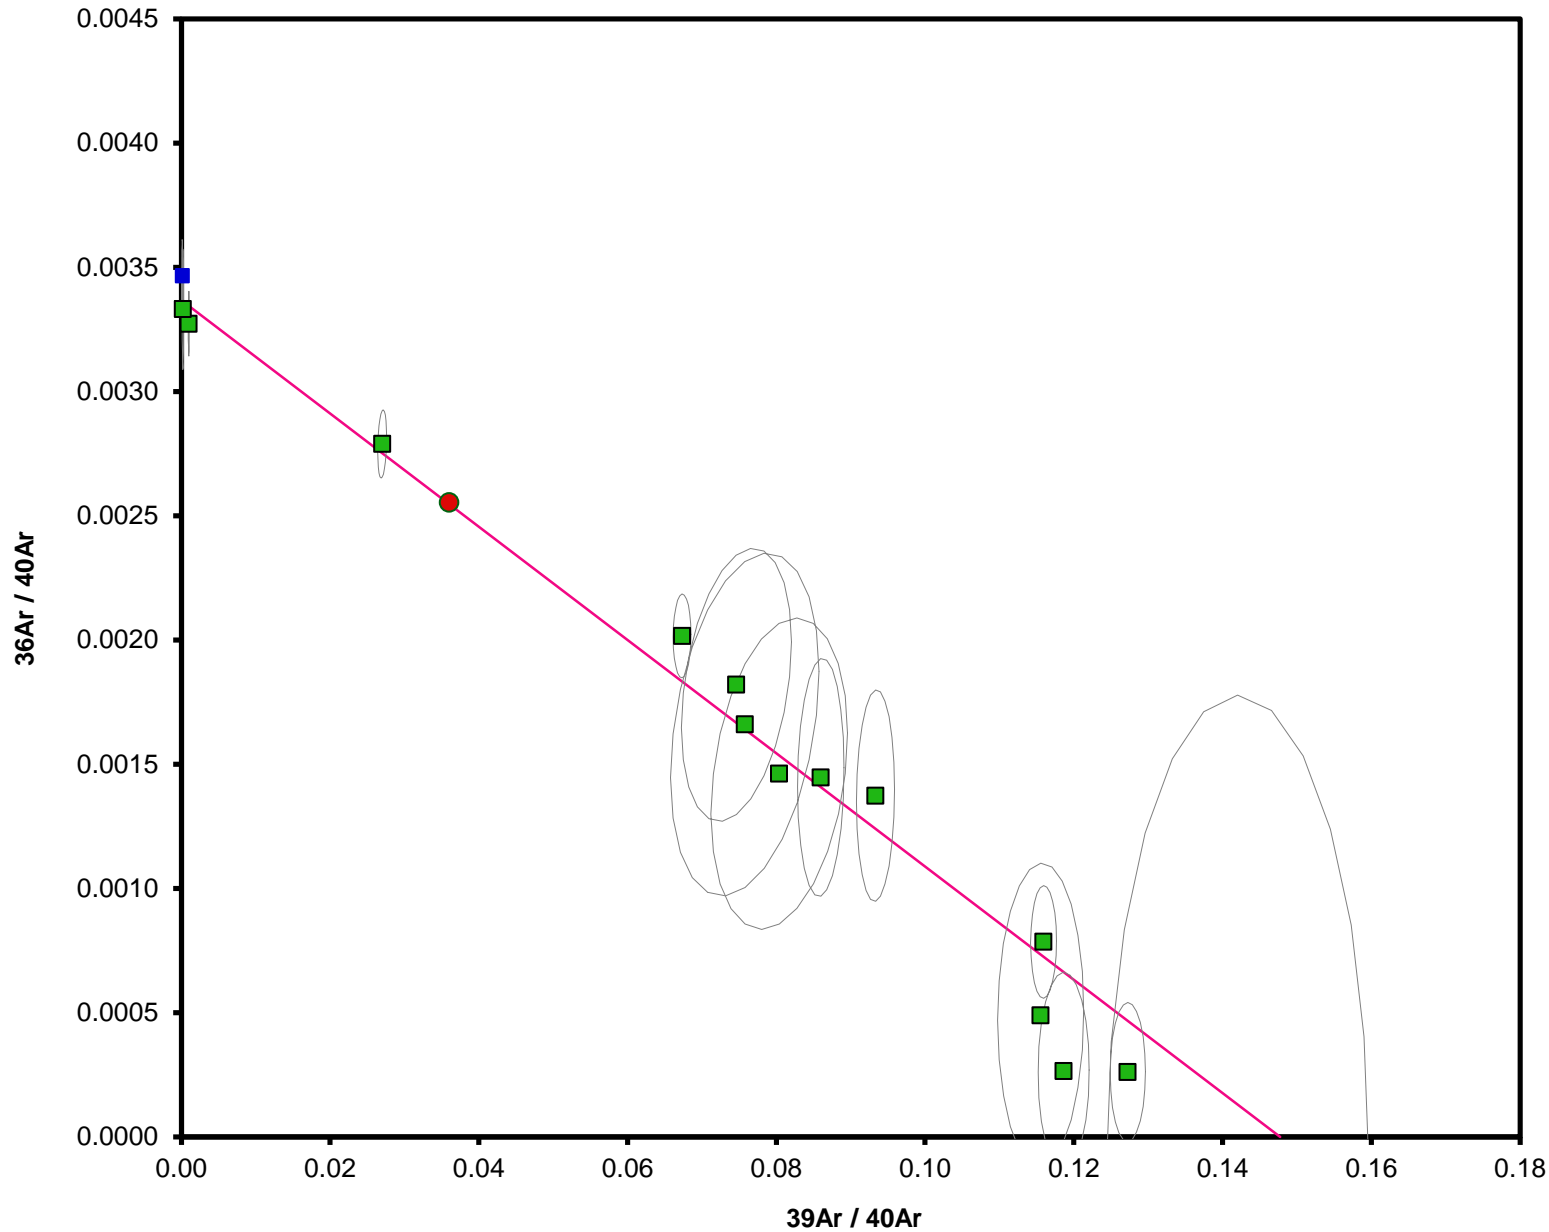

**Ar-Ages in Ma**

**WEIGHTED PLATEAU**

**$8.57 \pm 0.43$**

**TOTAL FUSION**

**$8.39 \pm 0.71$**

**NORMAL ISOCHRON**

**$8.98 \pm 0.52$**

**INVERSE ISOCHRON**

**$8.60 \pm 0.26$**

**MSWD**

**1.14**

**40AR/36AR**

**INTERCEPT**

**$297.0 \pm 4.6$**

**Sample Info**

**Groundmass**

**Furnace**

**Eric Thorn**

**IRR = 18t2h**

**$J = 0.00070700 \pm$**

**$0.00000502$**
