# Supplementary material
Source: publisher figshare collection journal article supplement (https://geolsoc.figshare.com/articles/dataset/_/3453656)
Supplement: Supplementary file 4 [file 1]

| Incremental Heating |         | 36Ar(a)  | 37Ar(ca) | 38Ar(cl) | 39Ar(k)  | 40Ar(r)  | Age $\pm 2\sigma$ (Ma) | 40Ar(r) (%) |
|---------------------|---------|----------|----------|----------|----------|----------|------------------------|-------------|
| 1B16724D            | 600 °C  | 0.000161 | 0.100290 | 0.000003 | 0.004061 | 0.012096 | 3.75 $\pm$ 2.25        | 20.08       |
| 1B16725D            | 700 °C  | 0.000095 | 0.434488 | 0.000003 | 0.016627 | 0.045269 | 3.43 $\pm$ 0.61        | 61.57       |
| 1B16726D            | 800 °C  | 0.000107 | 0.843065 | 0.000000 | 0.033323 | 0.073699 | 2.79 $\pm$ 0.43        | 69.84       |
| 1B16727D            | 870 °C  | 0.000055 | 1.013612 | 0.000016 | 0.040644 | 0.090430 | 2.80 $\pm$ 0.38        | 84.51       |
| 1B16728D            | 950 °C  | 0.000058 | 1.108910 | 0.000000 | 0.045211 | 0.098538 | 2.75 $\pm$ 0.37        | 85.03       |
| 1B16729D            | 1020 °C | 0.000143 | 0.588140 | 0.000000 | 0.026334 | 0.059076 | 2.83 $\pm$ 0.50        | 57.97       |
| 1B16730D            | 1080 °C | 0.000271 | 0.159761 | 0.000001 | 0.008418 | 0.020298 | 3.04 $\pm$ 1.03        | 20.07       |
| 1B16731D            | 1130 °C | 0.000027 | 0.087487 | 0.000003 | 0.006207 | 0.016636 | 3.38 $\pm$ 1.25        | 67.32       |
| 1B16732D            | 1180 °C | 0.000024 | 0.101999 | 0.000010 | 0.003889 | 0.009381 | 3.04 $\pm$ 2.05        | 57.19       |
| 1B16733D            | 1230 °C | 0.000011 | 0.107969 | 0.000002 | 0.004248 | 0.010108 | 3.00 $\pm$ 1.86        | 76.28       |
| 1B16734D            | 1280 °C | 0.000036 | 0.112046 | 0.000002 | 0.004221 | 0.012777 | 3.81 $\pm$ 2.29        | 54.31       |
| 1B16735D            | 1350 °C | 0.000234 | 0.167620 | 0.000005 | 0.005411 | 0.010719 | 2.50 $\pm$ 1.85        | 13.28       |
| 1B16736D            | 1130 °C | 0.000386 | 0.055808 | 0.000002 | 0.001420 | 0.008447 | 7.49 $\pm$ 7.82        | 6.84        |
| $\Sigma$            |         | 0.001607 | 4.881196 | 0.000048 | 0.200013 | 0.467477 |                        |             |

| Information on Analysis         | Results                 | 40(r)/39(k) $\pm 2\sigma$          | Age $\pm 2\sigma$ (Ma)         | MSWD   |
|---------------------------------|-------------------------|------------------------------------|--------------------------------|--------|
| Sample = PLG-C                  | <b>Age Plateau</b>      | 2.2891 $\pm$ 0.1480<br>$\pm$ 6.46% | 2.89 $\pm$ 0.19<br>$\pm$ 6.48% | 0.64   |
| Material = plg                  |                         |                                    | Full External Error $\pm$ 0.19 | 2.18   |
| Location = Furnace              |                         |                                    | Analytical Error $\pm$ 0.19    | 1.0000 |
| Analyst = Fred Jourdan          | <b>Total Fusion Age</b> | 2.3372 $\pm$ 0.1625<br>$\pm$ 6.95% | 2.95 $\pm$ 0.21<br>$\pm$ 6.97% |        |
| Project = ANTILLES-NICE         |                         |                                    | Full External Error $\pm$ 0.21 |        |
| Mass Discrimination Law = POW   |                         |                                    | Analytical Error $\pm$ 0.20    |        |
| Mass Discrimination Law = POW   |                         |                                    |                                |        |
| Irradiation = 18t2h             |                         |                                    |                                |        |
| J = 0.00070000 $\pm$ 0.00000203 |                         |                                    |                                |        |
| FCs = 28.305 $\pm$ 0.037 Ma     |                         |                                    |                                |        |

| $^{39}\text{Ar}(k)$<br>(%) | K/Ca $\pm 2\sigma$  |
|----------------------------|---------------------|
| 2.03                       | 0.0174 $\pm$ 0.0025 |
| 8.31                       | 0.0165 $\pm$ 0.0020 |
| 16.66                      | 0.0170 $\pm$ 0.0020 |
| 20.32                      | 0.0172 $\pm$ 0.0020 |
| 22.60                      | 0.0175 $\pm$ 0.0020 |
| 13.17                      | 0.0193 $\pm$ 0.0023 |
| 4.21                       | 0.0227 $\pm$ 0.0029 |
| 3.10                       | 0.0305 $\pm$ 0.0047 |
| 1.94                       | 0.0164 $\pm$ 0.0025 |
| 2.12                       | 0.0169 $\pm$ 0.0024 |
| 2.11                       | 0.0162 $\pm$ 0.0023 |
| 2.71                       | 0.0139 $\pm$ 0.0020 |
| 0.71                       | 0.0109 $\pm$ 0.0024 |

| $^{39}\text{Ar}(k)$<br>(%,n) | K/Ca $\pm 2\sigma$  |
|------------------------------|---------------------|
| 100.00<br>13                 | 0.0169 $\pm$ 0.0017 |
| Statistical T Ratio          |                     |
| Error Magnification          |                     |
| 13                           | 0.0176 $\pm$ 0.0008 |

| <b>Inverse Isochron</b> |         |  | $39(k)/40(a+r) \pm 2\sigma$ | $36(a)/40(a+r) \pm 2\sigma$ | r.i.   |
|-------------------------|---------|--|-----------------------------|-----------------------------|--------|
| 1B16724D                | 600 °C  |  | 0.067395 ± 0.002069         | 0.002677 ± 0.000400         | 0.1752 |
| 1B16725D                | 700 °C  |  | 0.226178 ± 0.005863         | 0.001287 ± 0.000361         | 0.0772 |
| 1B16726D                | 800 °C  |  | 0.315870 ± 0.006081         | 0.001010 ± 0.000359         | 0.0413 |
| 1B16727D                | 870 °C  |  | 0.379951 ± 0.006780         | 0.000518 ± 0.000383         | 0.0182 |
| 1B16728D                | 950 °C  |  | 0.390232 ± 0.006613         | 0.000501 ± 0.000383         | 0.0165 |
| 1B16729D                | 1020 °C |  | 0.258438 ± 0.004761         | 0.001408 ± 0.000340         | 0.0591 |
| 1B16730D                | 1080 °C |  | 0.083221 ± 0.001767         | 0.002677 ± 0.000225         | 0.1561 |
| 1B16731D                | 1130 °C |  | 0.251195 ± 0.017049         | 0.001094 ± 0.000809         | 0.0879 |
| 1B16732D                | 1180 °C |  | 0.237139 ± 0.023674         | 0.001433 ± 0.001259         | 0.1123 |
| 1B16733D                | 1230 °C |  | 0.320657 ± 0.039916         | 0.000794 ± 0.001538         | 0.0629 |
| 1B16734D                | 1280 °C |  | 0.179432 ± 0.012713         | 0.001530 ± 0.001071         | 0.0976 |
| 1B16735D                | 1350 °C |  | 0.067058 ± 0.002922         | 0.002904 ± 0.000323         | 0.3631 |
| 1B16736D                | 1130 °C |  | 0.011492 ± 0.000403         | 0.003120 ± 0.000237         | 0.2821 |

| <b>Results</b>          | $40(a)/36(a) \pm 2\sigma$                                           | $40(r)/39(k) \pm 2\sigma$  | Age ± 2σ<br>(Ma)                                                                | MSWD                                 |
|-------------------------|---------------------------------------------------------------------|----------------------------|---------------------------------------------------------------------------------|--------------------------------------|
| <b>Inverse Isochron</b> | 309.4416 ± 7.8691<br>± 2.54%                                        | 2.2394 ± 0.0844<br>± 3.77% | 2.82 ± 0.11<br>± 3.81%<br>Full External Error ± 0.11<br>Analytical Error ± 0.11 | 0.52                                 |
| <b>Statistics</b>       | Statistical F ratio<br>Error Magnification<br>Number of Data Points | 1.79<br>1.0000<br>13       | Convergence<br>Number of Iterations<br>Calculated Line                          | 0.0001887225<br>3<br>Weighted York-2 |

| Relative Abundances |         | 36Ar      | %1σ    | 37Ar      | %1σ    | 38Ar      | %1σ    | 39Ar      | %1σ   | 40Ar      | %1σ   | Age ± 2σ (Ma) | 40Ar(r) (%) | 39Ar(k) (%) | K/Ca ± 2σ       |
|---------------------|---------|-----------|--------|-----------|--------|-----------|--------|-----------|-------|-----------|-------|---------------|-------------|-------------|-----------------|
| 1B16724D            | 600 °C  | 0.0001896 | 6.138  | 0.1002904 | 7.294  | 0.0000860 | 8.836  | 0.0041337 | 0.531 | 0.0602526 | 1.417 | 3.75 ± 2.25   | 20.08       | 2.03        | 0.0174 ± 0.0025 |
| 1B16725D            | 700 °C  | 0.0002171 | 5.062  | 0.4344881 | 5.904  | 0.0002364 | 4.981  | 0.0169445 | 0.460 | 0.0735258 | 1.184 | 3.43 ± 0.61   | 61.57       | 8.31        | 0.0165 ± 0.0020 |
| 1B16726D            | 800 °C  | 0.0003442 | 3.676  | 0.8430649 | 5.839  | 0.0004206 | 3.201  | 0.0339388 | 0.399 | 0.1055195 | 0.841 | 2.79 ± 0.43   | 69.84       | 16.66       | 0.0170 ± 0.0020 |
| 1B16727D            | 870 °C  | 0.0003413 | 3.442  | 1.0136116 | 5.773  | 0.0005532 | 1.908  | 0.0413842 | 0.373 | 0.1069998 | 0.775 | 2.80 ± 0.38   | 84.51       | 20.32       | 0.0172 ± 0.0020 |
| 1B16728D            | 950 °C  | 0.0003707 | 3.363  | 1.1089101 | 5.792  | 0.0005524 | 2.938  | 0.0460207 | 0.358 | 0.1158878 | 0.732 | 2.75 ± 0.37   | 85.03       | 22.60       | 0.0175 ± 0.0020 |
| 1B16729D            | 1020 °C | 0.0003093 | 4.564  | 0.5881398 | 5.902  | 0.0003611 | 4.490  | 0.0267633 | 0.382 | 0.1019147 | 0.810 | 2.83 ± 0.50   | 57.97       | 13.17       | 0.0193 ± 0.0023 |
| 1B16730D            | 1080 °C | 0.0003159 | 3.413  | 0.1597614 | 6.447  | 0.0001595 | 6.108  | 0.0085343 | 0.623 | 0.1011544 | 0.835 | 3.04 ± 1.03   | 20.07       | 4.21        | 0.0227 ± 0.0029 |
| 1B16731D            | 1130 °C | 0.0000517 | 18.895 | 0.0874873 | 7.740  | 0.0000873 | 9.356  | 0.0062706 | 0.673 | 0.0247130 | 3.321 | 3.38 ± 1.25   | 67.32       | 3.10        | 0.0305 ± 0.0047 |
| 1B16732D            | 1180 °C | 0.0000523 | 19.178 | 0.1019993 | 7.469  | 0.0000654 | 12.753 | 0.0039635 | 0.473 | 0.0164026 | 4.961 | 3.04 ± 2.05   | 57.19       | 1.94        | 0.0164 ± 0.0025 |
| 1B16733D            | 1230 °C | 0.0000410 | 24.239 | 0.1079687 | 7.076  | 0.0000590 | 12.415 | 0.0043269 | 0.871 | 0.0132509 | 6.154 | 3.00 ± 1.86   | 76.28       | 2.12        | 0.0169 ± 0.0024 |
| 1B16734D            | 1280 °C | 0.0000676 | 18.241 | 0.1120457 | 7.075  | 0.0000638 | 12.057 | 0.0043024 | 0.605 | 0.0235246 | 3.479 | 3.81 ± 2.29   | 54.31       | 2.11        | 0.0162 ± 0.0023 |
| 1B16735D            | 1350 °C | 0.0002816 | 4.104  | 0.1676205 | 7.169  | 0.0001198 | 8.204  | 0.0055332 | 0.504 | 0.0806921 | 2.096 | 2.50 ± 1.85   | 13.28       | 2.71        | 0.0139 ± 0.0020 |
| 1B16736D            | 1130 °C | 0.0004013 | 3.380  | 0.0558082 | 10.759 | 0.0000934 | 8.595  | 0.0014606 | 0.970 | 0.1235485 | 1.371 | 7.49 ± 7.82   | 6.84        | 0.71        | 0.0109 ± 0.0024 |
| Σ                   |         | 0.0029835 | 1.418  | 4.8811960 | 2.281  | 0.0028579 | 1.364  | 0.2035768 | 0.151 | 0.9473863 | 0.387 |               |             |             |                 |

| Information on Analysis and Constants Used in Calculations |                                                                 |
|------------------------------------------------------------|-----------------------------------------------------------------|
| Sample = PLG-C                                             | Age Equations = Min et al. (2000)                               |
| Material = plg                                             | Negative Intensities = Allowed                                  |
| Location = Furnace                                         | Decay Constant 40K = 5.549 ± 0.009 E-10 1/a                     |
| Analyst = Fred Jourdan                                     | Decay Constant 39Ar = 2.940 ± 0.029 E-07 1/h                    |
| Project = ANTILLES-NICE                                    | Decay Constant 37Ar = 8.230 ± 0.082 E-04 1/h                    |
| Mass Discrimination Law = POW                              | Decay Constant 36Cl = 2.303 ± 0.046 E-06 1/a                    |
| Irradiation = 18t2h                                        | Production Ratio 36/38 in Cl = 263.0 ± 13.2                     |
| J = 0.00070000 ± 0.00000203                                | Decay Constant 40K(εC,β <sup>+</sup> ) = 0.576 ± 0.002 E-10 1/a |
| FCs = 28.305 ± 0.037 Ma                                    | Decay Constant 40K(β <sup>-</sup> ) = 4.974 ± 0.009 E-10 1/a    |
| IGSN = Undefined                                           | Abundance Ratio 40K/K = 1.1700 ± 0.0100 E-04                    |
| Preferred Age = Undefined                                  | Atomic Weight K = 39.0983 ± 0.0001 g                            |
| Classification = Undefined                                 |                                                                 |
| Experiment Type = Undefined                                |                                                                 |
| Extraction Method = Undefined                              |                                                                 |
| Heating = 600 sec                                          |                                                                 |
| Isolation = 12.00 min                                      |                                                                 |
| Instrument = MAP215-50                                     |                                                                 |
| Lithology = Undefined                                      |                                                                 |
| Lat-Lon = Undefined - Undefined                            |                                                                 |

| Results                 | 40(r)/39(k) ± 2σ           | Age ± 2σ (Ma)          | MSWD   | 39Ar(k) (%),n       | K/Ca ± 2σ       |
|-------------------------|----------------------------|------------------------|--------|---------------------|-----------------|
| <b>Age Plateau</b>      | 2.2891 ± 0.1480<br>± 6.46% | 2.89 ± 0.19<br>± 6.48% | 0.64   | 100.00<br>13        | 0.0169 ± 0.0017 |
|                         | Full External Error ± 0.19 |                        | 2.18   | Statistical T Ratio |                 |
|                         | Analytical Error ± 0.19    |                        | 1.0000 | Error Magnification |                 |
| <b>Total Fusion Age</b> | 2.3372 ± 0.1625<br>± 6.95% | 2.95 ± 0.21<br>± 6.97% |        | 13                  | 0.0176 ± 0.0008 |
|                         | Full External Error ± 0.21 |                        |        |                     |                 |
|                         | Analytical Error ± 0.20    |                        |        |                     |                 |
| <b>Normal Isochron</b>  | 2.2083 ± 0.1662<br>± 7.53% | 2.78 ± 0.21<br>± 7.54% | 0.39   | 100.00<br>13        |                 |
|                         | Full External Error ± 0.21 |                        | 1.79   | Statistical F ratio |                 |
|                         | Analytical Error ± 0.21    |                        | 1.0000 | Error Magnification |                 |
| <b>Inverse Isochron</b> | 2.2394 ± 0.0844<br>± 3.77% | 2.82 ± 0.11<br>± 3.81% | 0.52   | 100.00<br>13        |                 |
|                         | Full External Error ± 0.11 |                        | 1.79   | Statistical F ratio |                 |
|                         | Analytical Error ± 0.11    |                        | 1.0000 | Error Magnification |                 |

Institute of Geophysics and Planetary Physics  
Scripps Institution of Oceanography, La Jolla, USA

| Procedure<br>Blanks |         | 36Ar     | 1 $\sigma$ | 37Ar     | 1 $\sigma$ | 38Ar     | 1 $\sigma$ | 39Ar     | 1 $\sigma$ | 40Ar     |
|---------------------|---------|----------|------------|----------|------------|----------|------------|----------|------------|----------|
| 1B16724D            | 600 °C  | 0.000051 | 0.000009   | 0.000336 | 0.000012   | 0.000015 | 0.000005   | 0.000018 | 0.000005   | 0.011957 |
| 1B16725D            | 700 °C  | 0.000057 | 0.000009   | 0.000336 | 0.000012   | 0.000015 | 0.000005   | 0.000018 | 0.000005   | 0.012492 |
| 1B16726D            | 800 °C  | 0.000062 | 0.000009   | 0.000336 | 0.000012   | 0.000015 | 0.000005   | 0.000018 | 0.000005   | 0.013166 |
| 1B16727D            | 870 °C  | 0.000066 | 0.000009   | 0.000336 | 0.000012   | 0.000015 | 0.000005   | 0.000018 | 0.000005   | 0.013833 |
| 1B16728D            | 950 °C  | 0.000070 | 0.000009   | 0.000336 | 0.000012   | 0.000016 | 0.000005   | 0.000018 | 0.000005   | 0.014949 |
| 1B16729D            | 1020 °C | 0.000075 | 0.000009   | 0.000336 | 0.000012   | 0.000017 | 0.000005   | 0.000018 | 0.000005   | 0.016388 |
| 1B16730D            | 1080 °C | 0.000081 | 0.000009   | 0.000336 | 0.000012   | 0.000019 | 0.000005   | 0.000018 | 0.000005   | 0.018097 |
| 1B16731D            | 1130 °C | 0.000087 | 0.000009   | 0.000336 | 0.000012   | 0.000020 | 0.000005   | 0.000018 | 0.000005   | 0.019947 |
| 1B16732D            | 1180 °C | 0.000094 | 0.000009   | 0.000336 | 0.000012   | 0.000022 | 0.000005   | 0.000018 | 0.000005   | 0.022266 |
| 1B16733D            | 1230 °C | 0.000102 | 0.000009   | 0.000336 | 0.000012   | 0.000025 | 0.000005   | 0.000018 | 0.000005   | 0.025139 |
| 1B16734D            | 1280 °C | 0.000113 | 0.000009   | 0.000336 | 0.000012   | 0.000027 | 0.000005   | 0.000018 | 0.000005   | 0.028657 |
| 1B16735D            | 1350 °C | 0.000143 | 0.000010   | 0.000338 | 0.000014   | 0.000036 | 0.000005   | 0.000045 | 0.000007   | 0.043105 |
| 1B16736D            | 1130 °C | 0.000089 | 0.000010   | 0.000338 | 0.000014   | 0.000021 | 0.000005   | 0.000019 | 0.000007   | 0.019332 |

---

$1\sigma$

---

0.000811  
0.000811  
0.000811  
0.000811  
0.000811  
0.000811  
0.000811  
0.000811  
0.000811  
0.000811  
0.000811  
0.001686  
0.001686

---

| <b>Sample Parameters</b> |         | <b>Sample</b> | <b>Material</b> | <b>Location</b> |
|--------------------------|---------|---------------|-----------------|-----------------|
| 1B16724D                 | 600 °C  | P1g-C         | plg             | Furnace         |
| 1B16725D                 | 700 °C  | P1g-C         | plg             | Furnace         |
| 1B16726D                 | 800 °C  | P1g-C         | plg             | Furnace         |
| 1B16727D                 | 870 °C  | P1g-C         | plg             | Furnace         |
| 1B16728D                 | 950 °C  | P1g-C         | plg             | Furnace         |
| 1B16729D                 | 1020 °C | P1g-C         | plg             | Furnace         |
| 1B16730D                 | 1080 °C | P1g-C         | plg             | Furnace         |
| 1B16731D                 | 1130 °C | P1g-C         | plg             | Furnace         |
| 1B16732D                 | 1180 °C | P1g-C         | plg             | Furnace         |
| 1B16733D                 | 1230 °C | P1g-C         | plg             | Furnace         |
| 1B16734D                 | 1280 °C | P1g-C         | plg             | Furnace         |
| 1B16735D                 | 1350 °C | P1g-C         | plg             | Furnace         |
| 1B16736D                 | 1130 °C | P1g-C         | plg             | Furnace         |

| Analyst      | Temp |
|--------------|------|
| Fred Jourdan | 600  |
| Fred Jourdan | 700  |
| Fred Jourdan | 800  |
| Fred Jourdan | 870  |
| Fred Jourdan | 950  |
| Fred Jourdan | 1020 |
| Fred Jourdan | 1080 |
| Fred Jourdan | 1130 |
| Fred Jourdan | 1180 |
| Fred Jourdan | 1230 |
| Fred Jourdan | 1280 |
| Fred Jourdan | 1350 |
| Fred Jourdan | 1130 |



| Standard<br>(in Ma) | %1 $\sigma$ | J      | %1 $\sigma$ | MDF      | %1 $\sigma$ | Volume<br>Ratio | Sensitivity<br>(mol/volt) |
|---------------------|-------------|--------|-------------|----------|-------------|-----------------|---------------------------|
| 28.305              | 0.13        | 0.0007 | 0.29        | 1.006575 | 0.32        | 1               | 4.050E-14                 |
| 28.305              | 0.13        | 0.0007 | 0.29        | 1.006575 | 0.32        | 1               | 4.050E-14                 |
| 28.305              | 0.13        | 0.0007 | 0.29        | 1.006575 | 0.32        | 1               | 4.050E-14                 |
| 28.305              | 0.13        | 0.0007 | 0.29        | 1.006575 | 0.32        | 1               | 4.050E-14                 |
| 28.305              | 0.13        | 0.0007 | 0.29        | 1.006575 | 0.32        | 1               | 4.050E-14                 |
| 28.305              | 0.13        | 0.0007 | 0.29        | 1.006575 | 0.32        | 1               | 4.050E-14                 |
| 28.305              | 0.13        | 0.0007 | 0.29        | 1.006575 | 0.32        | 1               | 4.050E-14                 |
| 28.305              | 0.13        | 0.0007 | 0.29        | 1.006575 | 0.32        | 1               | 4.050E-14                 |
| 28.305              | 0.13        | 0.0007 | 0.29        | 1.006575 | 0.32        | 1               | 4.050E-14                 |
| 28.305              | 0.13        | 0.0007 | 0.29        | 1.006575 | 0.32        | 1               | 4.050E-14                 |
| 28.305              | 0.13        | 0.0007 | 0.29        | 1.006575 | 0.32        | 1               | 4.050E-14                 |
| 28.305              | 0.13        | 0.0007 | 0.29        | 1.006575 | 0.32        | 1               | 4.050E-14                 |
| 28.305              | 0.13        | 0.0007 | 0.29        | 1.006575 | 0.32        | 1               | 4.050E-14                 |
| 28.305              | 0.13        | 0.0007 | 0.29        | 1.006575 | 0.32        | 1               | 4.050E-14                 |
| 28.305              | 0.13        | 0.0007 | 0.29        | 1.006575 | 0.32        | 1               | 4.050E-14                 |

Institute of Geophysics and Planetary Physics  
 Scripps Institution of Oceanography, La Jolla, USA

| Day | Month | Year | Hour | Min | Resist | Irradiation | Project       | Experiment  | Nmb | Standard Name |
|-----|-------|------|------|-----|--------|-------------|---------------|-------------|-----|---------------|
| 14  | JUN   | 2011 | 22   | 02  | 001    | I8t2h       | Antilles-Nice | Verati-plgC | 01  | FCs           |
| 14  | JUN   | 2011 | 22   | 56  | 001    | I8t2h       | Antilles-Nice | Verati-plgC | 01  | FCs           |
| 14  | JUN   | 2011 | 23   | 50  | 001    | I8t2h       | Antilles-Nice | Verati-plgC | 01  | FCs           |
| 15  | JUN   | 2011 | 00   | 43  | 001    | I8t2h       | Antilles-Nice | Verati-plgC | 01  | FCs           |
| 15  | JUN   | 2011 | 01   | 36  | 001    | I8t2h       | Antilles-Nice | Verati-plgC | 01  | FCs           |
| 15  | JUN   | 2011 | 02   | 29  | 001    | I8t2h       | Antilles-Nice | Verati-plgC | 01  | FCs           |
| 15  | JUN   | 2011 | 03   | 22  | 001    | I8t2h       | Antilles-Nice | Verati-plgC | 01  | FCs           |
| 15  | JUN   | 2011 | 04   | 15  | 001    | I8t2h       | Antilles-Nice | Verati-plgC | 01  | FCs           |
| 15  | JUN   | 2011 | 04   | 15  | 001    | I8t2h       | Antilles-Nice | Verati-plgC | 01  | FCs           |
| 15  | JUN   | 2011 | 04   | 15  | 001    | I8t2h       | Antilles-Nice | Verati-plgC | 01  | FCs           |
| 15  | JUN   | 2011 | 04   | 15  | 001    | I8t2h       | Antilles-Nice | Verati-plgC | 01  | FCs           |
| 15  | JUN   | 2011 | 04   | 15  | 001    | I8t2h       | Antilles-Nice | Verati-plgC | 01  | FCs           |

| Irradiation<br>Constants |         | 40/36(a) |             | 40/36(c) |             | 38/36(a) |             | 38/36(c) |             |
|--------------------------|---------|----------|-------------|----------|-------------|----------|-------------|----------|-------------|
|                          |         |          | %1 $\sigma$ |          | %1 $\sigma$ |          | %1 $\sigma$ |          | %1 $\sigma$ |
| 1B16724D                 | 600 °C  | 298.56   | 0.1         | 0.018    | 35          | 0.1869   | 0.1         | 1.493    | 3           |
| 1B16725D                 | 700 °C  | 298.56   | 0.1         | 0.018    | 35          | 0.1869   | 0.1         | 1.493    | 3           |
| 1B16726D                 | 800 °C  | 298.56   | 0.1         | 0.018    | 35          | 0.1869   | 0.1         | 1.493    | 3           |
| 1B16727D                 | 870 °C  | 298.56   | 0.1         | 0.018    | 35          | 0.1869   | 0.1         | 1.493    | 3           |
| 1B16728D                 | 950 °C  | 298.56   | 0.1         | 0.018    | 35          | 0.1869   | 0.1         | 1.493    | 3           |
| 1B16729D                 | 1020 °C | 298.56   | 0.1         | 0.018    | 35          | 0.1869   | 0.1         | 1.493    | 3           |
| 1B16730D                 | 1080 °C | 298.56   | 0.1         | 0.018    | 35          | 0.1869   | 0.1         | 1.493    | 3           |
| 1B16731D                 | 1130 °C | 298.56   | 0.1         | 0.018    | 35          | 0.1869   | 0.1         | 1.493    | 3           |
| 1B16732D                 | 1180 °C | 298.56   | 0.1         | 0.018    | 35          | 0.1869   | 0.1         | 1.493    | 3           |
| 1B16733D                 | 1230 °C | 298.56   | 0.1         | 0.018    | 35          | 0.1869   | 0.1         | 1.493    | 3           |
| 1B16734D                 | 1280 °C | 298.56   | 0.1         | 0.018    | 35          | 0.1869   | 0.1         | 1.493    | 3           |
| 1B16735D                 | 1350 °C | 298.56   | 0.1         | 0.018    | 35          | 0.1869   | 0.1         | 1.493    | 3           |
| 1B16736D                 | 1130 °C | 298.56   | 0.1         | 0.018    | 35          | 0.1869   | 0.1         | 1.493    | 3           |



| K/Ca | %1 $\sigma$ | K/Cl | %1 $\sigma$ | Ca/Cl | %1 $\sigma$ |
|------|-------------|------|-------------|-------|-------------|
| 0.43 | 0           | 0    | 0           | 0     | 0           |
| 0.43 | 0           | 0    | 0           | 0     | 0           |
| 0.43 | 0           | 0    | 0           | 0     | 0           |
| 0.43 | 0           | 0    | 0           | 0     | 0           |
| 0.43 | 0           | 0    | 0           | 0     | 0           |
| 0.43 | 0           | 0    | 0           | 0     | 0           |
| 0.43 | 0           | 0    | 0           | 0     | 0           |
| 0.43 | 0           | 0    | 0           | 0     | 0           |
| 0.43 | 0           | 0    | 0           | 0     | 0           |
| 0.43 | 0           | 0    | 0           | 0     | 0           |
| 0.43 | 0           | 0    | 0           | 0     | 0           |
| 0.43 | 0           | 0    | 0           | 0     | 0           |
| 0.43 | 0           | 0    | 0           | 0     | 0           |
| 0.43 | 0           | 0    | 0           | 0     | 0           |
| 0.43 | 0           | 0    | 0           | 0     | 0           |

VERATI-PLGC.AGE >>> PLG-C >>> ANTILLES-NICE PROJECT

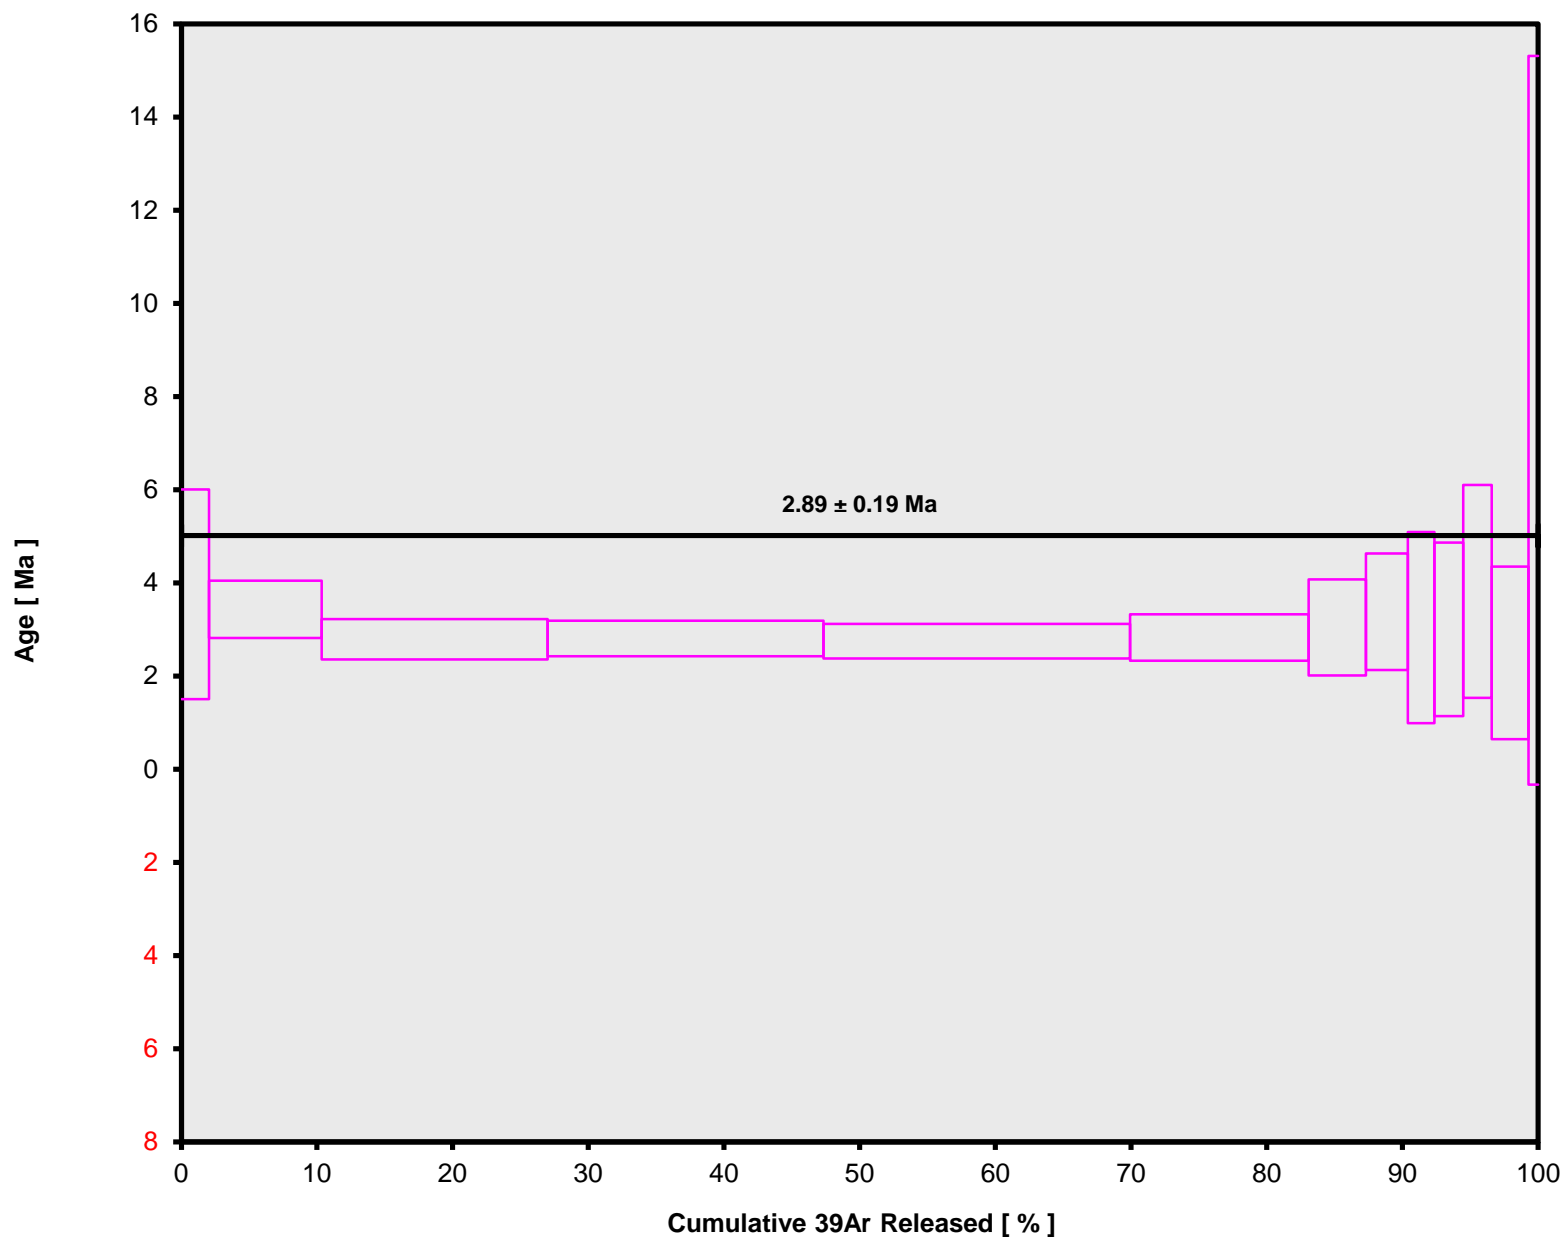

Ar-Ages in Ma

WEIGHTED PLATEAU  
 $2.89 \pm 0.19$   
TOTAL FUSION  
 $2.95 \pm 0.21$   
NORMAL ISOCHRON  
 $2.78 \pm 0.21$   
INVERSE ISOCHRON  
 $2.82 \pm 0.11$

MSWD  
0.64

Sample Info

plg  
Furnace  
Fred Jourdan

IRR = 18t2h  
J =  $0.00070000 \pm 0.00000203$

VERATI-PLGC.AGE >>> PLG-C >>> ANTILLES-NICE PROJECT

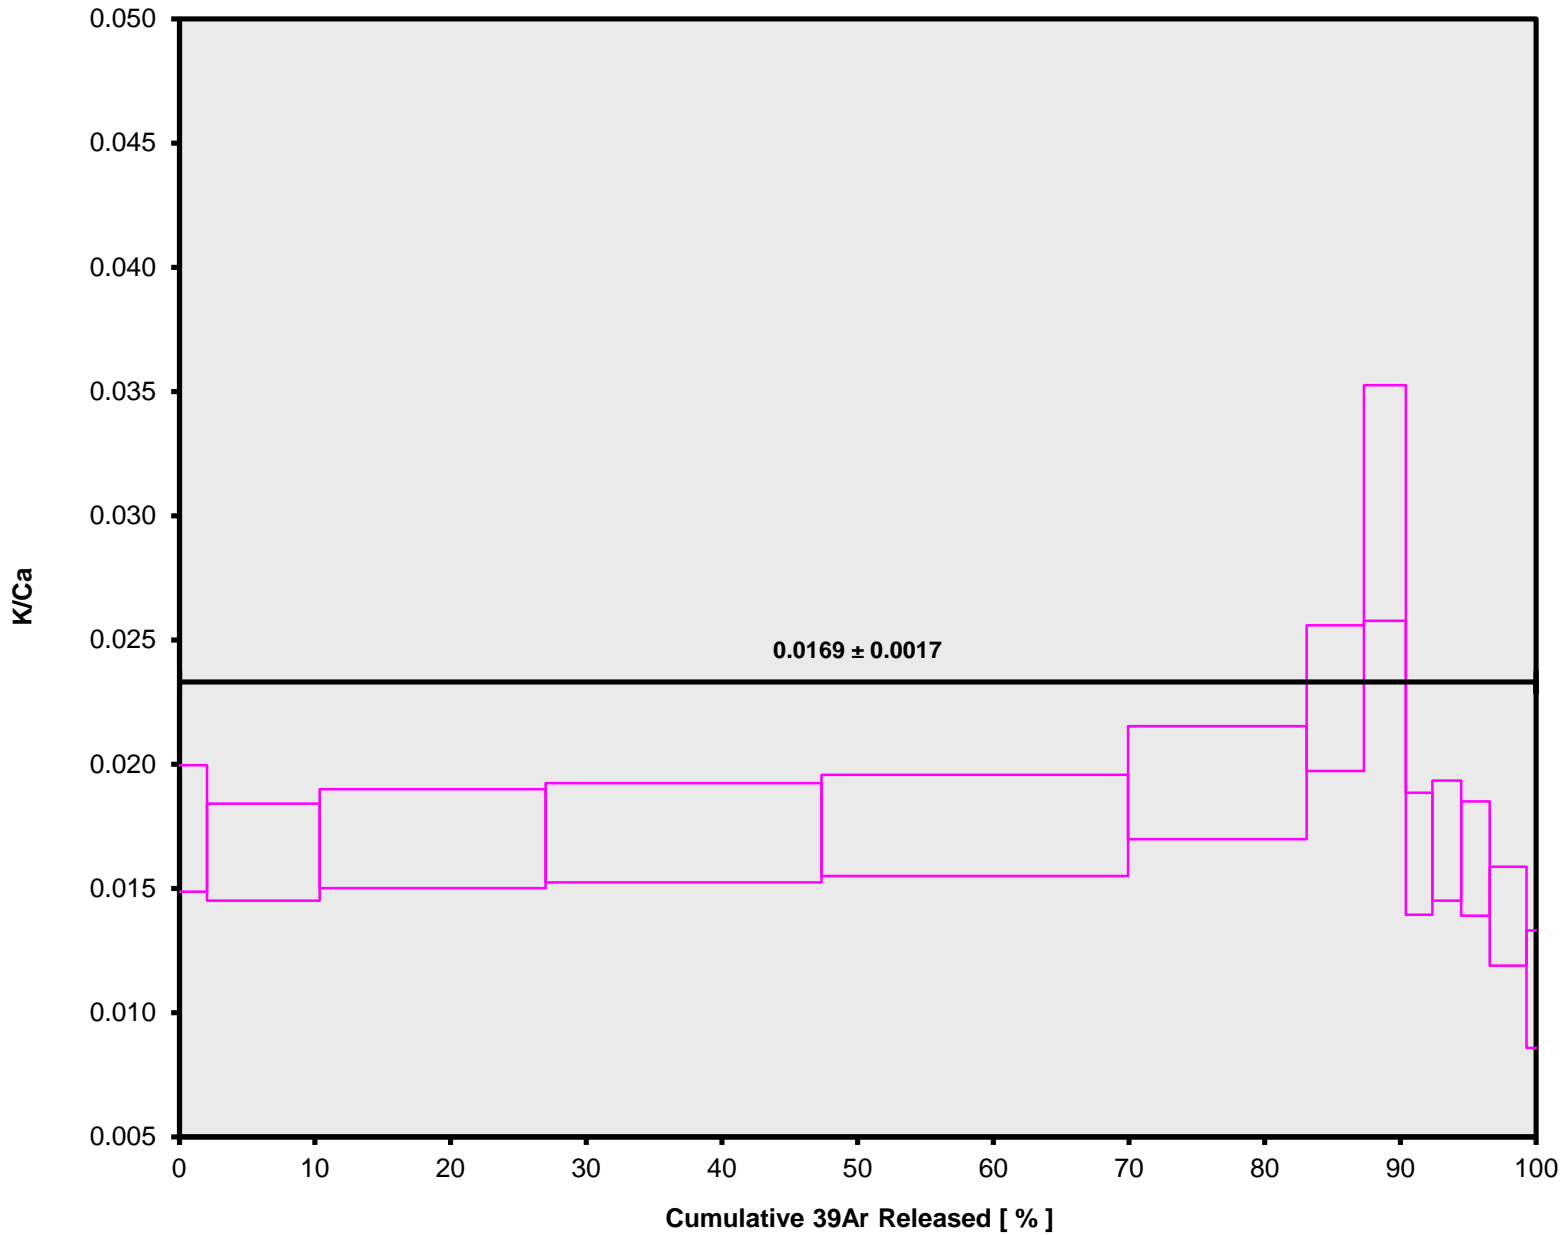

Ar-Ages in Ma

WEIGHTED PLATEAU  
2.89 ± 0.19  
TOTAL FUSION  
2.95 ± 0.21  
NORMAL ISOCHRON  
2.78 ± 0.21  
INVERSE ISOCHRON  
2.82 ± 0.11

Sample Info

plg  
Furnace  
Fred Jourdan

IRR = 18t2h  
J = 0.00070000 ±  
0.00000203

VERATI-PLGC.AGE >>> PLG-C >>> ANTILLES-NICE PROJECT

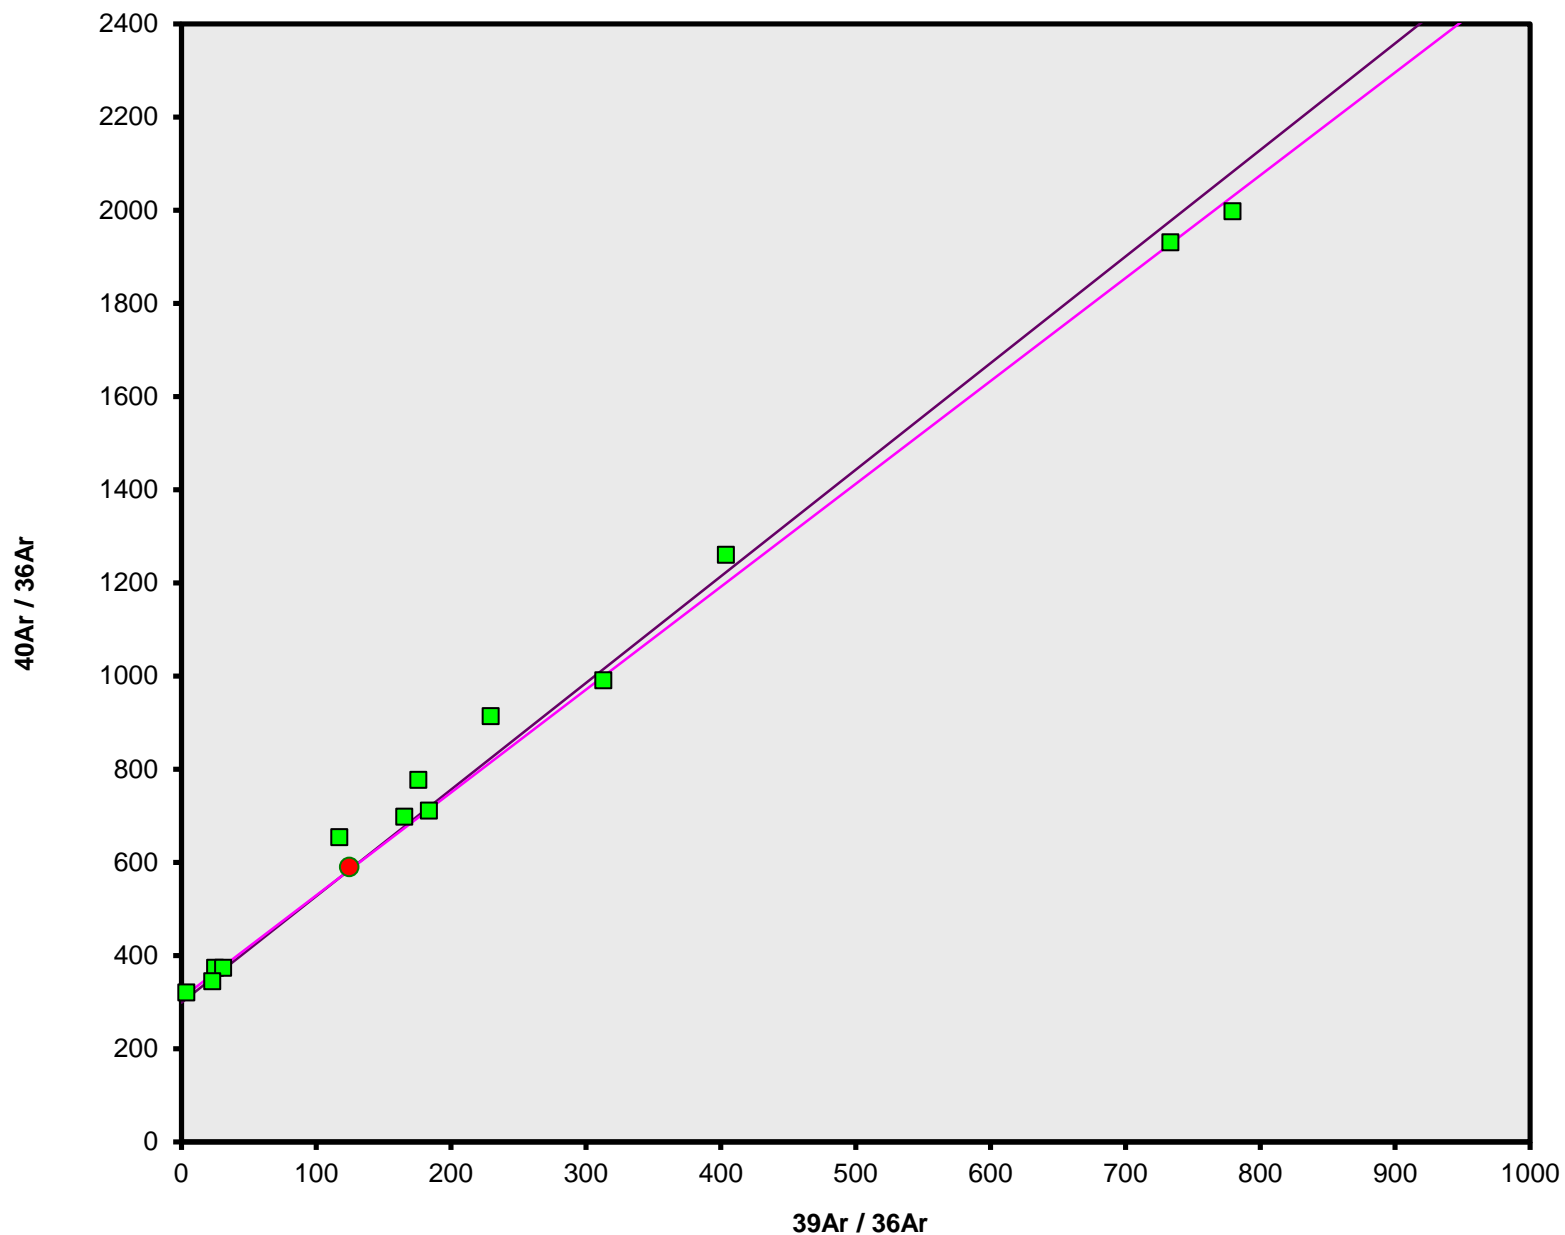

Ar-Ages in Ma

WEIGHTED PLATEAU

$2.89 \pm 0.19$

TOTAL FUSION

$2.95 \pm 0.21$

NORMAL ISOCHRON

$2.78 \pm 0.21$

INVERSE ISOCHRON

$2.82 \pm 0.11$

MSWD

0.39

40AR/36AR

INTERCEPT

$308.3 \pm 15.6$

Sample Info

plg

Furnace

Fred Jourdan

IRR = 18t2h

J =  $0.00070000 \pm$

$0.00000203$



VERATI-PLGC.AGE >>> PLG-C >>> ANTILLES-NICE PROJECT

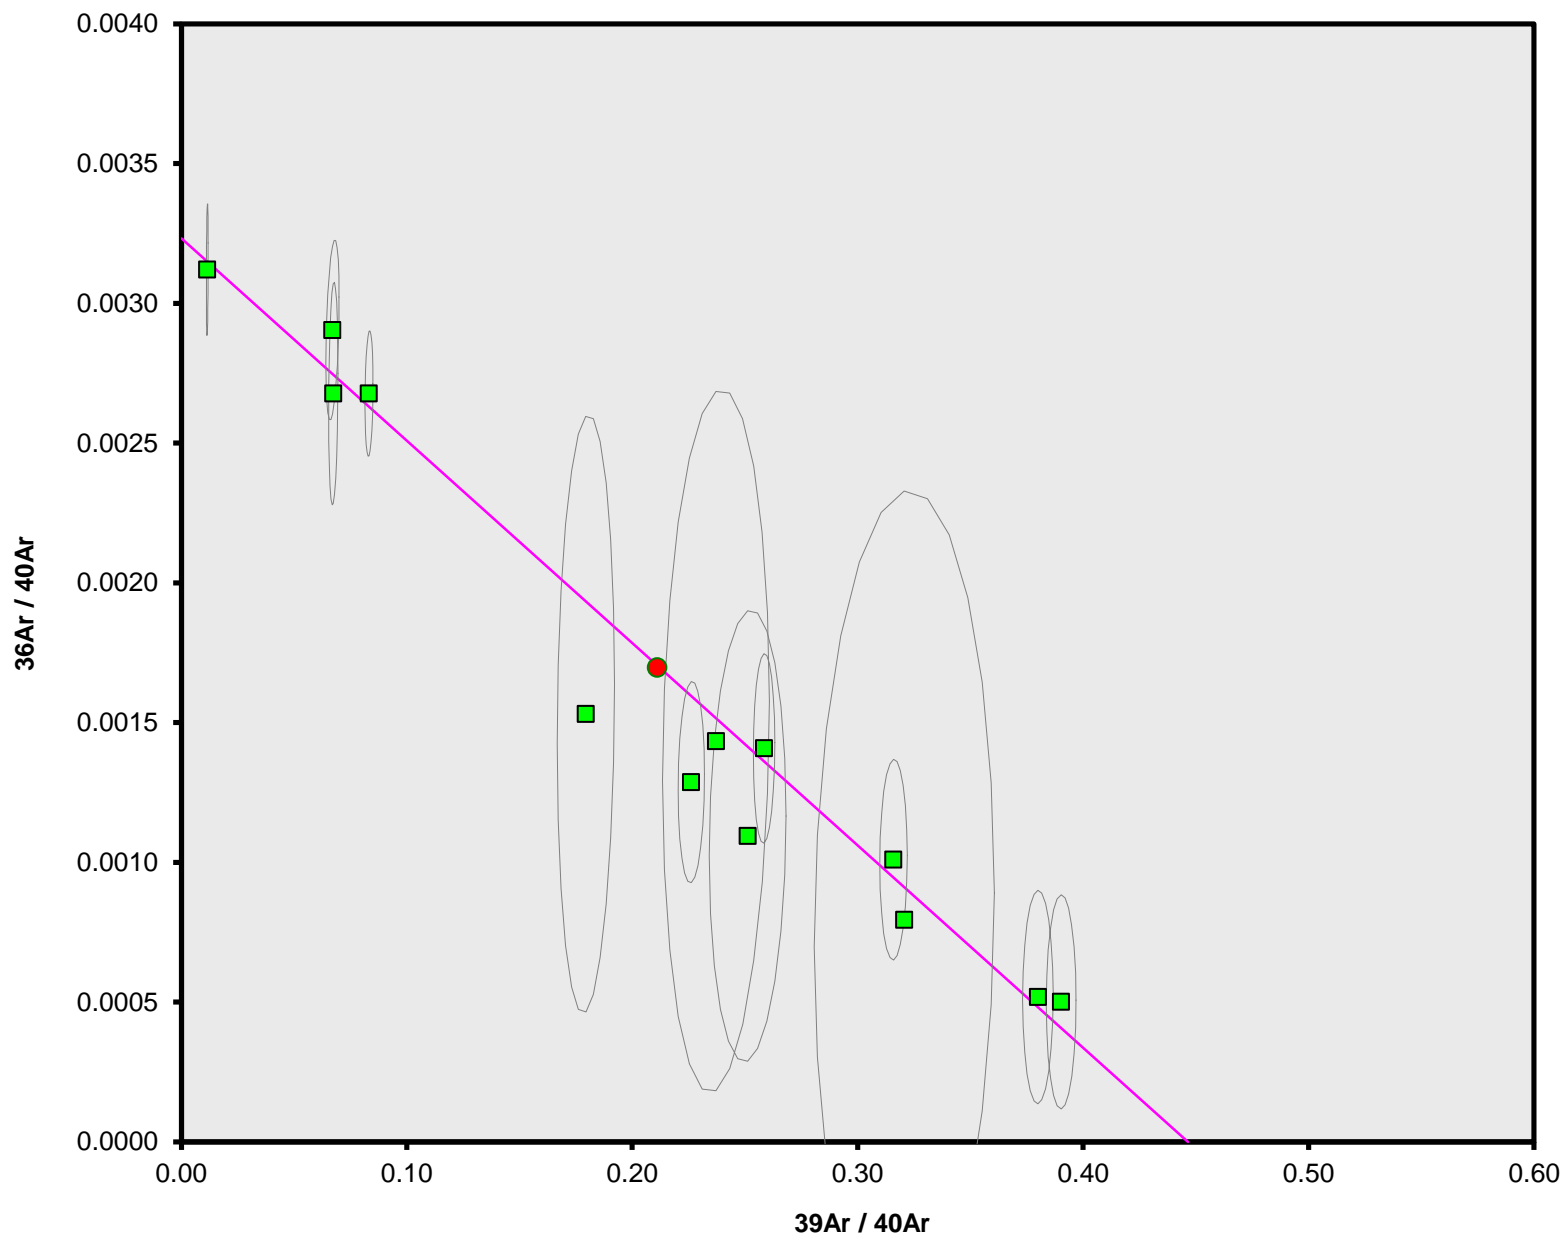

Ar-Ages in Ma

WEIGHTED PLATEAU

$2.89 \pm 0.19$

TOTAL FUSION

$2.95 \pm 0.21$

NORMAL ISOCHRON

$2.78 \pm 0.21$

INVERSE ISOCHRON

$2.82 \pm 0.11$

MSWD

0.52

40AR/36AR

INTERCEPT

$309.4 \pm 7.9$

Sample Info

plg

Furnace

Fred Jourdan

IRR = 18t2h

$J = 0.00070000 \pm$

0.00000203
