# Supplementary material
Source: publisher figshare collection journal article supplement (https://geolsoc.figshare.com/articles/dataset/_/3453656)
Supplement: Supplementary file 5 [file 1]

| Incremental Heating |         |   | 36Ar(a)  | 37Ar(ca) | 38Ar(cl) | 39Ar(k)  | 40Ar(r)  | Age $\pm 2\sigma$<br>(Ma) | 40Ar(r)<br>(%) |
|---------------------|---------|---|----------|----------|----------|----------|----------|---------------------------|----------------|
| 1B16079D            | 600 °C  | ☞ | 0.000034 | 0.033821 | 0.000003 | 0.001780 | 0.001016 | 0.72 $\pm$ 3.70           | 11.14          |
| 1B16080D            | 700 °C  | ☞ | 0.000134 | 0.134800 | 0.000014 | 0.007283 | 0.005427 | 0.94 $\pm$ 1.00           | 11.91          |
| 1B16081D            | 800 °C  | ☞ | 0.000121 | 0.310300 | 0.000000 | 0.019147 | 0.021660 | 1.42 $\pm$ 0.46           | 37.41          |
| 1B16082D            | 870 °C  | ☞ | 0.000105 | 0.334871 | 0.000000 | 0.022411 | 0.016930 | 0.95 $\pm$ 0.44           | 35.11          |
| 1B16083D            | 950 °C  | ☞ | 0.000111 | 0.292035 | 0.000000 | 0.020227 | 0.016996 | 1.06 $\pm$ 0.42           | 33.83          |
| 1B16084D            | 1020 °C | ☞ | 0.000346 | 0.193756 | 0.000004 | 0.014013 | 0.009413 | 0.85 $\pm$ 0.68           | 8.35           |
| 1B16085D            | 1080 °C | ☞ | 0.000060 | 0.137395 | 0.000002 | 0.009813 | 0.007183 | 0.92 $\pm$ 0.69           | 28.77          |
| 1B16086D            | 1130 °C | ☞ | 0.000053 | 0.122230 | 0.000010 | 0.009778 | 0.006295 | 0.81 $\pm$ 0.72           | 28.41          |
| 1B16087D            | 1180 °C | ☞ | 0.000061 | 0.162700 | 0.000038 | 0.014763 | 0.012989 | 1.11 $\pm$ 0.57           | 41.80          |
| 1B16088D            | 1230 °C | ☞ | 0.000142 | 0.288991 | 0.000000 | 0.026067 | 0.025460 | 1.23 $\pm$ 0.43           | 37.49          |
| 1B16089D            | 1280 °C | ☞ | 0.000114 | 0.357330 | 0.000015 | 0.028822 | 0.030335 | 1.33 $\pm$ 0.43           | 47.21          |
| 1B16090D            | 1350 °C | ☞ | 0.001037 | 0.713861 | 0.000046 | 0.040965 | 0.053368 | 1.64 $\pm$ 0.45           | 14.71          |
| 1B16091D            | 1420 °C | ☞ | 0.001517 | 0.003156 | 0.000006 | 0.000054 | 0.007698 | 170.16 $\pm$ 392.34       | 1.67           |
| 1B16092D            | 1500 °C | ☞ | 0.000324 | 0.001947 | 0.000000 | 0.000014 | 0.006119 | 641.59 $\pm$ 1602.90      | 6.74           |
| 1B16093D            | 1550 °C | ☞ | 0.000480 | 0.000342 | 0.000000 | 0.000017 | 0.004330 | 297.71 $\pm$ 770.48       | 2.94           |
| 1B15981D            | 600 °C  | ☞ | 0.000024 | 0.047054 | 0.000011 | 0.002286 | 0.000905 | 0.50 $\pm$ 3.10           | 11.22          |
| 1B15982D            | 700 °C  | ☞ | 0.000067 | 0.137372 | 0.000000 | 0.007555 | 0.011771 | 1.96 $\pm$ 0.86           | 37.10          |
| 1B15983D            | 800 °C  | ☞ | 0.000071 | 0.261725 | 0.000000 | 0.017599 | 0.027162 | 1.94 $\pm$ 0.42           | 56.09          |
| 1B15984D            | 870 °C  | ☞ | 0.000097 | 0.276925 | 0.000007 | 0.020341 | 0.012683 | 0.79 $\pm$ 0.35           | 30.53          |
| 1B15985D            | 950 °C  | ☞ | 0.000090 | 0.262199 | 0.000000 | 0.019144 | 0.014708 | 0.97 $\pm$ 0.49           | 35.41          |
| 1B15986D            | 1020 °C | ☞ | 0.000258 | 0.183730 | 0.000008 | 0.014486 | 0.011773 | 1.02 $\pm$ 0.63           | 13.25          |
| 1B15987D            | 1080 °C | ☞ | 0.000061 | 0.118492 | 0.000000 | 0.009663 | 0.012072 | 1.57 $\pm$ 0.79           | 39.69          |
| 1B15988D            | 1130 °C | ☞ | 0.000409 | 0.112257 | 0.000018 | 0.009541 | 0.008074 | 1.07 $\pm$ 1.39           | 6.20           |
| 1B15989D            | 1180 °C | ☞ | 0.000038 | 0.152924 | 0.000023 | 0.014352 | 0.013002 | 1.14 $\pm$ 0.55           | 53.48          |
| 1B15990D            | 1230 °C | ☞ | 0.000090 | 0.251943 | 0.000009 | 0.022993 | 0.019705 | 1.08 $\pm$ 0.50           | 42.34          |
| 1B15991D            | 1280 °C | ☞ | 0.000105 | 0.305711 | 0.000000 | 0.023660 | 0.027956 | 1.49 $\pm$ 0.48           | 47.15          |
| 1B15992D            | 1350 °C | ☞ | 0.001637 | 0.477265 | 0.000020 | 0.028787 | 0.043056 | 1.88 $\pm$ 0.84           | 8.10           |
| 1B15993D            | 1420 °C | ☞ | 0.000428 | 0.003289 | 0.000006 | 0.000026 | 0.002317 | 107.71 $\pm$ 507.73       | 1.78           |
| 1B15994D            | 1500 °C | ☞ | 0.000465 | 0.002680 | 0.000018 | 0.000033 | 0.003182 | 118.23 $\pm$ 418.68       | 2.24           |
| 1B15995D            | 1550 °C | ☞ | 0.000284 | 0.001840 | 0.000000 | 0.000009 | 0.006411 | 761.89 $\pm$ 2017.57      | 7.03           |
| $\Sigma$            |         |   | 0.008763 | 5.682938 | 0.000257 | 0.405627 | 0.425727 |                           |                |

**Information on Analysis**

Sample = PLG-F  
 Material = plg  
 Location = Furnace  
 Analyst = Eric Thorn  
 Project = ANTILLES-NICE  
 Mass Discrimination Law = POW  
 Irradiation = 18t2h  
 J = 0.00069900  $\pm$  0.00000203  
 GA1550 = 99.769  $\pm$  0.110 Ma

| Results                 | 40(r)/39(k) $\pm 2\sigma$           | Age $\pm 2\sigma$<br>(Ma)       | MSWD   |
|-------------------------|-------------------------------------|---------------------------------|--------|
| <b>Age Plateau</b>      | 0.9134 $\pm$ 0.0940<br>$\pm$ 10.29% | 1.15 $\pm$ 0.12<br>$\pm$ 10.30% | 0.98   |
|                         |                                     | Full External Error $\pm$ 0.12  | 2.06   |
|                         |                                     | Analytical Error $\pm$ 0.12     | 1.0000 |
| <b>Total Fusion Age</b> | 1.0496 $\pm$ 0.1294<br>$\pm$ 12.33% | 1.32 $\pm$ 0.16<br>$\pm$ 12.34% |        |
|                         |                                     | Full External Error $\pm$ 0.16  |        |
|                         |                                     | Analytical Error $\pm$ 0.16     |        |

| $^{39}\text{Ar}(k)$<br>(%) | K/Ca $\pm 2\sigma$  |
|----------------------------|---------------------|
| 0.44                       | 0.0226 $\pm$ 0.0045 |
| 1.80                       | 0.0232 $\pm$ 0.0027 |
| 4.72                       | 0.0265 $\pm$ 0.0026 |
| 5.53                       | 0.0288 $\pm$ 0.0029 |
| 4.99                       | 0.0298 $\pm$ 0.0031 |
| 3.45                       | 0.0311 $\pm$ 0.0032 |
| 2.42                       | 0.0307 $\pm$ 0.0032 |
| 2.41                       | 0.0344 $\pm$ 0.0041 |
| 3.64                       | 0.0390 $\pm$ 0.0048 |
| 6.43                       | 0.0388 $\pm$ 0.0040 |
| 7.11                       | 0.0347 $\pm$ 0.0035 |
| 10.10                      | 0.0247 $\pm$ 0.0024 |
| 0.01                       | 0.0074 $\pm$ 0.0148 |
| 0.00                       | 0.0032 $\pm$ 0.0077 |
| 0.00                       | 0.0212 $\pm$ 0.2796 |
| 0.56                       | 0.0209 $\pm$ 0.0037 |
| 1.86                       | 0.0236 $\pm$ 0.0025 |
| 4.34                       | 0.0289 $\pm$ 0.0029 |
| 5.01                       | 0.0316 $\pm$ 0.0032 |
| 4.72                       | 0.0314 $\pm$ 0.0031 |
| 3.57                       | 0.0339 $\pm$ 0.0034 |
| 2.38                       | 0.0351 $\pm$ 0.0038 |
| 2.35                       | 0.0365 $\pm$ 0.0038 |
| 3.54                       | 0.0404 $\pm$ 0.0044 |
| 5.67                       | 0.0392 $\pm$ 0.0039 |
| 5.83                       | 0.0333 $\pm$ 0.0034 |
| 7.10                       | 0.0259 $\pm$ 0.0026 |
| 0.01                       | 0.0034 $\pm$ 0.0046 |
| 0.01                       | 0.0053 $\pm$ 0.0079 |
| 0.00                       | 0.0020 $\pm$ 0.0063 |

| $^{39}\text{Ar}(k)$<br>(%,n) | K/Ca $\pm 2\sigma$  |
|------------------------------|---------------------|
| 93.24<br>27                  | 0.0291 $\pm$ 0.0030 |
| Statistical T Ratio          |                     |
| Error Magnification          |                     |
| 30                           | 0.0307 $\pm$ 0.0007 |

| Inverse Isochron |         |  | $39(k)/40(a+r) \pm 2\sigma$ | $36(a)/40(a+r) \pm 2\sigma$ | r.i.   |
|------------------|---------|--|-----------------------------|-----------------------------|--------|
| 1B16079D         | 600 °C  |  | 0.195203 ± 0.050600         | 0.003723 ± 0.001963         | 0.4895 |
| 1B16080D         | 700 °C  |  | 0.159827 ± 0.008598         | 0.002951 ± 0.000419         | 0.3504 |
| 1B16081D         | 800 °C  |  | 0.330800 ± 0.014011         | 0.002096 ± 0.000395         | 0.2102 |
| 1B16082D         | 870 °C  |  | 0.464854 ± 0.023355         | 0.002173 ± 0.000533         | 0.1988 |
| 1B16083D         | 950 °C  |  | 0.402709 ± 0.019559         | 0.002216 ± 0.000435         | 0.2334 |
| 1B16084D         | 1020 °C |  | 0.124252 ± 0.003315         | 0.003070 ± 0.000223         | 0.2273 |
| 1B16085D         | 1080 °C |  | 0.393155 ± 0.037672         | 0.002385 ± 0.000687         | 0.3263 |
| 1B16086D         | 1130 °C |  | 0.441408 ± 0.047471         | 0.002398 ± 0.000810         | 0.3125 |
| 1B16087D         | 1180 °C |  | 0.475243 ± 0.036729         | 0.001949 ± 0.000689         | 0.2122 |
| 1B16088D         | 1230 °C |  | 0.383954 ± 0.022450         | 0.002093 ± 0.000415         | 0.2883 |
| 1B16089D         | 1280 °C |  | 0.448661 ± 0.027909         | 0.001768 ± 0.000479         | 0.2227 |
| 1B16090D         | 1350 °C |  | 0.112884 ± 0.001667         | 0.002857 ± 0.000135         | 0.1727 |
| 1B16091D         | 1420 °C |  | 0.000118 ± 0.000062         | 0.003293 ± 0.000132         | 0.0036 |
| 1B16092D         | 1500 °C |  | 0.000157 ± 0.000207         | 0.003575 ± 0.000368         | 0.0139 |
| 1B16093D         | 1550 °C |  | 0.000114 ± 0.000142         | 0.003251 ± 0.000247         | 0.0079 |
| 1B15981D         | 600 °C  |  | 0.283449 ± 0.083143         | 0.002974 ± 0.002295         | 0.3786 |
| 1B15982D         | 700 °C  |  | 0.238116 ± 0.018021         | 0.002107 ± 0.000507         | 0.3031 |
| 1B15983D         | 800 °C  |  | 0.363495 ± 0.018293         | 0.001470 ± 0.000374         | 0.1889 |
| 1B15984D         | 870 °C  |  | 0.489812 ± 0.028476         | 0.002326 ± 0.000436         | 0.3003 |
| 1B15985D         | 950 °C  |  | 0.461041 ± 0.026841         | 0.002163 ± 0.000579         | 0.2097 |
| 1B15986D         | 1020 °C |  | 0.162995 ± 0.005038         | 0.002906 ± 0.000267         | 0.2520 |
| 1B15987D         | 1080 °C |  | 0.317709 ± 0.024872         | 0.002020 ± 0.000638         | 0.2440 |
| 1B15988D         | 1130 °C |  | 0.073254 ± 0.001504         | 0.003142 ± 0.000271         | 0.1858 |
| 1B15989D         | 1180 °C |  | 0.590637 ± 0.057949         | 0.001557 ± 0.000810         | 0.1855 |
| 1B15990D         | 1230 °C |  | 0.494249 ± 0.042037         | 0.001931 ± 0.000615         | 0.2625 |
| 1B15991D         | 1280 °C |  | 0.399154 ± 0.027118         | 0.001770 ± 0.000476         | 0.2408 |
| 1B15992D         | 1350 °C |  | 0.054126 ± 0.000667         | 0.003078 ± 0.000120         | 0.1222 |
| 1B15993D         | 1420 °C |  | 0.000202 ± 0.000147         | 0.003290 ± 0.000285         | 0.0145 |
| 1B15994D         | 1500 °C |  | 0.000231 ± 0.000165         | 0.003274 ± 0.000269         | 0.0134 |
| 1B15995D         | 1550 °C |  | 0.000093 ± 0.000206         | 0.003114 ± 0.000558         | 0.0047 |

| Results                 | $40(a)/36(a) \pm 2\sigma$                                           | $40(r)/39(k) \pm 2\sigma$  | Age ± 2σ (Ma)                                                                   | MSWD                                 |
|-------------------------|---------------------------------------------------------------------|----------------------------|---------------------------------------------------------------------------------|--------------------------------------|
| <b>Inverse Isochron</b> | 305.7076 ± 3.2545<br>± 1.06%                                        | 0.8566 ± 0.0533<br>± 6.22% | 1.08 ± 0.07<br>± 6.25%<br>Full External Error ± 0.07<br>Analytical Error ± 0.07 | 0.85                                 |
| <b>Statistics</b>       | Statistical F ratio<br>Error Magnification<br>Number of Data Points | 1.51<br>1.0000<br>27       | Convergence<br>Number of Iterations<br>Calculated Line                          | 0.0006183153<br>4<br>Weighted York-2 |

| Relative Abundances |         |  | 36Ar      | %1σ    | 37Ar      | %1σ     | 38Ar      | %1σ    | 39Ar      | %1σ    | 40Ar      | %1σ    | Age ± 2σ (Ma)    | 40Ar(r) (%) | 39Ar(k) (%) | K/Ca ± 2σ       |
|---------------------|---------|--|-----------|--------|-----------|---------|-----------|--------|-----------|--------|-----------|--------|------------------|-------------|-------------|-----------------|
| 1B16079D            | 600 °C  |  | 0.0000435 | 17.807 | 0.0338212 | 9.882   | 0.0000320 | 26.701 | 0.0018045 | 0.786  | 0.0091188 | 12.933 | 0.72 ± 3.70      | 11.14       | 0.44        | 0.0226 ± 0.0045 |
| 1B16080D            | 700 °C  |  | 0.0001725 | 4.993  | 0.1348004 | 5.735   | 0.0001327 | 9.751  | 0.0073815 | 0.707  | 0.0455739 | 2.587  | 0.94 ± 1.00      | 11.91       | 1.80        | 0.0232 ± 0.0027 |
| 1B16081D            | 800 °C  |  | 0.0002088 | 4.902  | 0.3102999 | 4.947   | 0.0002579 | 5.448  | 0.0193732 | 0.517  | 0.0578929 | 2.047  | 1.42 ± 0.46      | 37.41       | 4.72        | 0.0265 ± 0.0026 |
| 1B16082D            | 870 °C  |  | 0.0001992 | 5.825  | 0.3348706 | 5.083   | 0.0002805 | 4.706  | 0.0226554 | 0.400  | 0.0482258 | 2.475  | 0.95 ± 0.44      | 35.11       | 5.53        | 0.0288 ± 0.0029 |
| 1B16083D            | 950 °C  |  | 0.0001937 | 4.999  | 0.2920352 | 5.143   | 0.0002703 | 4.285  | 0.0204405 | 0.560  | 0.0502416 | 2.357  | 1.06 ± 0.42      | 33.83       | 4.99        | 0.0298 ± 0.0031 |
| 1B16084D            | 1020 °C |  | 0.0004008 | 2.915  | 0.1937563 | 5.058   | 0.0002473 | 4.217  | 0.0141540 | 0.807  | 0.1127846 | 1.049  | 0.85 ± 0.68      | 8.35        | 3.45        | 0.0311 ± 0.0032 |
| 1B16085D            | 1080 °C |  | 0.0000983 | 7.968  | 0.1373953 | 5.153   | 0.0001377 | 10.918 | 0.0099129 | 0.651  | 0.0249651 | 4.743  | 0.92 ± 0.69      | 28.77       | 2.42        | 0.0307 ± 0.0032 |
| 1B16086D            | 1130 °C |  | 0.0000876 | 9.440  | 0.1222299 | 5.848   | 0.0001439 | 7.065  | 0.0098668 | 0.702  | 0.0221575 | 5.328  | 0.81 ± 0.72      | 28.41       | 2.41        | 0.0344 ± 0.0041 |
| 1B16087D            | 1180 °C |  | 0.0001064 | 9.443  | 0.1626995 | 6.126   | 0.0002357 | 5.199  | 0.0148814 | 0.653  | 0.0310733 | 3.805  | 1.11 ± 0.57      | 41.80       | 3.64        | 0.0390 ± 0.0048 |
| 1B16088D            | 1230 °C |  | 0.0002236 | 5.709  | 0.2889910 | 5.150   | 0.0003445 | 3.501  | 0.0262782 | 0.434  | 0.0679091 | 2.888  | 1.23 ± 0.43      | 37.49       | 6.43        | 0.0388 ± 0.0040 |
| 1B16089D            | 1280 °C |  | 0.0002143 | 6.574  | 0.3573296 | 4.958   | 0.0004014 | 3.034  | 0.0290825 | 0.522  | 0.0642588 | 3.062  | 1.33 ± 0.43      | 47.21       | 7.11        | 0.0347 ± 0.0035 |
| 1B16090D            | 1350 °C |  | 0.0012381 | 1.737  | 0.7138606 | 4.903   | 0.0007638 | 2.305  | 0.0414861 | 0.465  | 0.3629229 | 0.548  | 1.64 ± 0.45      | 14.71       | 10.10       | 0.0247 ± 0.0024 |
| 1B16091D            | 1420 °C |  | 0.0015180 | 1.950  | 0.0031557 | 96.190  | 0.0002906 | 3.511  | 0.0000566 | 25.022 | 0.4606318 | 0.434  | 170.16 ± 392.34  | 1.67        | 0.01        | 0.0074 ± 0.0148 |
| 1B16092D            | 1500 °C |  | 0.0003250 | 4.649  | 0.0019469 | 102.859 | 0.0000548 | 18.699 | 0.0000157 | 59.113 | 0.0907563 | 2.173  | 641.59 ± 1602.90 | 6.74        | 0.00        | 0.0032 ± 0.0077 |
| 1B16093D            | 1550 °C |  | 0.0004796 | 3.536  | 0.0003421 | 657.186 | 0.0000642 | 16.033 | 0.0000171 | 60.331 | 0.1475047 | 1.362  | 297.71 ± 770.48  | 2.94        | 0.00        | 0.0212 ± 0.2796 |
| 1B15981D            | 600 °C  |  | 0.0000373 | 22.765 | 0.0470539 | 8.724   | 0.0000447 | 22.824 | 0.0023199 | 0.901  | 0.0080648 | 14.633 | 0.50 ± 3.10      | 11.22       | 0.56        | 0.0209 ± 0.0037 |
| 1B15982D            | 700 °C  |  | 0.0001056 | 6.976  | 0.1373724 | 5.191   | 0.0001085 | 8.574  | 0.0076550 | 0.697  | 0.0317320 | 3.713  | 1.96 ± 0.86      | 37.10       | 1.86        | 0.0236 ± 0.0025 |
| 1B15983D            | 800 °C  |  | 0.0001450 | 5.567  | 0.2617245 | 4.901   | 0.0002232 | 5.296  | 0.0177899 | 0.519  | 0.0484276 | 2.457  | 1.94 ± 0.42      | 56.09       | 4.34        | 0.0289 ± 0.0029 |
| 1B15984D            | 870 °C  |  | 0.0001747 | 4.357  | 0.2769251 | 5.088   | 0.0002836 | 6.353  | 0.0205431 | 0.499  | 0.0415419 | 2.859  | 0.79 ± 0.35      | 30.53       | 5.01        | 0.0316 ± 0.0032 |
| 1B15985D            | 950 °C  |  | 0.0001638 | 6.789  | 0.2621993 | 4.981   | 0.0002411 | 5.778  | 0.0193352 | 0.536  | 0.0415359 | 2.857  | 0.97 ± 0.49      | 35.41       | 4.72        | 0.0314 ± 0.0031 |
| 1B15986D            | 1020 °C |  | 0.0003101 | 3.566  | 0.1837296 | 5.006   | 0.0002401 | 4.411  | 0.0146198 | 0.757  | 0.0888818 | 1.339  | 1.02 ± 0.63      | 13.25       | 3.57        | 0.0339 ± 0.0034 |
| 1B15987D            | 1080 °C |  | 0.0000948 | 9.714  | 0.1184920 | 5.466   | 0.0001287 | 8.103  | 0.0097492 | 0.484  | 0.0304203 | 3.881  | 1.57 ± 0.79      | 39.69       | 2.38        | 0.0351 ± 0.0038 |
| 1B15988D            | 1130 °C |  | 0.0004409 | 3.893  | 0.1122569 | 5.240   | 0.0002156 | 5.010  | 0.0096231 | 0.466  | 0.1302537 | 0.907  | 1.07 ± 1.39      | 6.20        | 2.35        | 0.0365 ± 0.0038 |
| 1B15989D            | 1180 °C |  | 0.0000810 | 11.570 | 0.1529238 | 5.394   | 0.0002115 | 6.106  | 0.0144641 | 0.630  | 0.0243096 | 4.862  | 1.14 ± 0.55      | 53.48       | 3.54        | 0.0404 ± 0.0044 |
| 1B15990D            | 1230 °C |  | 0.0001609 | 8.269  | 0.2519427 | 4.984   | 0.0003164 | 5.691  | 0.0231770 | 0.553  | 0.0465367 | 4.213  | 1.08 ± 0.50      | 42.34       | 5.67        | 0.0392 ± 0.0039 |
| 1B15991D            | 1280 °C |  | 0.0001911 | 6.774  | 0.3057106 | 5.001   | 0.0003143 | 4.750  | 0.0238836 | 0.720  | 0.0592924 | 3.315  | 1.49 ± 0.48      | 47.15       | 5.83        | 0.0333 ± 0.0034 |
| 1B15992D            | 1350 °C |  | 0.0017718 | 1.722  | 0.4772647 | 4.911   | 0.0006935 | 2.181  | 0.0291359 | 0.454  | 0.5318755 | 0.383  | 1.88 ± 0.84      | 8.10        | 7.10        | 0.0259 ± 0.0026 |
| 1B15993D            | 1420 °C |  | 0.0004293 | 4.057  | 0.0032888 | 56.617  | 0.0000864 | 9.513  | 0.0000287 | 32.873 | 0.1302153 | 1.511  | 107.71 ± 507.73  | 1.78        | 0.01        | 0.0034 ± 0.0046 |
| 1B15994D            | 1500 °C |  | 0.0004654 | 3.848  | 0.0026803 | 65.895  | 0.0001052 | 9.803  | 0.0000348 | 33.494 | 0.1418989 | 1.401  | 118.23 ± 418.68  | 2.24        | 0.01        | 0.0053 ± 0.0079 |
| 1B15995D            | 1550 °C |  | 0.0002844 | 8.682  | 0.0018398 | 111.802 | 0.0000383 | 29.232 | 0.0000099 | 94.126 | 0.0911623 | 2.159  | 761.89 ± 2017.57 | 7.03        | 0.00        | 0.0020 ± 0.0063 |
| Σ                   |         |  | 0.0103653 | 0.779  | 5.6829384 | 1.204   | 0.0069085 | 0.990  | 0.4097753 | 0.125  | 3.0421661 | 0.280  |                  |             |             |                 |

Information on Analysis and Constants Used in Calculations

Sample = PLG-F  
Material = plg  
Location = Furnace  
Analyst = Eric Thern  
Project = ANTILLES-NICE  
Mass Discrimination Law = POW  
Irradiation = I8t2h  
J = 0.00069900 ± 0.00000203  
GA1550 = 99.769 ± 0.110 Ma  
IGSN = Undefined  
Preferred Age = Undefined  
Classification = Undefined  
Experiment Type = Undefined  
Extraction Method = Undefined  
Heating = 60 sec  
Isolation = 5.00 min  
Instrument = MAP215-50  
Lithology = Undefined  
Lat-Lon = Undefined - Undefined

Age Equations = Min et al. (2000)  
Negative Intensities = Allowed  
Decay Constant 40K = 5.549 ± 0.009 E-10 1/a  
Decay Constant 39Ar = 2.940 ± 0.029 E-07 1/h  
Decay Constant 37Ar = 8.230 ± 0.082 E-04 1/h  
Decay Constant 36Cl = 2.303 ± 0.046 E-06 1/a  
Production Ratio 36/38 in Cl = 263.0 ± 13.2  
Decay Constant 40K(εC,β<sup>-</sup>) = 0.576 ± 0.002 E-10 1/a  
Decay Constant 40K(β<sup>-</sup>) = 4.974 ± 0.009 E-10 1/a  
Abundance Ratio 40K/K = 1.1700 ± 0.0100 E-04  
Atomic Weight K = 39.0983 ± 0.0001 g

| Results          | 40(r)/39(k) ± 2σ           | Age ± 2σ (Ma)        | MSWD   | 39Ar(k) (%),n       | K/Ca ± 2σ       |
|------------------|----------------------------|----------------------|--------|---------------------|-----------------|
| Age Plateau      | 0.9134 ± 0.0940 ± 10.29%   | 1.15 ± 0.12 ± 10.30% | 0.98   | 93.24<br>27         | 0.0291 ± 0.0030 |
|                  | Full External Error ± 0.12 |                      | 2.06   | Statistical T Ratio |                 |
|                  | Analytical Error ± 0.12    |                      | 1.0000 | Error Magnification |                 |
| Total Fusion Age | 1.0496 ± 0.1294 ± 12.33%   | 1.32 ± 0.16 ± 12.34% |        | 30                  | 0.0307 ± 0.0007 |
|                  | Full External Error ± 0.16 |                      |        |                     |                 |
|                  | Analytical Error ± 0.16    |                      |        |                     |                 |
| Normal Isochron  | 0.8020 ± 0.1129 ± 14.08%   | 1.01 ± 0.14 ± 14.09% | 0.87   | 93.24<br>27         |                 |
|                  | Full External Error ± 0.14 |                      | 1.51   | Statistical F ratio |                 |
|                  | Analytical Error ± 0.14    |                      | 1.0000 | Error Magnification |                 |
| Inverse Isochron | 0.8566 ± 0.0533 ± 6.22%    | 1.08 ± 0.07 ± 6.25%  | 0.85   | 93.24<br>27         |                 |
|                  | Full External Error ± 0.07 |                      | 1.51   | Statistical F ratio |                 |
|                  | Analytical Error ± 0.07    |                      | 1.0000 | Error Magnification |                 |

Institute of Geophysics and Planetary Physics  
Scripps Institution of Oceanography, La Jolla, USA

| Procedure<br>Blanks |         | 36Ar     | 1σ       | 37Ar     | 1σ       | 38Ar     | 1σ       | 39Ar     | 1σ       | 40Ar     |
|---------------------|---------|----------|----------|----------|----------|----------|----------|----------|----------|----------|
| 1B16079D            | 600 °C  | 0.000053 | 0.000006 | 0.000418 | 0.000013 | 0.000021 | 0.000007 | 0.000016 | 0.000008 | 0.010206 |
| 1B16080D            | 700 °C  | 0.000060 | 0.000006 | 0.000404 | 0.000013 | 0.000021 | 0.000007 | 0.000016 | 0.000008 | 0.010511 |
| 1B16081D            | 800 °C  | 0.000069 | 0.000006 | 0.000389 | 0.000013 | 0.000021 | 0.000007 | 0.000016 | 0.000008 | 0.013075 |
| 1B16082D            | 870 °C  | 0.000065 | 0.000006 | 0.000382 | 0.000013 | 0.000021 | 0.000007 | 0.000016 | 0.000008 | 0.012777 |
| 1B16083D            | 950 °C  | 0.000054 | 0.000006 | 0.000381 | 0.000013 | 0.000021 | 0.000007 | 0.000016 | 0.000008 | 0.010496 |
| 1B16084D            | 1020 °C | 0.000048 | 0.000006 | 0.000386 | 0.000013 | 0.000021 | 0.000007 | 0.000016 | 0.000008 | 0.009313 |
| 1B16085D            | 1080 °C | 0.000058 | 0.000006 | 0.000392 | 0.000013 | 0.000021 | 0.000007 | 0.000016 | 0.000008 | 0.012160 |
| 1B16086D            | 1130 °C | 0.000089 | 0.000006 | 0.000398 | 0.000013 | 0.000021 | 0.000007 | 0.000016 | 0.000008 | 0.020050 |
| 1B16087D            | 1180 °C | 0.000150 | 0.000006 | 0.000401 | 0.000013 | 0.000021 | 0.000007 | 0.000016 | 0.000008 | 0.035810 |
| 1B16088D            | 1230 °C | 0.000086 | 0.000011 | 0.000378 | 0.000012 | 0.000030 | 0.000006 | 0.000015 | 0.000007 | 0.016252 |
| 1B16089D            | 1280 °C | 0.000086 | 0.000011 | 0.000378 | 0.000012 | 0.000028 | 0.000006 | 0.000015 | 0.000007 | 0.016968 |
| 1B16090D            | 1350 °C | 0.000104 | 0.000011 | 0.000384 | 0.000012 | 0.000028 | 0.000006 | 0.000015 | 0.000007 | 0.024405 |
| 1B16091D            | 1420 °C | 0.000181 | 0.000011 | 0.000394 | 0.000012 | 0.000038 | 0.000006 | 0.000015 | 0.000007 | 0.048557 |
| 1B16092D            | 1500 °C | 0.000416 | 0.000011 | 0.000405 | 0.000012 | 0.000085 | 0.000006 | 0.000015 | 0.000007 | 0.114118 |
| 1B16093D            | 1550 °C | 0.000690 | 0.000011 | 0.000407 | 0.000012 | 0.000146 | 0.000006 | 0.000015 | 0.000007 | 0.186448 |
| 1B15981D            | 600 °C  | 0.000053 | 0.000006 | 0.000418 | 0.000013 | 0.000017 | 0.000007 | 0.000016 | 0.000008 | 0.010206 |
| 1B15982D            | 700 °C  | 0.000060 | 0.000006 | 0.000404 | 0.000013 | 0.000019 | 0.000007 | 0.000016 | 0.000008 | 0.010511 |
| 1B15983D            | 800 °C  | 0.000069 | 0.000006 | 0.000389 | 0.000013 | 0.000021 | 0.000007 | 0.000016 | 0.000008 | 0.013075 |
| 1B15984D            | 870 °C  | 0.000065 | 0.000006 | 0.000382 | 0.000013 | 0.000021 | 0.000007 | 0.000016 | 0.000008 | 0.012777 |
| 1B15985D            | 950 °C  | 0.000054 | 0.000006 | 0.000381 | 0.000013 | 0.000020 | 0.000007 | 0.000016 | 0.000008 | 0.010496 |
| 1B15986D            | 1020 °C | 0.000048 | 0.000006 | 0.000386 | 0.000013 | 0.000019 | 0.000007 | 0.000016 | 0.000008 | 0.009313 |
| 1B15987D            | 1080 °C | 0.000058 | 0.000006 | 0.000392 | 0.000013 | 0.000020 | 0.000007 | 0.000016 | 0.000008 | 0.012160 |
| 1B15988D            | 1130 °C | 0.000089 | 0.000006 | 0.000398 | 0.000013 | 0.000024 | 0.000007 | 0.000016 | 0.000008 | 0.020050 |
| 1B15989D            | 1180 °C | 0.000150 | 0.000006 | 0.000401 | 0.000013 | 0.000030 | 0.000007 | 0.000016 | 0.000008 | 0.035810 |
| 1B15990D            | 1230 °C | 0.000086 | 0.000011 | 0.000378 | 0.000012 | 0.000030 | 0.000006 | 0.000015 | 0.000007 | 0.016252 |
| 1B15991D            | 1280 °C | 0.000086 | 0.000011 | 0.000378 | 0.000012 | 0.000028 | 0.000006 | 0.000015 | 0.000007 | 0.016968 |
| 1B15992D            | 1350 °C | 0.000104 | 0.000011 | 0.000384 | 0.000012 | 0.000028 | 0.000006 | 0.000015 | 0.000007 | 0.024405 |
| 1B15993D            | 1420 °C | 0.000181 | 0.000011 | 0.000394 | 0.000012 | 0.000038 | 0.000006 | 0.000015 | 0.000007 | 0.048557 |
| 1B15994D            | 1500 °C | 0.000416 | 0.000011 | 0.000405 | 0.000012 | 0.000085 | 0.000006 | 0.000015 | 0.000007 | 0.114118 |
| 1B15995D            | 1550 °C | 0.000690 | 0.000011 | 0.000407 | 0.000012 | 0.000146 | 0.000006 | 0.000015 | 0.000007 | 0.186448 |

---

$1\sigma$

---

0.001176  
0.001176  
0.001176  
0.001176  
0.001176  
0.001176  
0.001176  
0.001176  
0.001958  
0.001958  
0.001958  
0.001958  
0.001958  
0.001958  
0.001176  
0.001176  
0.001176  
0.001176  
0.001176  
0.001176  
0.001176  
0.001176  
0.001176  
0.001958  
0.001958  
0.001958  
0.001958  
0.001958  
0.001958

---

| Sample Parameters |         | Sample | Material | Location |
|-------------------|---------|--------|----------|----------|
| 1B16079D          | 600 °C  | PIg-F  | plg      | Furnace  |
| 1B16080D          | 700 °C  | PIg-F  | plg      | Furnace  |
| 1B16081D          | 800 °C  | PIg-F  | plg      | Furnace  |
| 1B16082D          | 870 °C  | PIg-F  | plg      | Furnace  |
| 1B16083D          | 950 °C  | PIg-F  | plg      | Furnace  |
| 1B16084D          | 1020 °C | PIg-F  | plg      | Furnace  |
| 1B16085D          | 1080 °C | PIg-F  | plg      | Furnace  |
| 1B16086D          | 1130 °C | PIg-F  | plg      | Furnace  |
| 1B16087D          | 1180 °C | PIg-F  | plg      | Furnace  |
| 1B16088D          | 1230 °C | PIg-F  | plg      | Furnace  |
| 1B16089D          | 1280 °C | PIg-F  | plg      | Furnace  |
| 1B16090D          | 1350 °C | PIg-F  | plg      | Furnace  |
| 1B16091D          | 1420 °C | PIg-F  | plg      | Furnace  |
| 1B16092D          | 1500 °C | PIg-F  | plg      | Furnace  |
| 1B16093D          | 1550 °C | PIg-F  | plg      | Furnace  |
| 1B15981D          | 600 °C  | PIg-G  | plg      | Furnace  |
| 1B15982D          | 700 °C  | PIg-G  | plg      | Furnace  |
| 1B15983D          | 800 °C  | PIg-G  | plg      | Furnace  |
| 1B15984D          | 870 °C  | PIg-G  | plg      | Furnace  |
| 1B15985D          | 950 °C  | PIg-G  | plg      | Furnace  |
| 1B15986D          | 1020 °C | PIg-G  | plg      | Furnace  |
| 1B15987D          | 1080 °C | PIg-G  | plg      | Furnace  |
| 1B15988D          | 1130 °C | PIg-G  | plg      | Furnace  |
| 1B15989D          | 1180 °C | PIg-G  | plg      | Furnace  |
| 1B15990D          | 1230 °C | PIg-G  | plg      | Furnace  |
| 1B15991D          | 1280 °C | PIg-G  | plg      | Furnace  |
| 1B15992D          | 1350 °C | PIg-G  | plg      | Furnace  |
| 1B15993D          | 1420 °C | PIg-G  | plg      | Furnace  |
| 1B15994D          | 1500 °C | PIg-G  | plg      | Furnace  |
| 1B15995D          | 1550 °C | PIg-G  | plg      | Furnace  |

| Analyst    | Temp |
|------------|------|
| Eric Thern | 600  |
| Eric Thern | 700  |
| Eric Thern | 800  |
| Eric Thern | 870  |
| Eric Thern | 950  |
| Eric Thern | 1020 |
| Eric Thern | 1080 |
| Eric Thern | 1130 |
| Eric Thern | 1180 |
| Eric Thern | 1230 |
| Eric Thern | 1280 |
| Eric Thern | 1350 |
| Eric Thern | 1420 |
| Eric Thern | 1500 |
| Eric Thern | 1550 |
| Eric Thern | 600  |
| Eric Thern | 700  |
| Eric Thern | 800  |
| Eric Thern | 870  |
| Eric Thern | 950  |
| Eric Thern | 1020 |
| Eric Thern | 1080 |
| Eric Thern | 1130 |
| Eric Thern | 1180 |
| Eric Thern | 1230 |
| Eric Thern | 1280 |
| Eric Thern | 1350 |
| Eric Thern | 1420 |
| Eric Thern | 1500 |
| Eric Thern | 1550 |



| Standard<br>(in Ma) | % $1\sigma$ | J        | % $1\sigma$ | MDF      | % $1\sigma$ | Volume<br>Ratio | Sensitivity<br>(mol/volt) |
|---------------------|-------------|----------|-------------|----------|-------------|-----------------|---------------------------|
| 99.769              | 0.11        | 0.000699 | 0.29        | 1.006641 | 0.31        | 1               | 4.050E-14                 |
| 99.769              | 0.11        | 0.000699 | 0.29        | 1.006641 | 0.31        | 1               | 4.050E-14                 |
| 99.769              | 0.11        | 0.000699 | 0.29        | 1.006641 | 0.31        | 1               | 4.050E-14                 |
| 99.769              | 0.11        | 0.000699 | 0.29        | 1.006641 | 0.31        | 1               | 4.050E-14                 |
| 99.769              | 0.11        | 0.000699 | 0.29        | 1.006641 | 0.31        | 1               | 4.050E-14                 |
| 99.769              | 0.11        | 0.000699 | 0.29        | 1.006641 | 0.31        | 1               | 4.050E-14                 |
| 99.769              | 0.11        | 0.000699 | 0.29        | 1.006641 | 0.31        | 1               | 4.050E-14                 |
| 99.769              | 0.11        | 0.000699 | 0.29        | 1.006641 | 0.31        | 1               | 4.050E-14                 |
| 99.769              | 0.11        | 0.000699 | 0.29        | 1.006641 | 0.31        | 1               | 4.050E-14                 |
| 99.769              | 0.11        | 0.000699 | 0.29        | 1.006641 | 0.31        | 1               | 4.050E-14                 |
| 99.769              | 0.11        | 0.000699 | 0.29        | 1.006641 | 0.31        | 1               | 4.050E-14                 |
| 99.769              | 0.11        | 0.000699 | 0.29        | 1.006641 | 0.31        | 1               | 4.050E-14                 |
| 99.769              | 0.11        | 0.000699 | 0.29        | 1.006641 | 0.31        | 1               | 4.050E-14                 |
| 99.769              | 0.11        | 0.000699 | 0.29        | 1.006641 | 0.31        | 1               | 4.050E-14                 |
| 99.769              | 0.11        | 0.000699 | 0.29        | 1.006641 | 0.31        | 1               | 4.050E-14                 |
| 99.769              | 0.11        | 0.000699 | 0.29        | 1.006626 | 0.31        | 1               | 4.050E-14                 |
| 99.769              | 0.11        | 0.000699 | 0.29        | 1.006626 | 0.31        | 1               | 4.050E-14                 |
| 99.769              | 0.11        | 0.000699 | 0.29        | 1.006626 | 0.31        | 1               | 4.050E-14                 |
| 99.769              | 0.11        | 0.000699 | 0.29        | 1.006626 | 0.31        | 1               | 4.050E-14                 |
| 99.769              | 0.11        | 0.000699 | 0.29        | 1.006626 | 0.31        | 1               | 4.050E-14                 |
| 99.769              | 0.11        | 0.000699 | 0.29        | 1.006626 | 0.31        | 1               | 4.050E-14                 |
| 99.769              | 0.11        | 0.000699 | 0.29        | 1.006626 | 0.31        | 1               | 4.050E-14                 |
| 99.769              | 0.11        | 0.000699 | 0.29        | 1.006626 | 0.31        | 1               | 4.050E-14                 |
| 99.769              | 0.11        | 0.000699 | 0.29        | 1.006626 | 0.31        | 1               | 4.050E-14                 |
| 99.769              | 0.11        | 0.000699 | 0.29        | 1.006626 | 0.31        | 1               | 4.050E-14                 |
| 99.769              | 0.11        | 0.000699 | 0.29        | 1.006626 | 0.31        | 1               | 4.050E-14                 |
| 99.769              | 0.11        | 0.000699 | 0.29        | 1.006626 | 0.31        | 1               | 4.050E-14                 |
| 99.769              | 0.11        | 0.000699 | 0.29        | 1.006626 | 0.31        | 1               | 4.050E-14                 |
| 99.769              | 0.11        | 0.000699 | 0.29        | 1.006626 | 0.31        | 1               | 4.050E-14                 |
| 99.769              | 0.11        | 0.000699 | 0.29        | 1.006626 | 0.31        | 1               | 4.050E-14                 |
| 99.769              | 0.11        | 0.000699 | 0.29        | 1.006626 | 0.31        | 1               | 4.050E-14                 |
| 99.769              | 0.11        | 0.000699 | 0.29        | 1.006626 | 0.31        | 1               | 4.050E-14                 |

Institute of Geophysics and Planetary Physics  
Scripps Institution of Oceanography, La Jolla, USA

| Day | Month | Year | Hour | Min | Resist | Irradiation | Project       | Experiment  | Nmb | Standard Name |
|-----|-------|------|------|-----|--------|-------------|---------------|-------------|-----|---------------|
| 02  | MAY   | 2011 | 21   | 19  | 001    | I8t2h       | Antilles-Nice | verati-plgF | 01  | GA1550        |
| 02  | MAY   | 2011 | 22   | 02  | 001    | I8t2h       | Antilles-Nice | verati-plgF | 01  | GA1550        |
| 02  | MAY   | 2011 | 22   | 44  | 001    | I8t2h       | Antilles-Nice | verati-plgF | 01  | GA1550        |
| 02  | MAY   | 2011 | 23   | 27  | 001    | I8t2h       | Antilles-Nice | verati-plgF | 01  | GA1550        |
| 03  | MAY   | 2011 | 00   | 10  | 001    | I8t2h       | Antilles-Nice | verati-plgF | 01  | GA1550        |
| 03  | MAY   | 2011 | 00   | 53  | 001    | I8t2h       | Antilles-Nice | verati-plgF | 01  | GA1550        |
| 03  | MAY   | 2011 | 01   | 35  | 001    | I8t2h       | Antilles-Nice | verati-plgF | 01  | GA1550        |
| 03  | MAY   | 2011 | 02   | 18  | 001    | I8t2h       | Antilles-Nice | verati-plgF | 01  | GA1550        |
| 03  | MAY   | 2011 | 03   | 01  | 001    | I8t2h       | Antilles-Nice | verati-plgF | 01  | GA1550        |
| 03  | MAY   | 2011 | 03   | 44  | 001    | I8t2h       | Antilles-Nice | verati-plgF | 01  | GA1550        |
| 03  | MAY   | 2011 | 04   | 26  | 001    | I8t2h       | Antilles-Nice | verati-plgF | 01  | GA1550        |
| 03  | MAY   | 2011 | 05   | 09  | 001    | I8t2h       | Antilles-Nice | verati-plgF | 01  | GA1550        |
| 03  | MAY   | 2011 | 05   | 51  | 001    | I8t2h       | Antilles-Nice | verati-plgF | 01  | GA1550        |
| 03  | MAY   | 2011 | 06   | 34  | 001    | I8t2h       | Antilles-Nice | verati-plgF | 01  | GA1550        |
| 03  | MAY   | 2011 | 07   | 18  | 001    | I8t2h       | Antilles-Nice | verati-plgF | 01  | GA1550        |
| 29  | APR   | 2011 | 18   | 50  | 001    | I8t2h       | Antilles-Nice | 1B15981D    | 02  | GA1550        |
| 29  | APR   | 2011 | 19   | 33  | 001    | I8t2h       | Antilles-Nice | 1B15981D    | 02  | GA1550        |
| 29  | APR   | 2011 | 20   | 16  | 001    | I8t2h       | Antilles-Nice | 1B15981D    | 02  | GA1550        |
| 29  | APR   | 2011 | 20   | 58  | 001    | I8t2h       | Antilles-Nice | 1B15981D    | 02  | GA1550        |
| 29  | APR   | 2011 | 21   | 41  | 001    | I8t2h       | Antilles-Nice | 1B15981D    | 02  | GA1550        |
| 29  | APR   | 2011 | 22   | 24  | 001    | I8t2h       | Antilles-Nice | 1B15981D    | 02  | GA1550        |
| 29  | APR   | 2011 | 23   | 07  | 001    | I8t2h       | Antilles-Nice | 1B15981D    | 02  | GA1550        |
| 29  | APR   | 2011 | 23   | 49  | 001    | I8t2h       | Antilles-Nice | 1B15981D    | 02  | GA1550        |
| 30  | APR   | 2011 | 00   | 32  | 001    | I8t2h       | Antilles-Nice | 1B15981D    | 02  | GA1550        |
| 30  | APR   | 2011 | 01   | 15  | 001    | I8t2h       | Antilles-Nice | 1B15981D    | 02  | GA1550        |
| 30  | APR   | 2011 | 01   | 58  | 001    | I8t2h       | Antilles-Nice | 1B15981D    | 02  | GA1550        |
| 30  | APR   | 2011 | 02   | 40  | 001    | I8t2h       | Antilles-Nice | 1B15981D    | 02  | GA1550        |
| 30  | APR   | 2011 | 03   | 23  | 001    | I8t2h       | Antilles-Nice | 1B15981D    | 02  | GA1550        |
| 30  | APR   | 2011 | 04   | 06  | 001    | I8t2h       | Antilles-Nice | 1B15981D    | 02  | GA1550        |
| 30  | APR   | 2011 | 04   | 50  | 001    | I8t2h       | Antilles-Nice | 1B15981D    | 02  | GA1550        |

| Irradiation<br>Constants | 40/36(a)  |        | 40/36(c)  |       | 38/36(a)  |        | 38/36(c)  |       |   |
|--------------------------|-----------|--------|-----------|-------|-----------|--------|-----------|-------|---|
|                          | Temp (°C) | %1σ    | Temp (°C) | %1σ   | Temp (°C) | %1σ    | Temp (°C) | %1σ   |   |
| 1B16079D                 | 600 °C    | 298.56 | 0.1       | 0.018 | 35        | 0.1869 | 0.1       | 1.493 | 3 |
| 1B16080D                 | 700 °C    | 298.56 | 0.1       | 0.018 | 35        | 0.1869 | 0.1       | 1.493 | 3 |
| 1B16081D                 | 800 °C    | 298.56 | 0.1       | 0.018 | 35        | 0.1869 | 0.1       | 1.493 | 3 |
| 1B16082D                 | 870 °C    | 298.56 | 0.1       | 0.018 | 35        | 0.1869 | 0.1       | 1.493 | 3 |
| 1B16083D                 | 950 °C    | 298.56 | 0.1       | 0.018 | 35        | 0.1869 | 0.1       | 1.493 | 3 |
| 1B16084D                 | 1020 °C   | 298.56 | 0.1       | 0.018 | 35        | 0.1869 | 0.1       | 1.493 | 3 |
| 1B16085D                 | 1080 °C   | 298.56 | 0.1       | 0.018 | 35        | 0.1869 | 0.1       | 1.493 | 3 |
| 1B16086D                 | 1130 °C   | 298.56 | 0.1       | 0.018 | 35        | 0.1869 | 0.1       | 1.493 | 3 |
| 1B16087D                 | 1180 °C   | 298.56 | 0.1       | 0.018 | 35        | 0.1869 | 0.1       | 1.493 | 3 |
| 1B16088D                 | 1230 °C   | 298.56 | 0.1       | 0.018 | 35        | 0.1869 | 0.1       | 1.493 | 3 |
| 1B16089D                 | 1280 °C   | 298.56 | 0.1       | 0.018 | 35        | 0.1869 | 0.1       | 1.493 | 3 |
| 1B16090D                 | 1350 °C   | 298.56 | 0.1       | 0.018 | 35        | 0.1869 | 0.1       | 1.493 | 3 |
| 1B16091D                 | 1420 °C   | 298.56 | 0.1       | 0.018 | 35        | 0.1869 | 0.1       | 1.493 | 3 |
| 1B16092D                 | 1500 °C   | 298.56 | 0.1       | 0.018 | 35        | 0.1869 | 0.1       | 1.493 | 3 |
| 1B16093D                 | 1550 °C   | 298.56 | 0.1       | 0.018 | 35        | 0.1869 | 0.1       | 1.493 | 3 |
| 1B15981D                 | 600 °C    | 298.56 | 0.1       | 0.018 | 35        | 0.1869 | 0.1       | 1.493 | 3 |
| 1B15982D                 | 700 °C    | 298.56 | 0.1       | 0.018 | 35        | 0.1869 | 0.1       | 1.493 | 3 |
| 1B15983D                 | 800 °C    | 298.56 | 0.1       | 0.018 | 35        | 0.1869 | 0.1       | 1.493 | 3 |
| 1B15984D                 | 870 °C    | 298.56 | 0.1       | 0.018 | 35        | 0.1869 | 0.1       | 1.493 | 3 |
| 1B15985D                 | 950 °C    | 298.56 | 0.1       | 0.018 | 35        | 0.1869 | 0.1       | 1.493 | 3 |
| 1B15986D                 | 1020 °C   | 298.56 | 0.1       | 0.018 | 35        | 0.1869 | 0.1       | 1.493 | 3 |
| 1B15987D                 | 1080 °C   | 298.56 | 0.1       | 0.018 | 35        | 0.1869 | 0.1       | 1.493 | 3 |
| 1B15988D                 | 1130 °C   | 298.56 | 0.1       | 0.018 | 35        | 0.1869 | 0.1       | 1.493 | 3 |
| 1B15989D                 | 1180 °C   | 298.56 | 0.1       | 0.018 | 35        | 0.1869 | 0.1       | 1.493 | 3 |
| 1B15990D                 | 1230 °C   | 298.56 | 0.1       | 0.018 | 35        | 0.1869 | 0.1       | 1.493 | 3 |
| 1B15991D                 | 1280 °C   | 298.56 | 0.1       | 0.018 | 35        | 0.1869 | 0.1       | 1.493 | 3 |
| 1B15992D                 | 1350 °C   | 298.56 | 0.1       | 0.018 | 35        | 0.1869 | 0.1       | 1.493 | 3 |
| 1B15993D                 | 1420 °C   | 298.56 | 0.1       | 0.018 | 35        | 0.1869 | 0.1       | 1.493 | 3 |
| 1B15994D                 | 1500 °C   | 298.56 | 0.1       | 0.018 | 35        | 0.1869 | 0.1       | 1.493 | 3 |
| 1B15995D                 | 1550 °C   | 298.56 | 0.1       | 0.018 | 35        | 0.1869 | 0.1       | 1.493 | 3 |

| 39/37(ca) | %1 $\sigma$ | 38/37(ca) | %1 $\sigma$ | 36/37(ca) | %1 $\sigma$ | 40/39(k) | %1 $\sigma$ | 38/39(k) | %1 $\sigma$ | 36/38(cl) | %1 $\sigma$ |
|-----------|-------------|-----------|-------------|-----------|-------------|----------|-------------|----------|-------------|-----------|-------------|
| 0.00073   | 11          | 0.0000229 | 10          | 0.000282  | 1           | 0.000676 | 10          | 0.0124   | 32          | 270       | 0           |
| 0.00073   | 11          | 0.0000229 | 10          | 0.000282  | 1           | 0.000676 | 10          | 0.0124   | 32          | 270       | 0           |
| 0.00073   | 11          | 0.0000229 | 10          | 0.000282  | 1           | 0.000676 | 10          | 0.0124   | 32          | 270       | 0           |
| 0.00073   | 11          | 0.0000229 | 10          | 0.000282  | 1           | 0.000676 | 10          | 0.0124   | 32          | 270       | 0           |
| 0.00073   | 11          | 0.0000229 | 10          | 0.000282  | 1           | 0.000676 | 10          | 0.0124   | 32          | 270       | 0           |
| 0.00073   | 11          | 0.0000229 | 10          | 0.000282  | 1           | 0.000676 | 10          | 0.0124   | 32          | 270       | 0           |
| 0.00073   | 11          | 0.0000229 | 10          | 0.000282  | 1           | 0.000676 | 10          | 0.0124   | 32          | 270       | 0           |
| 0.00073   | 11          | 0.0000229 | 10          | 0.000282  | 1           | 0.000676 | 10          | 0.0124   | 32          | 270       | 0           |
| 0.00073   | 11          | 0.0000229 | 10          | 0.000282  | 1           | 0.000676 | 10          | 0.0124   | 32          | 270       | 0           |
| 0.00073   | 11          | 0.0000229 | 10          | 0.000282  | 1           | 0.000676 | 10          | 0.0124   | 32          | 270       | 0           |
| 0.00073   | 11          | 0.0000229 | 10          | 0.000282  | 1           | 0.000676 | 10          | 0.0124   | 32          | 270       | 0           |
| 0.00073   | 11          | 0.0000229 | 10          | 0.000282  | 1           | 0.000676 | 10          | 0.0124   | 32          | 270       | 0           |
| 0.00073   | 11          | 0.0000229 | 10          | 0.000282  | 1           | 0.000676 | 10          | 0.0124   | 32          | 270       | 0           |
| 0.00073   | 11          | 0.0000229 | 10          | 0.000282  | 1           | 0.000676 | 10          | 0.0124   | 32          | 270       | 0           |
| 0.00073   | 11          | 0.0000229 | 10          | 0.000282  | 1           | 0.000676 | 10          | 0.0124   | 32          | 270       | 0           |
| 0.00073   | 11          | 0.0000229 | 10          | 0.000282  | 1           | 0.000676 | 10          | 0.0124   | 32          | 270       | 0           |
| 0.00073   | 11          | 0.0000229 | 10          | 0.000282  | 1           | 0.000676 | 10          | 0.0124   | 32          | 270       | 0           |
| 0.00073   | 11          | 0.0000229 | 10          | 0.000282  | 1           | 0.000676 | 10          | 0.0124   | 32          | 270       | 0           |
| 0.00073   | 11          | 0.0000229 | 10          | 0.000282  | 1           | 0.000676 | 10          | 0.0124   | 32          | 270       | 0           |
| 0.00073   | 11          | 0.0000229 | 10          | 0.000282  | 1           | 0.000676 | 10          | 0.0124   | 32          | 270       | 0           |
| 0.00073   | 11          | 0.0000229 | 10          | 0.000282  | 1           | 0.000676 | 10          | 0.0124   | 32          | 270       | 0           |
| 0.00073   | 11          | 0.0000229 | 10          | 0.000282  | 1           | 0.000676 | 10          | 0.0124   | 32          | 270       | 0           |
| 0.00073   | 11          | 0.0000229 | 10          | 0.000282  | 1           | 0.000676 | 10          | 0.0124   | 32          | 270       | 0           |
| 0.00073   | 11          | 0.0000229 | 10          | 0.000282  | 1           | 0.000676 | 10          | 0.0124   | 32          | 270       | 0           |
| 0.00073   | 11          | 0.0000229 | 10          | 0.000282  | 1           | 0.000676 | 10          | 0.0124   | 32          | 270       | 0           |
| 0.00073   | 11          | 0.0000229 | 10          | 0.000282  | 1           | 0.000676 | 10          | 0.0124   | 32          | 270       | 0           |
| 0.00073   | 11          | 0.0000229 | 10          | 0.000282  | 1           | 0.000676 | 10          | 0.0124   | 32          | 270       | 0           |
| 0.00073   | 11          | 0.0000229 | 10          | 0.000282  | 1           | 0.000676 | 10          | 0.0124   | 32          | 270       | 0           |
| 0.00073   | 11          | 0.0000229 | 10          | 0.000282  | 1           | 0.000676 | 10          | 0.0124   | 32          | 270       | 0           |
| 0.00073   | 11          | 0.0000229 | 10          | 0.000282  | 1           | 0.000676 | 10          | 0.0124   | 32          | 270       | 0           |
| 0.00073   | 11          | 0.0000229 | 10          | 0.000282  | 1           | 0.000676 | 10          | 0.0124   | 32          | 270       | 0           |
| 0.00073   | 11          | 0.0000229 | 10          | 0.000282  | 1           | 0.000676 | 10          | 0.0124   | 32          | 270       | 0           |
| 0.00073   | 11          | 0.0000229 | 10          | 0.000282  | 1           | 0.000676 | 10          | 0.0124   | 32          | 270       | 0           |
| 0.00073   | 11          | 0.0000229 | 10          | 0.000282  | 1           | 0.000676 | 10          | 0.0124   | 32          | 270       | 0           |
| 0.00073   | 11          | 0.0000229 | 10          | 0.000282  | 1           | 0.000676 | 10          | 0.0124   | 32          | 270       | 0           |
| 0.00073   | 11          | 0.0000229 | 10          | 0.000282  | 1           | 0.000676 | 10          | 0.0124   | 32          | 270       | 0           |
| 0.00073   | 11          | 0.0000229 | 10          | 0.000282  | 1           | 0.000676 | 10          | 0.0124   | 32          | 270       | 0           |
| 0.00073   | 11          | 0.0000229 | 10          | 0.000282  | 1           | 0.000676 | 10          | 0.0124   | 32          | 270       | 0           |
| 0.00073   | 11          | 0.0000229 | 10          | 0.000282  | 1           | 0.000676 | 10          | 0.0124   | 32          | 270       | 0           |

| K/Ca | %1σ | K/Cl | %1σ | Ca/Cl | %1σ |
|------|-----|------|-----|-------|-----|
| 0.43 | 0   | 0    | 0   | 0     | 0   |
| 0.43 | 0   | 0    | 0   | 0     | 0   |
| 0.43 | 0   | 0    | 0   | 0     | 0   |
| 0.43 | 0   | 0    | 0   | 0     | 0   |
| 0.43 | 0   | 0    | 0   | 0     | 0   |
| 0.43 | 0   | 0    | 0   | 0     | 0   |
| 0.43 | 0   | 0    | 0   | 0     | 0   |
| 0.43 | 0   | 0    | 0   | 0     | 0   |
| 0.43 | 0   | 0    | 0   | 0     | 0   |
| 0.43 | 0   | 0    | 0   | 0     | 0   |
| 0.43 | 0   | 0    | 0   | 0     | 0   |
| 0.43 | 0   | 0    | 0   | 0     | 0   |
| 0.43 | 0   | 0    | 0   | 0     | 0   |
| 0.43 | 0   | 0    | 0   | 0     | 0   |
| 0.43 | 0   | 0    | 0   | 0     | 0   |
| 0.43 | 0   | 0    | 0   | 0     | 0   |
| 0.43 | 0   | 0    | 0   | 0     | 0   |
| 0.43 | 0   | 0    | 0   | 0     | 0   |
| 0.43 | 0   | 0    | 0   | 0     | 0   |
| 0.43 | 0   | 0    | 0   | 0     | 0   |
| 0.43 | 0   | 0    | 0   | 0     | 0   |
| 0.43 | 0   | 0    | 0   | 0     | 0   |
| 0.43 | 0   | 0    | 0   | 0     | 0   |
| 0.43 | 0   | 0    | 0   | 0     | 0   |
| 0.43 | 0   | 0    | 0   | 0     | 0   |
| 0.43 | 0   | 0    | 0   | 0     | 0   |
| 0.43 | 0   | 0    | 0   | 0     | 0   |
| 0.43 | 0   | 0    | 0   | 0     | 0   |
| 0.43 | 0   | 0    | 0   | 0     | 0   |
| 0.43 | 0   | 0    | 0   | 0     | 0   |
| 0.43 | 0   | 0    | 0   | 0     | 0   |

VERATI-COMBOPLAGF+G.AGE >>> PLG-F >>> ANTILLES-NICE PROJECT

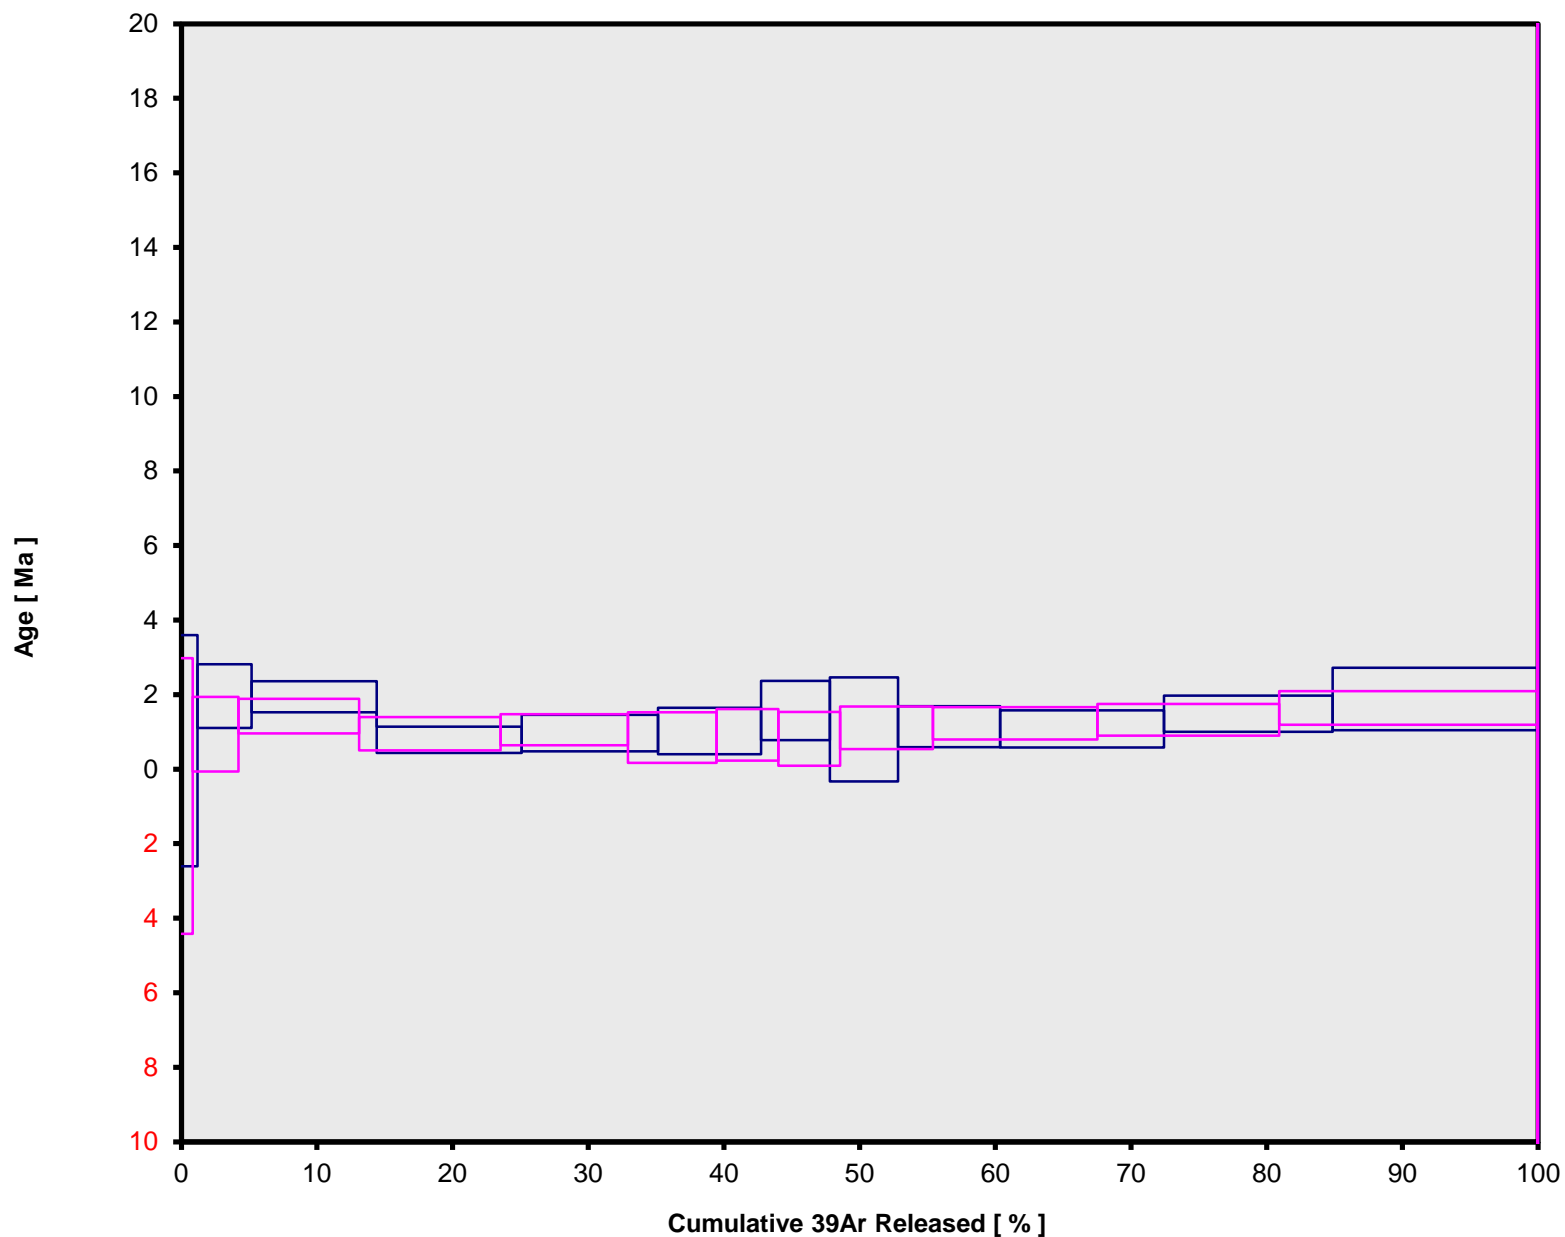

**Ar-Ages in Ma**

**WEIGHTED PLATEAU**

**1.15 ± 0.12**

**TOTAL FUSION**

**1.32 ± 0.16**

**NORMAL ISOCHRON**

**1.01 ± 0.14**

**INVERSE ISOCHRON**

**1.08 ± 0.07**

**MSWD**

**0.98**

**Sample Info**

**plg**

**Furnace**

**Eric Thern**

**IRR = 18t2h**

**J = 0.00069900 ±**

**0.00000203**

VERATI-COMBOPLAGF+G.AGE >>> PLG-F >>> ANTILLES-NICE PROJECT

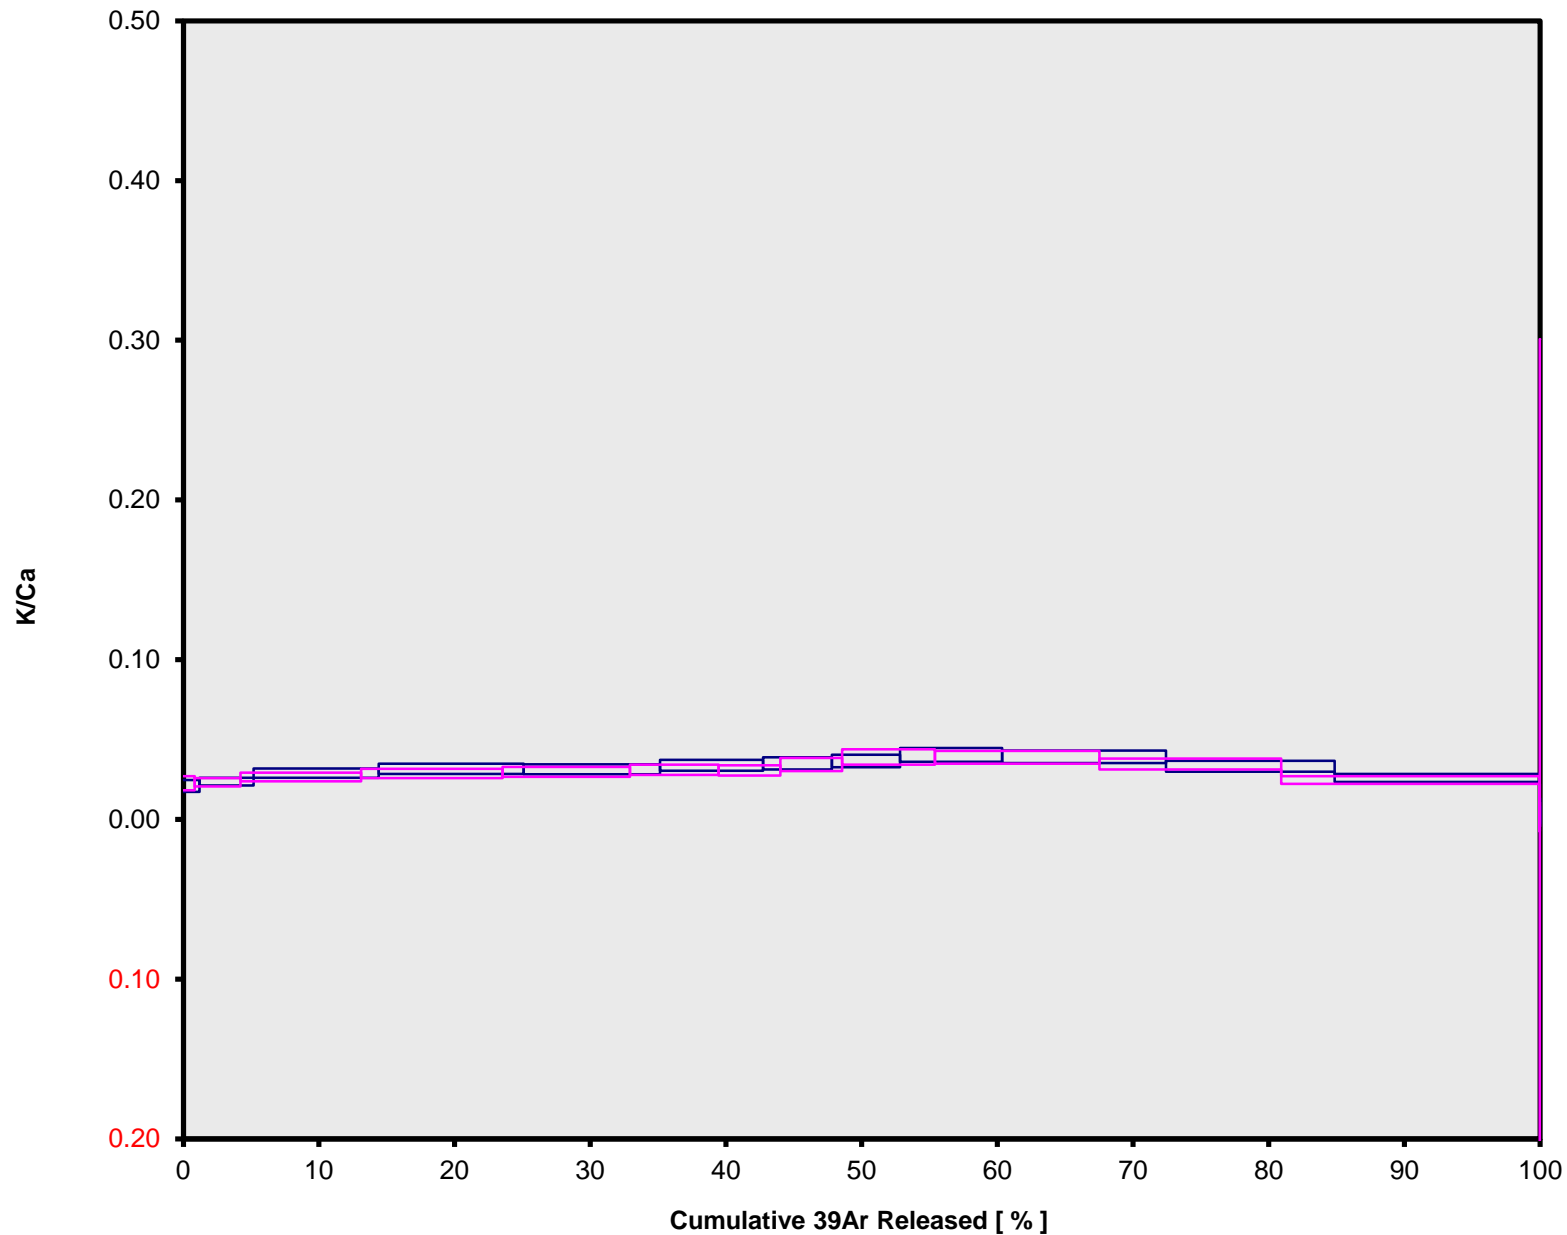

Ar-Ages in Ma

WEIGHTED PLATEAU  
 $1.15 \pm 0.12$   
TOTAL FUSION  
 $1.32 \pm 0.16$   
NORMAL ISOCHRON  
 $1.01 \pm 0.14$   
INVERSE ISOCHRON  
 $1.08 \pm 0.07$

Sample Info

plg  
Furnace  
Eric Thern  
  
IRR = 18t2h  
J =  $0.00069900 \pm 0.00000203$

VERATI-COMBOPLAGF+G.AGE >>> PLG-F >>> ANTILLES-NICE PROJECT

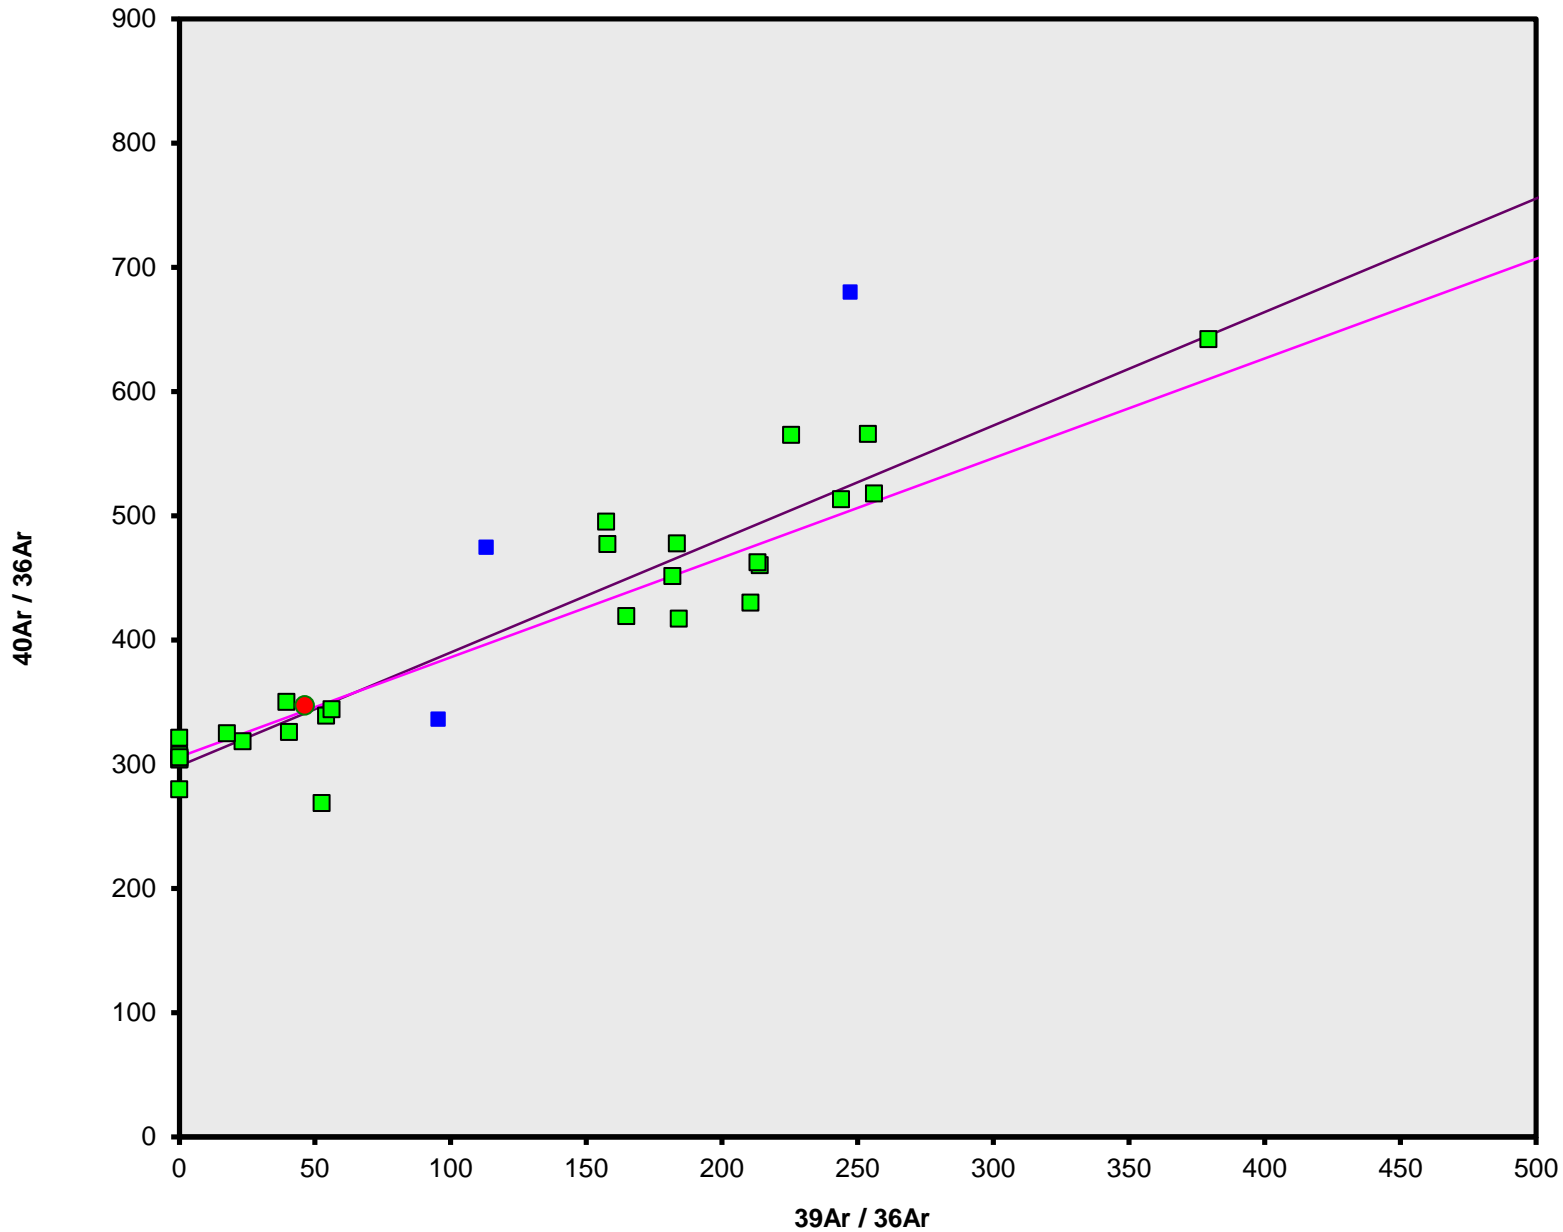

Ar-Ages in Ma

WEIGHTED PLATEAU

$1.15 \pm 0.12$

TOTAL FUSION

$1.32 \pm 0.16$

NORMAL ISOCHRON

$1.01 \pm 0.14$

INVERSE ISOCHRON

$1.08 \pm 0.07$

MSWD

0.87

40AR/36AR

INTERCEPT

$305.7 \pm 6.5$

Sample Info

plg

Furnace

Eric Thern

IRR = 18t2h

$J = 0.00069900 \pm$

$0.00000203$



VERATI-COMBOPLAGF+G.AGE >>> PLG-F >>> ANTILLES-NICE PROJECT

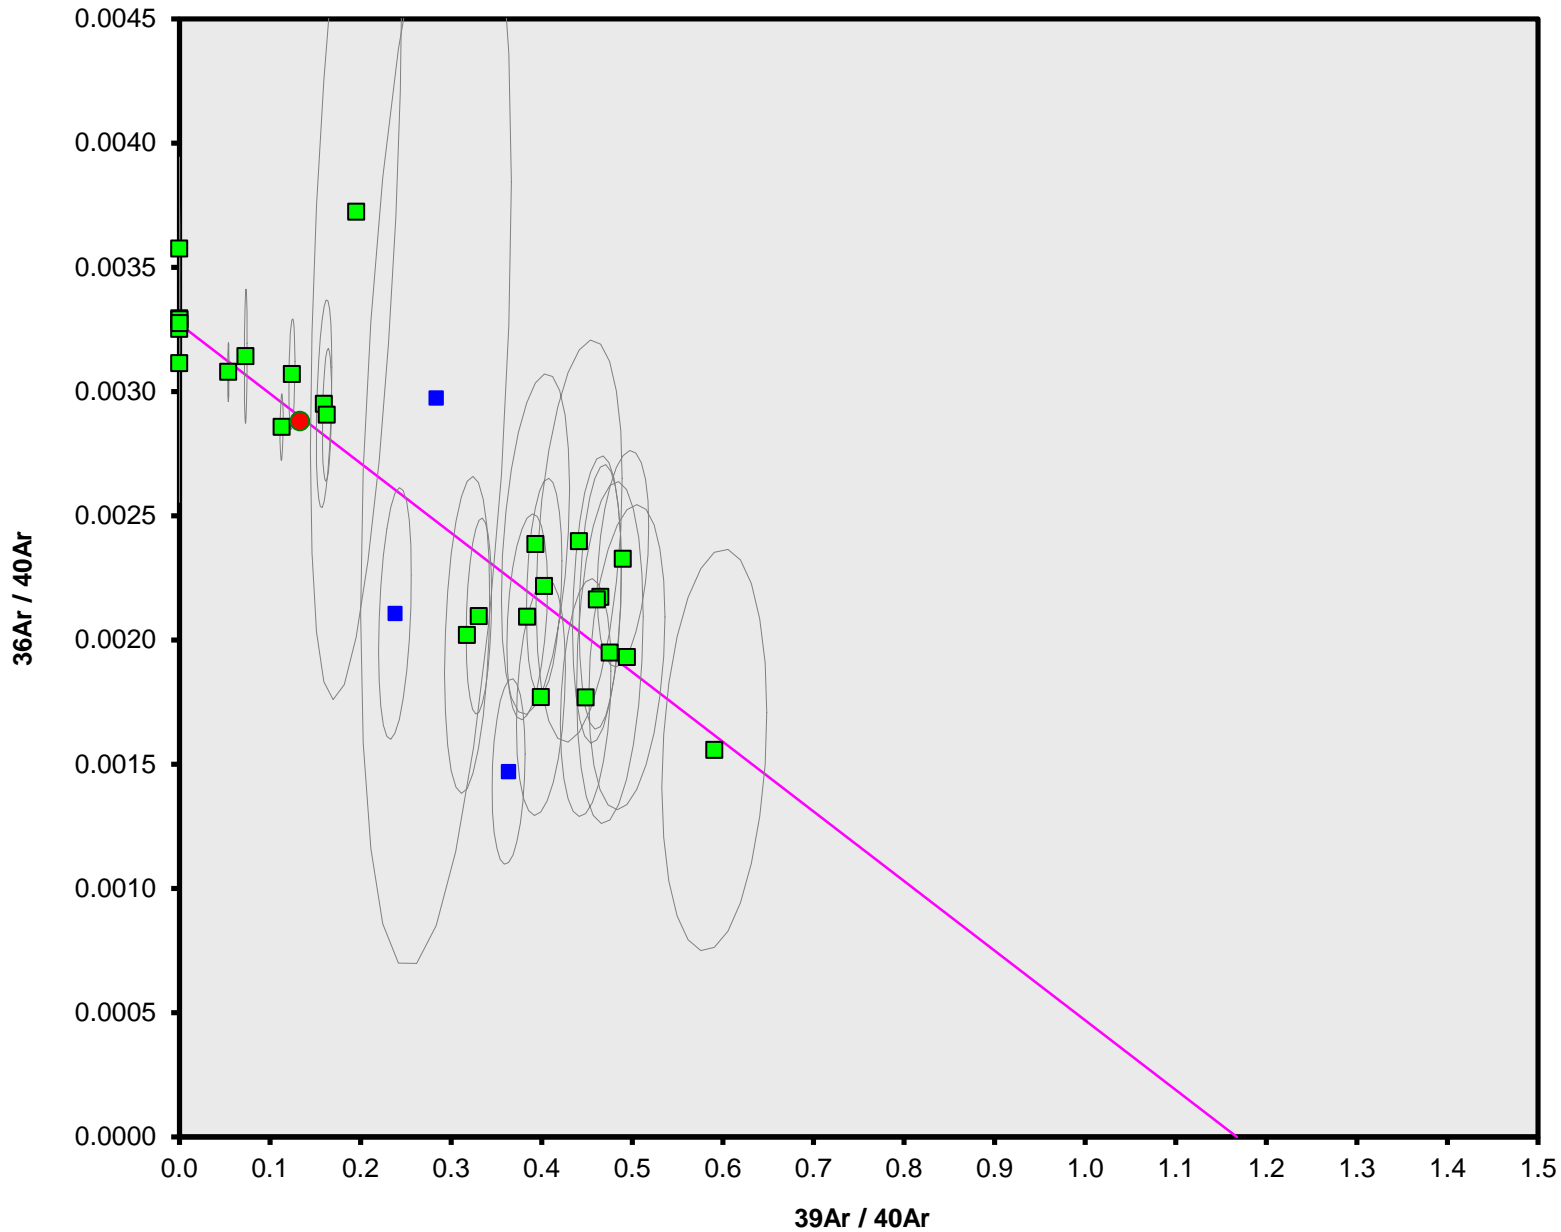

**Ar-Ages in Ma**

**WEIGHTED PLATEAU**

$1.15 \pm 0.12$

**TOTAL FUSION**

$1.32 \pm 0.16$

**NORMAL ISOCHRON**

$1.01 \pm 0.14$

**INVERSE ISOCHRON**

$1.08 \pm 0.07$

**MSWD**

0.85

**40AR/36AR**

**INTERCEPT**

$305.7 \pm 3.3$

**Sample Info**

plg

Furnace

Eric Thern

IRR = 18t2h

$J = 0.00069900 \pm$

$0.00000203$
